1                    Detecting archaic introgression without archaic reference genomes

2

3    Laurits Skov<sup>1\*</sup>, Ruoyun Hui<sup>2</sup>, Asger Hobolth<sup>1</sup>, Aylwyn Scally<sup>2</sup>, Mikkel Heide Schierup<sup>1</sup>, Richard  
4    Durbin<sup>2,3\*</sup>

5

6    1. Bioinformatics Research Centre, Aarhus University, 8000 Aarhus C., Denmark

7    2. Department of Genetics, University of Cambridge, Cambridge CB2 3EH, United Kingdom

8    3. Wellcome Sanger Institute, Hinxton, Cambridge CB10 1SA, United Kingdom

9

10    \*Correspondence: [lskov@cs.au.dk](mailto:lskov@cs.au.dk), [rd@sanger.ac.uk](mailto:rd@sanger.ac.uk)

11

12

13

14 **Abstract**

15 Human populations out of Africa have experienced at least two bouts of introgression from  
16 archaic humans, from Neanderthals and Denisovans. In Papuans there is prior evidence of both  
17 these introgressions. Here we present a new approach to detect segments of individual genomes  
18 of archaic origin without using an archaic reference genome. The approach is based on a hidden  
19 Markov model that identifies genomic regions with a high density of single nucleotide variants  
20 (SNVs) not seen in unadmixed populations. We show using simulations that this provides a  
21 powerful approach to identifying segments of archaic introgression with a small rate of false  
22 detection. Furthermore our approach is able to accurately infer admixture proportions and  
23 divergence time of human and archaic populations.

24 We apply the model to detect archaic introgression in 89 Papuans and show how the identified  
25 segments can be assigned to likely Neanderthal or Denisovan origin. We report more Denisovan  
26 admixture than previous studies and directly find a shift in size distribution of fragments of  
27 Neanderthal and Denisovan origin that is compatible with a difference in admixture time.  
28 Furthermore, we identify small amounts of Denisova ancestry in West Eurasians, South East Asians  
29 and South Asians.

## 30 **Introduction**

31 Archaic introgression into modern humans occurred at least twice (Neanderthals and Denisovans)  
32 (MEYER *et al.* 2012; PRUFER *et al.* 2014) and had a phenotypic effect on humans (HUERTA-SANCHEZ *et*  
33 *al.* 2014; DANNEMANN *et al.* 2017; RACIMO *et al.* 2017). A substantial amount of Neanderthal and  
34 Denisovan genetic material is still present in modern humans and we can learn about archaic  
35 populations from studying their genetic variants in humans.

36

37 To harness this information a number of methods have been developed to infer segments of  
38 archaic ancestry in an individual's genome. Scanning along the genome, Hidden Markov Models  
39 (HMMs)(PRUFER *et al.* 2014; SEGUIN-ORLANDO *et al.* 2014) and Conditional Random Fields  
40 (CRF)(SANKARARAMAN *et al.* 2016) can identify haplotype segments in non-Africans that are both  
41 closer to the archaic reference genomes than to Africans, and also longer than expected by  
42 incomplete lineage sorting; these are then identified as likely archaic introgressed segments.  
43 Another approach is to identify segments with more variants in high linkage disequilibrium (LD)  
44 that are unique to non-Africans than expected given a certain demographic scenario (PLAGNOL and  
45 WALL 2006). The latest implementations of this method also use an archaic reference genome for  
46 refining the set of putative archaic haplotypes (VERNOT *et al.* 2016).

47

48 The use of archaic reference genomes for identification of introgressed fragments has drawbacks.  
49 First, since the Neanderthal reference genomes are closer to the introgressing Neanderthal  
50 (80,000-145,000 years divergence)(PRUFER *et al.* 2017) , than the introgressing Denisova is to the  
51 Denisova genome (276,000-403,000 years divergence)(PRUFER *et al.* 2014) detecting Denisovan  
52 ancestry will be harder. Second, the reliance on having reference genomes implies that the  
53 introgression maps generated by these methods need updates whenever more archaic reference  
54 genomes are sequenced (PRUFER *et al.* 2017). Finally, it may be hard to identify introgressing  
55 segments of unknown archaic origin if such exists, as in the case of the putative archaic  
56 introgression into Pygmies (HSIEH *et al.* 2016) and Andamanese islanders (MONDAL *et al.* 2016).

57

58 Here we present a new method for the identification of archaic introgression that does not require  
59 a reference genome or prior knowledge of demographic parameters, but uses density of variants

60 in individuals private to their population of origin. We demonstrate with Papuans how we can  
61 estimate demographic parameters relevant to introgression and infer more archaic material than  
62 previously. Furthermore we can separate introgression events into Denisovan and Neanderthal  
63 components that display different length distributions in accordance with different admixture  
64 times.

65

## 66 **Method**

### 67 *Model*

68 An archaic genomic segment introgressed into a population is expected to have a high density of  
69 variants not found in populations without the introgression. We use a Hidden Markov Model  
70 (HMM) to classify genomic segments into states with varying density of such variants. We focus on  
71 a scenario where introgression with a deeply divergent archaic population only happened into an  
72 ingroup and not the outgroup, see Figure 1a. By removing variants found in the outgroup we can  
73 better distinguish introgressed segments from non-introgressed segments based on the density of  
74 remaining variants, see Figure 1a. These remaining variants, which we denote private variants  
75 (because they are private to the ingroup with respect to the outgroup) can either have occurred  
76 on the branch starting from the split of the ingroup and outgroup, or on the introgressing  
77 population's branch. Because the introgressing segments have had a longer time to accumulate  
78 variants, they should have a higher density of private variants.

79 Thus, we define a HMM with two states. The hidden states are Ingroup and Archaic, and the  
80 probability for changing state in the Ingroup is  $p$  and the probability for changing state in the  
81 Archaic is  $q$ , see Figure 1b. The probability of changing state can also be expressed in terms of a  
82 constant recombination rate between windows  $r \cdot L$ , the admixture time  $T_{admix}$  and admixture  
83 proportion  $a$ , see Figure 1b.

84 For practical purposes we bin the genome into windows of length  $L$  (typically  $L = 1000$  bp). The  
85 number of private variants observed in a window is Poisson distributed with a rate  $\lambda_{Ingroup}$  and  
86  $\lambda_{Archaic}$ , respectively where  $\lambda_{Ingroup} = \mu \cdot L \cdot T_{Ingroup}$  and  $\lambda_{Archaic} = \mu \cdot L \cdot T_{Archaic}$ ,  $\mu$  is the  
87 mutation rate,  $T_{Ingroup}$  is the mean coalescence time for the ingroup and the outgroup and  
88  $T_{Archaic}$  is the mean coalescence time for the archaic population and the outgroup, see Figure 1c.

89 We make a correction to the rates to take into account the number of missing bases in a window  
90 and the local mutation rate. For window  $i$  we have  $\lambda_{Ingroup}^i = \mu_i \cdot L_i \cdot T_{Ingroup}$  and  $\lambda_{Archaic}^i = \mu_i \cdot$   
91  $L_i \cdot T_{Archaic}$ , where  $\mu_i$  is the local mutation rate and  $L_i$  is the number of called bases in a window.

92 The set of transition parameters  $p, q$  and the Poisson parameters  $\lambda_{Ingroup}, \lambda_{Archaic}$  that maximize  
93 the likelihood given the observations are found using the Baum-Welch algorithm for an individual  
94 genome. These parameters are informative of the mean coalescence times between the ingroup  
95 and outgroup and between the archaic and the outgroup, the admixture time and the admixture  
96 proportion if we assume a known mutation rate  $\mu$  and a known recombination rate between  
97 windows  $rL$ . Once the set of optimal parameters are found they can be used to decode the  
98 genome, using posterior decoding to identify candidate introgressed segments as consecutive  
99 regions with posterior probability of coming from the archaic state above some threshold.

100 To avoid problems with phasing we run this model on unphased diploid genomes. Heterozygous  
101 archaic segments will still stand out from homozygous non-introgressed segments. Formally this is  
102 equivalent to assuming that homozygous introgressed segments are sufficiently rare that they can  
103 be ignored for model fitting. In practice any homozygous archaic segments will have higher  
104 private variant density than heterozygous segments, so in the absence of a homozygous HMM  
105 state they will be classified with the heterozygous state.

## 106 **Results**

### 107 *Testing the model with simulations*

108 To investigate the ability of our model to identify archaic (Neanderthal and Denisovan) admixture  
109 into Papuans we simulated whole autosome diploid data using a coalescent simulator, with  
110 admixture with an archaic hominin 1,500 generations ago replacing 5% of the population – (a  
111 script with all demographic parameters are shown in Supporting information – Simulation script.py  
112 and a graphic representation of the demography is shown in Supporting figure 1). We simulated  
113 three scenarios to test the effects of missing data and varying recombination rate. The mutation  
114 rate was kept constant across the genome for all simulations.

115 First, we simulated five individuals where every base in the genome is called equally well and  
116 there is a constant recombination rate of  $1.2 \cdot 10^{-8}$  events per basepair per generation. We call

117 this dataset the ideal data. Second, we simulated five individuals and removed all variants that are  
118 in repetitive regions (using the repeatmask track for the human reference genome hg19 (SMIT *et*  
119 *al.* 2013)) to test how the model performs with missing data. Third, we simulated five individuals  
120 with missing data and using a varying recombination rate (using HapMap phase II (INTERNATIONAL  
121 HAPMAP *et al.* 2007) ) to test the effect of missing data and recombination. We binned all genomes  
122 into bins of 1000 bp, and removed all variants found in 500 simulated Africans, 100 simulated  
123 Europeans and 100 simulated Asians. We combine two haplotypes to form genotype data for the  
124 simulated individuals. This will be more similar to situations where phased data is not available.

125 We found the transition and emission parameters that optimized the likelihood, using the Baum-  
126 Welch algorithm and used them to get an estimate for the admixture time  $T_{admix}$ , the admixture  
127 proportion  $a$  and the mean coalescent times with the outgroup  $T_{Ingroup}$  and  $T_{Archaic}$  for the  
128 ingroup and archaic segments respectively, see Figure 2b.

129 Across all scenarios the mean estimated coalescence time between the ingroup and outgroup  
130 ( $T_{Ingroup}$ ) is 2,625 generations (max = 2,647, min = 2,595), while the corresponding average  
131 simulated coalescent time was 3,109 generations ago. For the coalescence time between the  
132 outgroup and the archaic ( $T_{Archaic}$ ) the mean estimate is 37,345 generations (max = 37,832, min =  
133 37,028) and the average simulated values was 35,543 generations ago.

134 We find that the mean estimate of the admixture proportion  $a$  when using the transition matrix is  
135 between 4.62 % and 5.34 %, consistent with the 5% simulation value.

136 We estimated the false negative rate of the model by counting the amount of simulated archaic  
137 segments that have zero overlap with the putative archaic sequence. This is 7.4 Mb for ideal  
138 simulations, 20.3 Mb for simulations with missing data and 17.5 Mb for simulations with missing  
139 data and a varying recombination rate, see Figure 2a. Most of this is in short segments which the  
140 model has less power to identify, as can be seen in Supporting figure 2.

141 If we estimate the false positive rate as the amount of inferred archaic segments that have zero  
142 overlap with the simulated archaic segments we find 16.6 Mb for ideal simulations, 13.2 Mb for  
143 simulations with missing data and 17.1 Mb for simulations with missing data and a varying  
144 recombination rate, see Figure 2a. We are therefore controlling for specificity (false positives)  
145 while losing sensitivity (false negatives) as the inference becomes more difficult. An example of

146 how the simulated and putative archaic segments overlap is shown in Figure 2c for a 10 Mb  
147 segment.

148 We also find that with a posterior decoding threshold at 0.8 (mean posterior probability of being  
149 archaic for all windows in segment), the amount of false positives can be reduced by up to 50%,  
150 while still keeping 90% of the true segments, see Supporting figure 3. When applying a threshold  
151 of 0.8 we recover 246 Mb, 202 Mb and 187 Mb of archaic sequence for Ideal simulations,  
152 simulations with missing data and simulations with missing data and varying recombination rate  
153 respectively. When applying a threshold of 0.8 we recover 246 Mb, 202 Mb and 187 Mb of archaic  
154 sequence for Ideal simulations, simulations with missing data and simulations with missing data  
155 and varying recombination rate respectively.

156 The mean estimate for the admixture time using the transition matrix is around 1,704 generations  
157 ago when using the ideal data and 1,522 generations ago when adding missing data. When we  
158 vary the recombination rate across the genome the average estimate of the admixture time is  
159 1,146 generations ago if we estimate it using the transition matrix. The underestimate of the  
160 admixture time might be due to fact that the model fail to identify around 80% of the short  
161 segments in such cases. This would make the average segment length longer and make the  
162 admixture time seem more recent.

163

#### 164 *Application to Papuan genomes*

165 Having verified the validity of the model, we applied it to 14 Papuan individuals from the Simons  
166 Genome Diversity Project (MALLICK *et al.* 2016), 40 Papuans from (MALASPINAS *et al.* 2016) and an  
167 additional 35 Papuans (VERNOT *et al.* 2016). In addition to this, we also analyzed individuals from  
168 West Eurasia, East Asia and South East Asia.

169 For each individual we used two different sets of variants as outgroup. We estimate the  
170 background mutation rate in windows of 100 kb, using the variant density of all variants in African  
171 populations from the 1000 Genomes Project.

172 Our model will not be able to distinguish Neanderthal from Denisova segments in Papuans,  
173 because the Denisovans and Neanderthals share a common ancestor before they do with humans

174 and therefore the mean coalescence time with humans will be the same (PRUFER *et al.* 2014). This  
175 means that the Poisson parameters will be the same as they both depend on  $T_{Archaic}$ . However,  
176 we should be able to enrich for Denisova and Neanderthal segments by using different outgroups  
177 in our filtering step.

178 First, we used only variants found in Sub-Saharan African populations as an outgroup. This should  
179 remove variation in the common ancestor of Sub-Saharan Africans and the Papuans, retaining  
180 archaic variants of Neanderthal and Denisova origin as both are present in Papuans, but mainly  
181 absent in Africa (SANKARARAMAN *et al.* 2016; VERNOT *et al.* 2016). We also used this filter when  
182 analyzing Eurasian populations.

183 Second we remove variants found in all non Papuan populations, only retaining variants that are  
184 unique to Papuan populations. This should remove Neanderthal variants that are shared with  
185 other non-African populations (PRUFER *et al.* 2014) and also to some extent remove variants of  
186 Denisovan origin that are found in Asians and Native Americans (SKOGLUND and JAKOBSSON 2011; QIN  
187 and STONEKING 2015). Thus removing all variants from the 1000 Genomes Project should enrich for  
188 Denisovan segments, while the segments that are found when using Sub-Saharan Africans but not  
189 using all 1000 Genomes Project samples as outgroups should be enriched for Neanderthal  
190 segments.

191 We found the optimal set of transition and emission parameters for each Papuan individual and  
192 found them to be largely consistent across the different datasets, see Supporting figure 4. The  
193 parameters were converted into estimates of  $T_{admix}$ ,  $a$ ,  $T_{Ingroup}$  and  $T_{Archaic}$  using an average  
194 recombination rate of  $1.2 \cdot 10^{-8}$  events per basepair per generation and an average mutation rate  
195 of  $1.25 \cdot 10^{-8}$  mutations per base pair per generation, see Figure 3a, b.

196 We find that mean coalescence time between Papuans and non-Papuan individuals happened  
197 more recently (1,395-1,540 generations ago) than the mean coalescence time with Sub-Saharan  
198 Africans (1,953-2,293 generations ago) reflecting that Papuans are more closely related to other  
199 Non-Africans than to Africans. The mean coalescence time between Papuans and other non-  
200 Africans also provides an upper limit for Neanderthal introgression because it happened into the  
201 common ancestor of these populations.



202 Using only Sub-Saharan individuals as an outgroup we find a mean coalescence time between the  
203 archaic and outgroup to be between 29,404 and 33,944 generations ago. When using non-  
204 Papuans as an outgroup the estimate is between 25,268 and 30,352 generations ago. The lower  
205 estimate is likely due to the fact that some of the variants in the common ancestor of Denisovans  
206 and Neanderthals have been removed.

207 Using Sub-Saharan Africans as an outgroup we estimate the total admixture proportion of archaic  
208 sequence into Papuans to be between 4.1-4.4 % and the admixture proportion that is private to  
209 Papuans between 1.5-1.8 %. This means that approximately 2.6 % is shared with non-Papuans,  
210 see Figure 3a.

211 From the transition parameters, we estimate that the admixture event with non-Africans  
212 happened 953-1,254 generations while the Papuan specific admixture event happened 888-1,191  
213 generation ago. Both are likely underestimates as it was for the simulated data with missing data  
214 and varying recombination rate. Neanderthal admixture likely occurred closer to 2,000  
215 generations ago after the out of Africa migration (FU *et al.* 2014; SANKARARAMAN *et al.* 2016) with  
216 Denisovan admixture occurring after that.

217 We used a threshold of 0.8 posterior probability as in the case of the simulated data. By  
218 comparing to the Vindija Neanderthal (PRUFER *et al.* 2017) and Denisova (MEYER *et al.* 2012)  
219 genomes we find that this cutoff removes around 65% of the segments that don't share variants  
220 with any archaic reference genome, see Supporting figure 5. These only contain 10.4 % of the total  
221 length of inferred archaic segments, and as well as including less confident segments may include  
222 deeply coalescing modern human haplotypes.

223 When we use a cutoff of 0.8 we find that 84 % of the segments unique to Papuans (80 % of the  
224 total sequence) shared more variants with the Denisova genome than with the Vindija  
225 Neanderthal, and that 78 % the segments that are shared with other non-Africans (83 % of the  
226 total sequence) shared more variants with the Vindija Neanderthal than the Denisova (Figure 3c).  
227 This is consistent with a majority of the archaic sequence unique to Papuans coming from a  
228 population more closely related to Denisovans, while a majority of the shared archaic sequence  
229 came from Neanderthals.

230 However, segments that are unique to Papuans are longer on average (94.2 kb) compared to  
 231 those shared with other non-African populations (76.9 kb), See Figure 3d. The difference in length  
 232 distributions are not seen as clearly when using Sstar or CRF, see Supporting figure 6. Moreover,  
 233 the length distribution of archaic segments that are not unique to Papuans are more similar to  
 234 other non-African populations, see Supporting figure 7.

235 We compared our archaic segments to those previously reported using other methods  
 236 (SANKARARAMAN *et al.* 2016; VERNOT *et al.* 2016). We find that 67% of the archaic sequence found  
 237 using CRF are also recovered using our method, and that 74% of the archaic sequence found using  
 238 Sstar are also recovered using our method.

239 Comparing to the archaic reference genomes our method finds more Denisova in Papuans than it  
 240 finds Neanderthal, unlike the CRF. It also finds a significant amount of additional Denisova  
 241 segments in East and South East Asians, see Table 1.

242

| <i>Model</i> | <i>Pop</i>  | <i>Both</i> | <i>Denisova</i> | <i>None</i> | <i>Vindija</i> | <i>Total</i> |
|--------------|-------------|-------------|-----------------|-------------|----------------|--------------|
| <i>HMM</i>   | Papuan      | 4.40        | 77.00           | 11.39       | 71.44          | 164.23       |
|              | eastasia    | 1.48        | 5.69            | 9.96        | 61.37          | 78.49        |
|              | southasia   | 1.62        | 5.85            | 10.12       | 51.36          | 68.95        |
|              | westeurasia | 1.47        | 2.39            | 10.14       | 43.95          | 57.94        |
| <i>Sstar</i> | Papuan      | 26.5        | 43.11           | -           | 49.21          | 118.82       |
|              | eastasia    | -           | 0.00            | -           | 65.02          | 65.02        |
|              | southasia   | -           | 0.00            | -           | 55.18          | 55.18        |
|              | westeurasia | -           | 0.00            | -           | 51.23          | 51.23        |
| <i>CRF</i>   | Papuan      | -           | 58.17           | -           | 84.72          | 142.89       |
|              | eastasia    | -           | 3.21            | -           | 72.92          | 76.14        |
|              | southasia   | -           | 2.79            | -           | 61.36          | 64.15        |
|              | westeurasia | -           | 0.68            | -           | 57.29          | 57.97        |

243

244 **Table 1. Amount of sequence of different origins.** The amount of sequence (in Mb) that is equally  
 245 related to Denisova and Vindija, more closely related to Denisova, doesn't share any variation with  
 246 either and is more closely related to Vindija are shown different populations and different  
 247 methods.

248

249 **Discussion**

250 Since emission probabilities are very different between the human and archaic states in our  
251 model, we expect a low rate of false positive archaic inference, and this is also what we see in  
252 simulations. However, since recombination rates are highly variable, we expect many very short  
253 archaic segments and these have a very high false negative rate. Our inability to identify these  
254 causes us to underestimate the admixture time. However, the model does seem to find the  
255 correct size distribution for longer segments (> 50 kb), see Supporting figure 2. The mean  
256 coalescence times of modern and archaic humans are reasonably well estimated in simulations.  
257 One issue of interest is that the potential presence of super-archaic introgression as reported into  
258 the sequenced Denisovan (PRUFER *et al.* 2014) should cause the mean coalescence time to  
259 Denisovan introgressed segments to be greater than that for Neanderthal segments. We did not  
260 observe this, perhaps because some Denisovan admixture is also present in East Asians who form  
261 part of our contrast population, reducing apparent mean divergence.

262 Our model reports more Denisova segments than approaches relying on the Denisovan reference.  
263 This is possibly because our method does not rely on putative Denisova segments being more  
264 closely related to the Denisova genome than the Vindija Neanderthal genome. Given that the  
265 introgressing "Denisovan" and the sequenced Denisova individual's lineages split relatively shortly  
266 after the Neanderthals split from Denisovans (PRUFER *et al.* 2014) many segments may be equally  
267 close to the Vindija Neanderthal and the sequenced Denisova sample. It is also expected that a  
268 fraction of segments introgressed from the Denisovan are more closely related to Vindija and vice  
269 versa due to incomplete lineage sorting. It is therefore also reassuring that we do not find the  
270 same large excess of Neanderthal fragments in Papuans compared to Asian populations as has  
271 been reported previously, see Table 1.

272 We find no clear evidence for an introgression with a new archaic hominin in Papuans, but we do  
273 find segments that do not share variation with any of the sequenced archaic populations. These  
274 segments could represent variation in Neanderthals and Denisovans that is not captured by the  
275 three high coverage archaic reference genomes, or another source. In the future it will be  
276 interesting to compare these segments to other human populations that might also have archaic  
277 segments of unknown origin (HSIEH *et al.* 2016; MONDAL *et al.* 2016).

278 Our model is not restricted to being applied to humans. It works particularly well when it is  
279 possible to remove all the common variation between the ingroup and outgroup. As a larger  
280 number of individuals from different species are being sequenced, this method could be used as  
281 an alternative method for identifying introgression in other species, for example chimp and  
282 bonobo (DE MANUEL *et al.* 2016), bears (LIU *et al.* 2014), elephants (PALKOPOULOU *et al.* 2018) or  
283 gibbons (CARBONE *et al.* 2014).  
284

285 **Materials and methods**

286 **Simulations**

287 To simulate data we used Msprime (KELLEHER *et al.* 2016). We simulated 5 Papuans and as an  
288 outgroup we simulated 500 Africans, 100 Europeans and 100 Asians using demographic  
289 parameters from (MALASPINAS *et al.* 2016). We simulated data where we varied the recombination  
290 rate according to HapMap recombination maps (INTERNATIONAL HAPMAP *et al.* 2007) for 5 individuals  
291 and removed variants within non-callable regions and variants that were found in the simulated  
292 outgroup. We grouped all autosomes into bins of 1000 base pairs and counted the number of  
293 variants. For each 1000 bp window we calculated the number of called bases using the repeat  
294 masked segments.

295

296 **Train parameters and decode segments**

297 We trained and decoded the segments using our HMM, which is available at:

298 <https://github.com/LauritsSkov/Introgression-detection/>

299

300 **Data sets**

301 We used 14 Papuans, 71 WestEurasians, 72 East Asians and 39 South Asians individuals from the  
302 Simons Genome Diversity Project (SGDP) (MALLICK *et al.* 2016), 40 Papuans from (MALASPINAS *et al.*  
303 2016) and an additional 35 Papuans (VERNOT *et al.* 2016).

304

305 **Filtering variants in real data**

306 We used two sets of outgroups. One is all Sub-Saharan Africans (populations: YRI, MSL, ESN) from  
307 the 1000 Genomes Project (GENOMES PROJECT *et al.* 2015) and all Sub-Saharan African populations  
308 from SGDP (MALLICK *et al.* 2016) except Masai, Somali, Sharawi and Mozabite, which show signs of  
309 out-of-Africa admixture. The other outgroup is all individuals from the 1000 Genomes Project  
310 (GENOMES PROJECT *et al.* 2015) plus all non-Papuans from SGDP. For all human data sets, we also  
311 removed sites that fell within repeatmasked (SMIT *et al.* 2013) regions, and sites that were not in  
312 the strict callability mask for the 1000 Genomes Project.

313

314 Repeat mask regions

315 [hgdownload.cse.ucsc.edu/goldenpath/hg19/bigZips/chromFaMasked.tar.gz](http://hgdownload.cse.ucsc.edu/goldenpath/hg19/bigZips/chromFaMasked.tar.gz)

316

317 Strict callability mask for 1000 genomes:

318 [ftp://ftp.1000genomes.ebi.ac.uk/vol1/ftp/release/20130502/supporting/accessible\\_genome\\_mas](ftp://ftp.1000genomes.ebi.ac.uk/vol1/ftp/release/20130502/supporting/accessible_genome_masks/StrictMask/)  
319 [ks/StrictMask/](ftp://ftp.1000genomes.ebi.ac.uk/vol1/ftp/release/20130502/supporting/accessible_genome_masks/StrictMask/)

320

321 The background mutation rate was calculated using the variants density of all variants from  
322 populations YRI, LWK, GWD, MSL and ESN in windows of 100 Kb divided by the mean variant  
323 density of the whole genome.

324

### 325 **Comparison to Sstar and Conditional Random Field**

326 We called Neanderthal and Denisova segments in the 14 Papuans and compared them to the  
327 segments called with CRF with more than 50 posterior probability (SANKARAMAN *et al.* 2016)  
328 available at:

329 <https://sriramlab.cass.idre.ucla.edu/public/sankaraman.curbio.2016/>

330 The path to the haplotypes is:

331 `summaries/2/denisova/oceania/summaries/haplotypes/CRHOM.thresh-50.length-0.00.haplotypes`

332

333 We called Neanderthal and Denisova segments in the 35 Papuans and compared them to the  
334 segments called with Sstar with more than 99 posterior probability (VERNOT *et al.* 2016) available  
335 at:

336 [https://drive.google.com/drive/folders/OB9Pc7\\_zltMCVWUp6bWtXc2xJVkk](https://drive.google.com/drive/folders/OB9Pc7_zltMCVWUp6bWtXc2xJVkk)

337 The path to the haplotypes is:

338 `introgressed_haplotypes/LL.callsetPNG.mr_0.99.den_calls_by_hap.bed.merged.by_chr.bed`

339

340

341 **Acknowledgments**

342 RD was supported by Wellcome Trust grants WT206194 and RG89781. LS was supported by grants  
343 1323-00076 and 6108-00385 from the Danish Council for Independent Research, Natural Sciences  
344 (To MHS).

345  
346 **Figure legends**

347 **Figure 1. Overview of the model.** Illustration on small test dataset. a) An archaic segment  
348 introgresses into the ingroup population at time  $T_{admix}$  with admixture proportion  $a$ . The  
349 segments in the ingroup have a mean coalescence time with a segment from the outgroup at time  
350  $T_{Ingroup}$  and an archaic segment has a mean coalescence time with a segment from the outgroup  
351 at time  $T_{Archaic}$ . Removing all variants found in the outgroup (light orange points) should remove  
352 all the variants in the common ancestor of ingroup and outgroup, leaving only private variants that  
353 either occurred on the ingroup branch (dark orange) or on the archaic branch (dark blue). This will  
354 make the archaic segment have a higher variant density. The genome is then binned into windows  
355 of  $L$  (here 1000 bp) and the number of private variants are counted in each window. These are the  
356 observations and the hidden states are either Ingroup state or Archaic state. When decoding the  
357 sequence the most likely path through the sequence is found. b) The transition matrix between  
358 the archaic state and ingroup state. c) The emission probabilities are modelled as Poisson  
359 distributions with means  $\lambda_{Ingroup}$  and  $\lambda_{Archaic}$ . It is more likely to see more private variants in the  
360 Archaic state than in the Ingroup state.

361

362 **Figure 2. Evaluation of the model on simulated data.** a) Average amount of sequence per  
363 individual that come from segments that are classified as false archaic (zero percent overlap with  
364 any true archaic segment), found < 50% (segment where there is less than 50 % overlap with true  
365 archaic segments), found > 50 % (segments where more than 50 % overlap with true archaic  
366 segments) and missed archaic which are segments that the model does not identify as archaic. The  
367 bars are colored according to what simulation scenarios they belong to. b) The estimation of the  
368 four parameters  $T_{admix}$ ,  $a$ ,  $T_{Ingroup}$  and  $T_{Archaic}$  are shown for the different simulation scenarios.  
369 c) An example of how simulated archaic segments and putative archaic segments overlap in a 10

370 Mb window. The x-axis is the genomic coordinates in Mb and the y-axis is the different simulation  
371 scenarios.

372

373 **Figure 3. Application of model to Papuan genomes.** a) Relationship between modern and archaic  
374 humans with the outgroup branches (Sub-Saharan Africans) colored in red. The average  
375 coalescence times for ingroup and outgroup  $T_{Ingroup}$  and archaic and outgroup  $T_{Archaic}$  are  
376 shown. The admixture proportions  $a$  and admixture time  $T_{admix}$  are shown for segments that are  
377 shared with other non-African populations. b) The outgroup colored in red is now all non-Papuans,  
378 and the new demographic parameters are shown. c) The segments that are shared with other  
379 Non-Africans share more variation with the Vindija Neanderthal than they do with the Altai  
380 Denisova. Segments that are unique to Papuan individuals share more variation with Altai  
381 Denisova than they do with the Vindijaarchaic segments with a mean posterior probability  $> 0.5$   
382 are kept) for segments that are shared with other non-African populations is shorter than  
383 segments that are unique to Papuans. segments with a mean posterior probability  $> 0.5$  are kept)  
384 for segments that are shared with other non-African populations is shorter than segments that are  
385 unique to Papuans.

386

### 387 **Supporting Figure legends**

388 **Supporting figure 1 – Demographic parameters for simulation.** The effective population sizes,  
389 split times and bottleneck population sizes are shown for the simulated populations.

390 **Supporting figure 2 - Total segments and sequence called SIM.** The first column show the total  
391 number of segments found and the second column show the total amount of sequence that these  
392 segments add up to. The rows are different simulation scenarios and the colors of the stacked bar  
393 plot show the amount/number of segments that are not found using posterior decoding, where  
394 less than half of the segment overlap with the true archaic segments or where more than half of  
395 the segment overlaps with the true archaic segment.

396 **Supporting figure 3 – Effect of adjusting cutoff for when to include a putative archaic segment.**

397 The rows are different simulation scenarios and the columns are different classifications of



398 putative archaic segments. False is segments with zero overlap to the true archaic segments,  
399 found<50% are archaic segments that overlap with less than 50% with the true archaic segments  
400 and found>50% are segments that overlap with more than 50% with the true archaic segments.  
401 On the x-axis is the mean posterior probability of an archaic segment and the y-axis is the amount  
402 of sequence left when applying the filter as a fraction of that found with a filter value of 50%.

403 **Supporting figure 4 - Parameter estimation of Papuans.** The different subpanels show the  
404 estimates for the parameters  $t_{\text{admix}}$ ,  $a$ ,  $T_{\text{ingroup}}$  and  $T_{\text{archaic}}$  depending on which outgroup  
405 was used (Sub-Saharan Africans) or the whole world (non-Papuans). There is a separate bar for  
406 each individual, and the bars are colored according to which dataset they came from.

407 **Supporting figure 5 - Segment distributions as a function of posterior probability.** Distributions of  
408 the number (left) and total length (right) of segments with mean posterior probability as on the x  
409 axis. Numbers are given for all 87 Papuans, called with a threshold of 0.5.

410 **Supporting figure 6 - Length distribution of inferred segments for other methods.** The length  
411 distribution of all Denisova and Neanderthal segments found using conditional random field (CRF),  
412 the hidden Markov model (HMM) and Sstar. For our HMM, Neanderthal are those segments that  
413 are shared with other non-African populations and Denisova are those unique to Papuans.

414 **Supporting figure 7 - Length distribution of Asians, Europeans and Papuans.** The length  
415 distributions of segments unique to Papuans (Denisova) and segments shared with other non-  
416 African populations (Neanderthal) are shown for segments found using four different population  
417 groups.

418

## 419 References

- 420 Carbone, L., R. A. Harris, S. Gnerre, K. R. Veeramah, B. Lorente-Galdos *et al.*, 2014 Gibbon genome  
421 and the fast karyotype evolution of small apes. *Nature* 513: 195-201.
- 422 Clarkson, C., M. Smith, B. Marwick, R. Fullagar, L. A. Wallis *et al.*, 2015 The archaeology,  
423 chronology and stratigraphy of Madjedbebe (Malakunanja II): A site in northern Australia  
424 with early occupation. *J Hum Evol* 83: 46-64.
- 425 Dannemann, M., K. Prufer and J. Kelso, 2017 Functional implications of Neandertal introgression in  
426 modern humans. *Genome Biol* 18: 61.
- 427 de Manuel, M., M. Kuhlwilm, P. Frandsen, V. C. Sousa, T. Desai *et al.*, 2016 Chimpanzee genomic  
428 diversity reveals ancient admixture with bonobos. *Science* 354: 477-481.
- 429 Fu, Q., H. Li, P. Moorjani, F. Jay, S. M. Slepchenko *et al.*, 2014 Genome sequence of a 45,000-year-  
430 old modern human from western Siberia. *Nature* 514: 445-449.
- 431 Genomes Project, C., A. Auton, L. D. Brooks, R. M. Durbin, E. P. Garrison *et al.*, 2015 A global  
432 reference for human genetic variation. *Nature* 526: 68-74.
- 433 Hsieh, P., A. E. Woerner, J. D. Wall, J. Lachance, S. A. Tishkoff *et al.*, 2016 Model-based analyses of  
434 whole-genome data reveal a complex evolutionary history involving archaic introgression  
435 in Central African Pygmies. *Genome Res* 26: 291-300.
- 436 Huerta-Sanchez, E., X. Jin, Asan, Z. Bianba, B. M. Peter *et al.*, 2014 Altitude adaptation in Tibetans  
437 caused by introgression of Denisovan-like DNA. *Nature* 512: 194-197.
- 438 International HapMap, C., K. A. Frazer, D. G. Ballinger, D. R. Cox, D. A. Hinds *et al.*, 2007 A second  
439 generation human haplotype map of over 3.1 million SNPs. *Nature* 449: 851-861.
- 440 Kelleher, J., A. M. Etheridge and G. McVean, 2016 Efficient Coalescent Simulation and Genealogical  
441 Analysis for Large Sample Sizes. *PLoS Comput Biol* 12: e1004842.
- 442 Malaspinas, A. S., M. C. Westaway, C. Muller, V. C. Sousa, O. Lao *et al.*, 2016 A genomic history of  
443 Aboriginal Australia. *Nature* 538: 207-214.
- 444 Mallick, S., H. Li, M. Lipson, I. Mathieson, M. Gymrek *et al.*, 2016 The Simons Genome Diversity  
445 Project: 300 genomes from 142 diverse populations. *Nature* 538: 201-206.
- 446 Meyer, M., M. Kircher, M. T. Gansauge, H. Li, F. Racimo *et al.*, 2012 A high-coverage genome  
447 sequence from an archaic Denisovan individual. *Science* 338: 222-226.
- 448 Mondal, M., F. Casals, T. Xu, G. M. Dall'Olio, M. Pybus *et al.*, 2016 Genomic analysis of  
449 Andamanese provides insights into ancient human migration into Asia and adaptation. *Nat*  
450 *Genet* 48: 1066-1070.
- 451 O'Connell, J. F., and J. Allen, 2015 The process, biotic impact, and global implications of the human  
452 colonization of Sahul about 47,000 years ago. *Journal of Archaeological Science* 56: 73-84.
- 453 Plagnol, V., and J. D. Wall, 2006 Possible ancestral structure in human populations. *PLoS Genet* 2:  
454 e105.
- 455 Prufer, K., C. de Filippo, S. Grote, F. Mafessoni, P. Korlevic *et al.*, 2017 A high-coverage Neandertal  
456 genome from Vindija Cave in Croatia. *Science*.
- 457 Prufer, K., F. Racimo, N. Patterson, F. Jay, S. Sankararaman *et al.*, 2014 The complete genome  
458 sequence of a Neanderthal from the Altai Mountains. *Nature* 505: 43-49.
- 459 Qin, P., and M. Stoneking, 2015 Denisovan Ancestry in East Eurasian and Native American  
460 Populations. *Mol Biol Evol* 32: 2665-2674.
- 461 Racimo, F., D. Gokhman, M. Fumagalli, A. Ko, T. Hansen *et al.*, 2017 Archaic Adaptive Introgression  
462 in TBX15/WARS2. *Mol Biol Evol* 34: 509-524.

- 463 Sankararaman, S., S. Mallick, N. Patterson and D. Reich, 2016 The Combined Landscape of  
464 Denisovan and Neanderthal Ancestry in Present-Day Humans. *Curr Biol* 26: 1241-1247.
- 465 Seguin-Orlando, A., T. S. Korneliussen, M. Sikora, A. S. Malaspinas, A. Manica *et al.*, 2014  
466 Paleogenomics. Genomic structure in Europeans dating back at least 36,200 years. *Science*  
467 346: 1113-1118.
- 468 Skoglund, P., and M. Jakobsson, 2011 Archaic human ancestry in East Asia. *Proc Natl Acad Sci U S A*  
469 108: 18301-18306.
- 470 Smit, A. F. A., R. Hubley and P. Green, 2013 RepeatMasker Open 4.0. RepeatMasker Open 4.0.
- 471 Vernet, B., S. Tucci, J. Kelso, J. G. Schraiber, A. B. Wolf *et al.*, 2016 Excavating Neandertal and  
472 Denisovan DNA from the genomes of Melanesian individuals. *Science* 352: 235-239.
- 473

### a Overview of the model

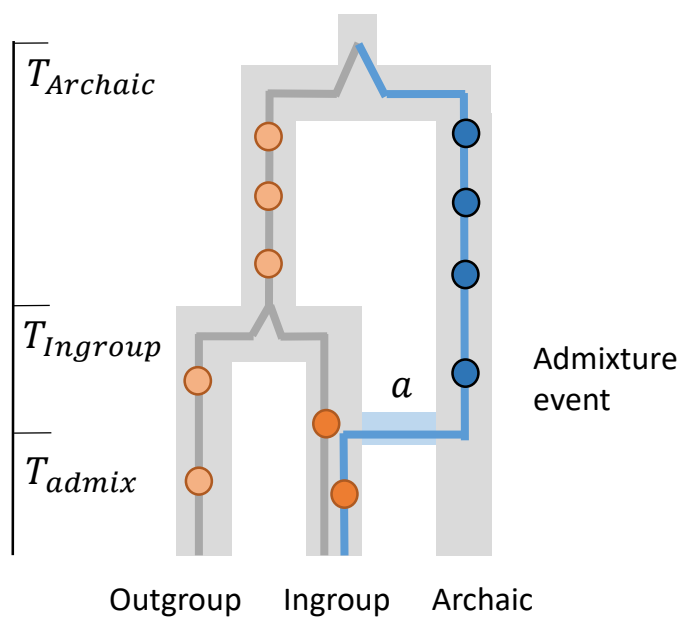

Observed variants

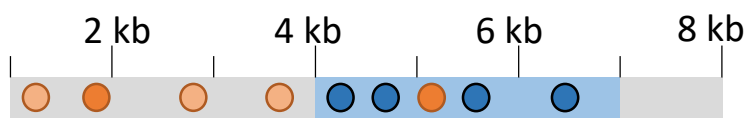

Remove variants found in outgroup

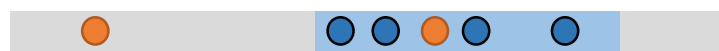

Count variants in window

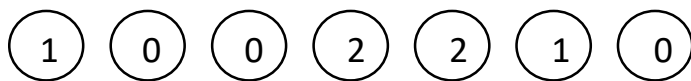

Decode sequence

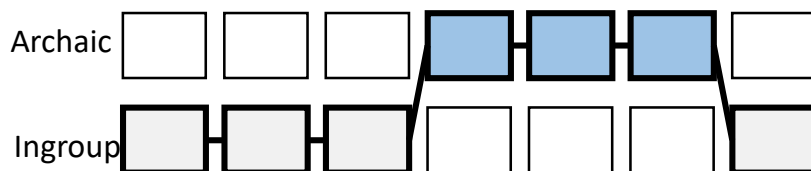

### b Transition probabilities

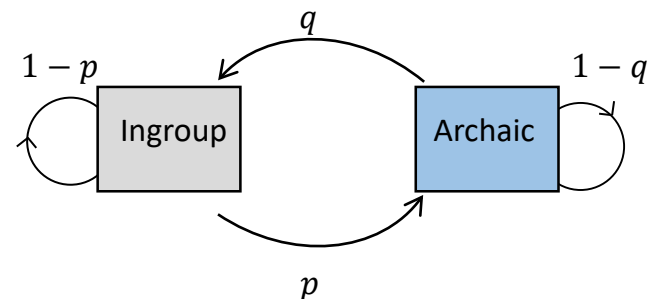

$$q \approx T_{admix} \cdot r \cdot L \cdot (1 - a)$$

$$p \approx T_{admix} \cdot r \cdot L \cdot a$$

### c Emission probabilities

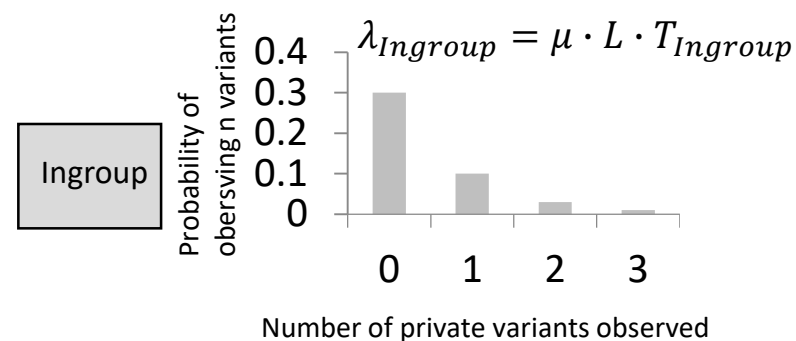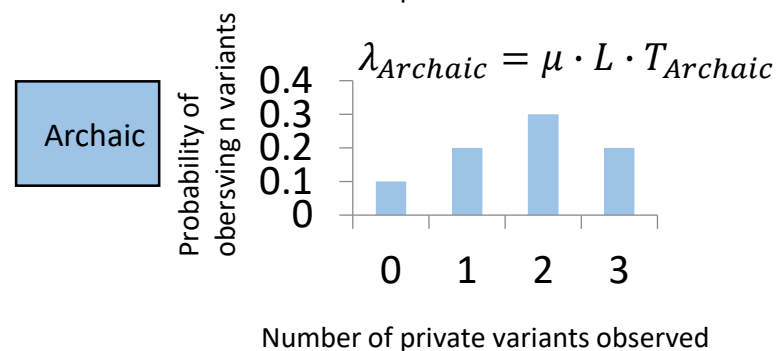

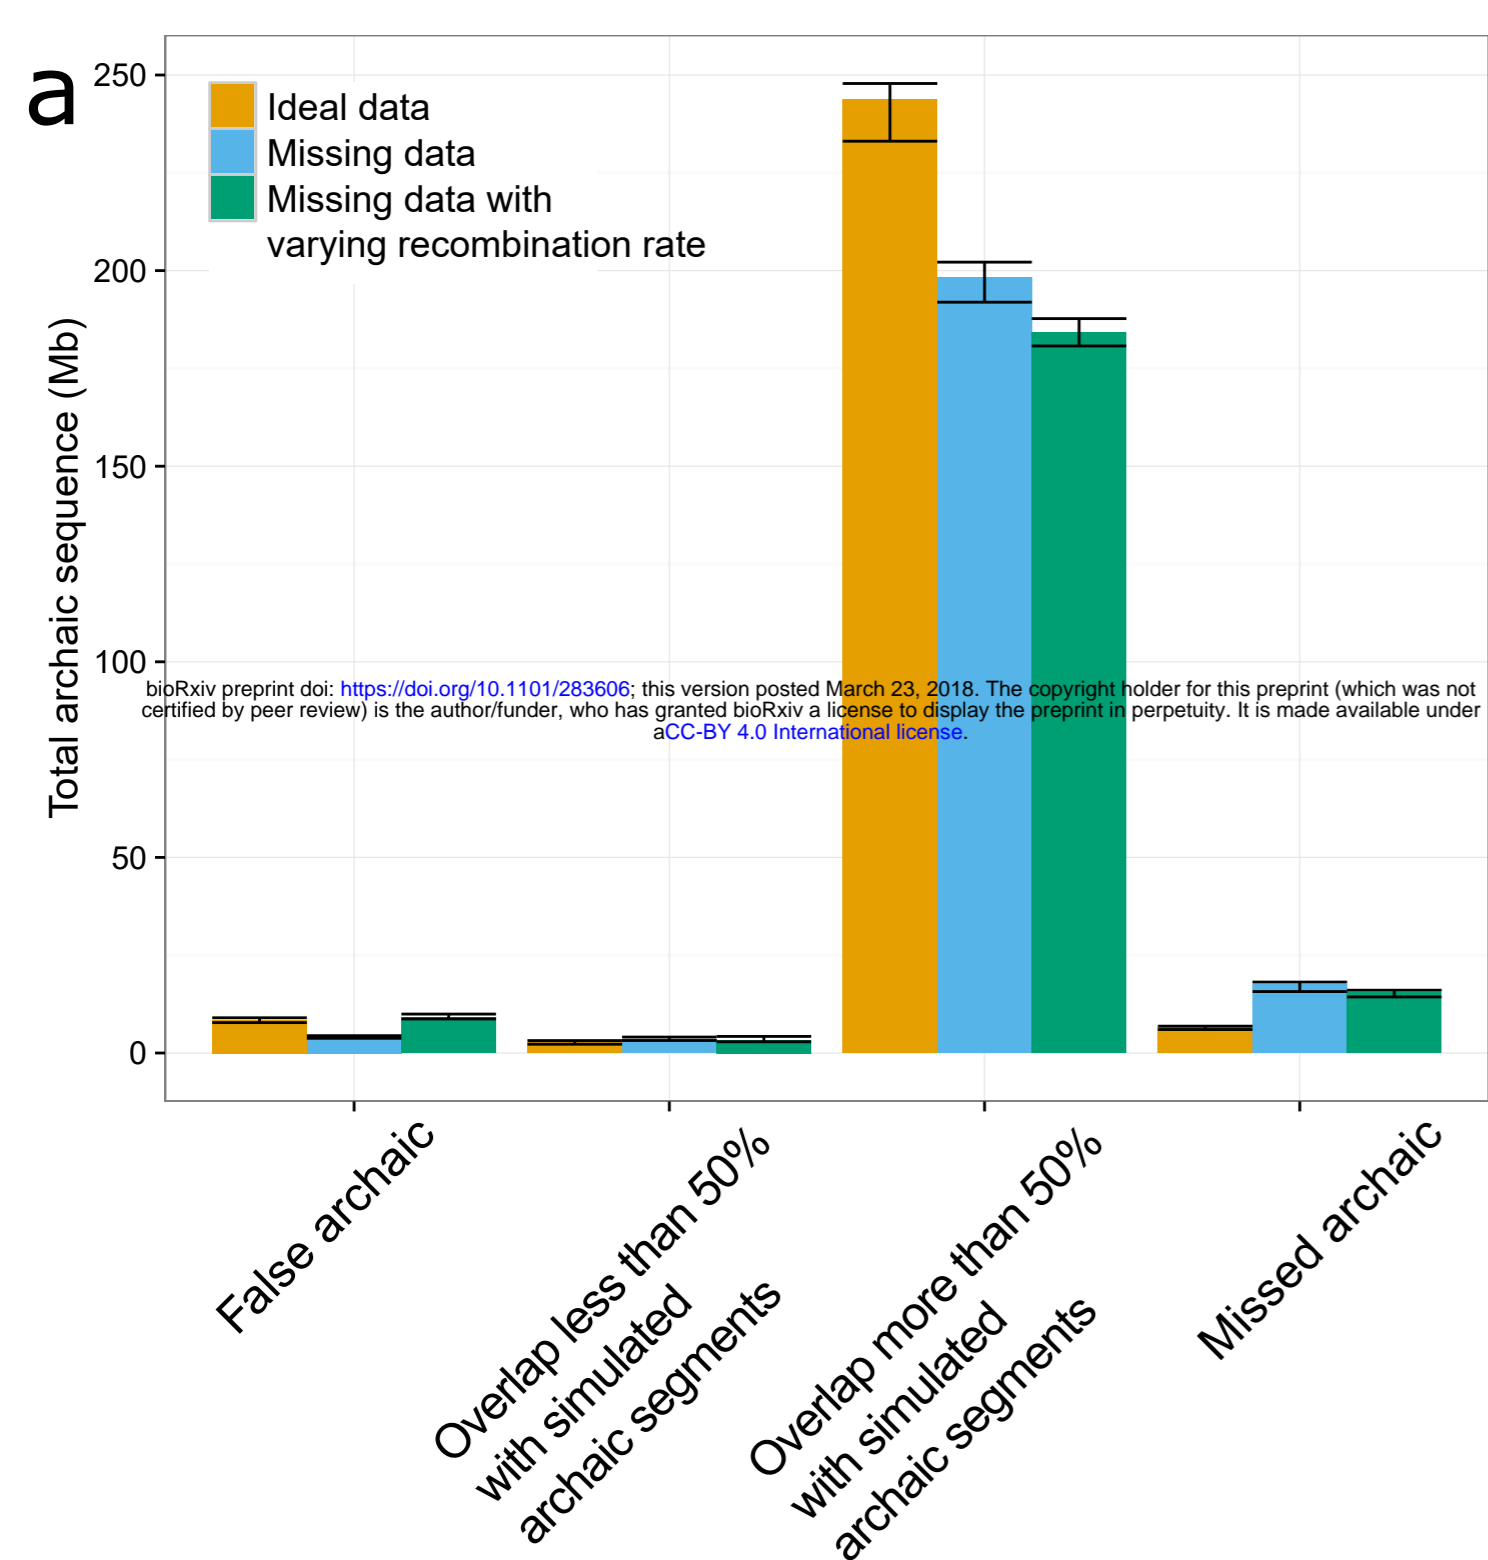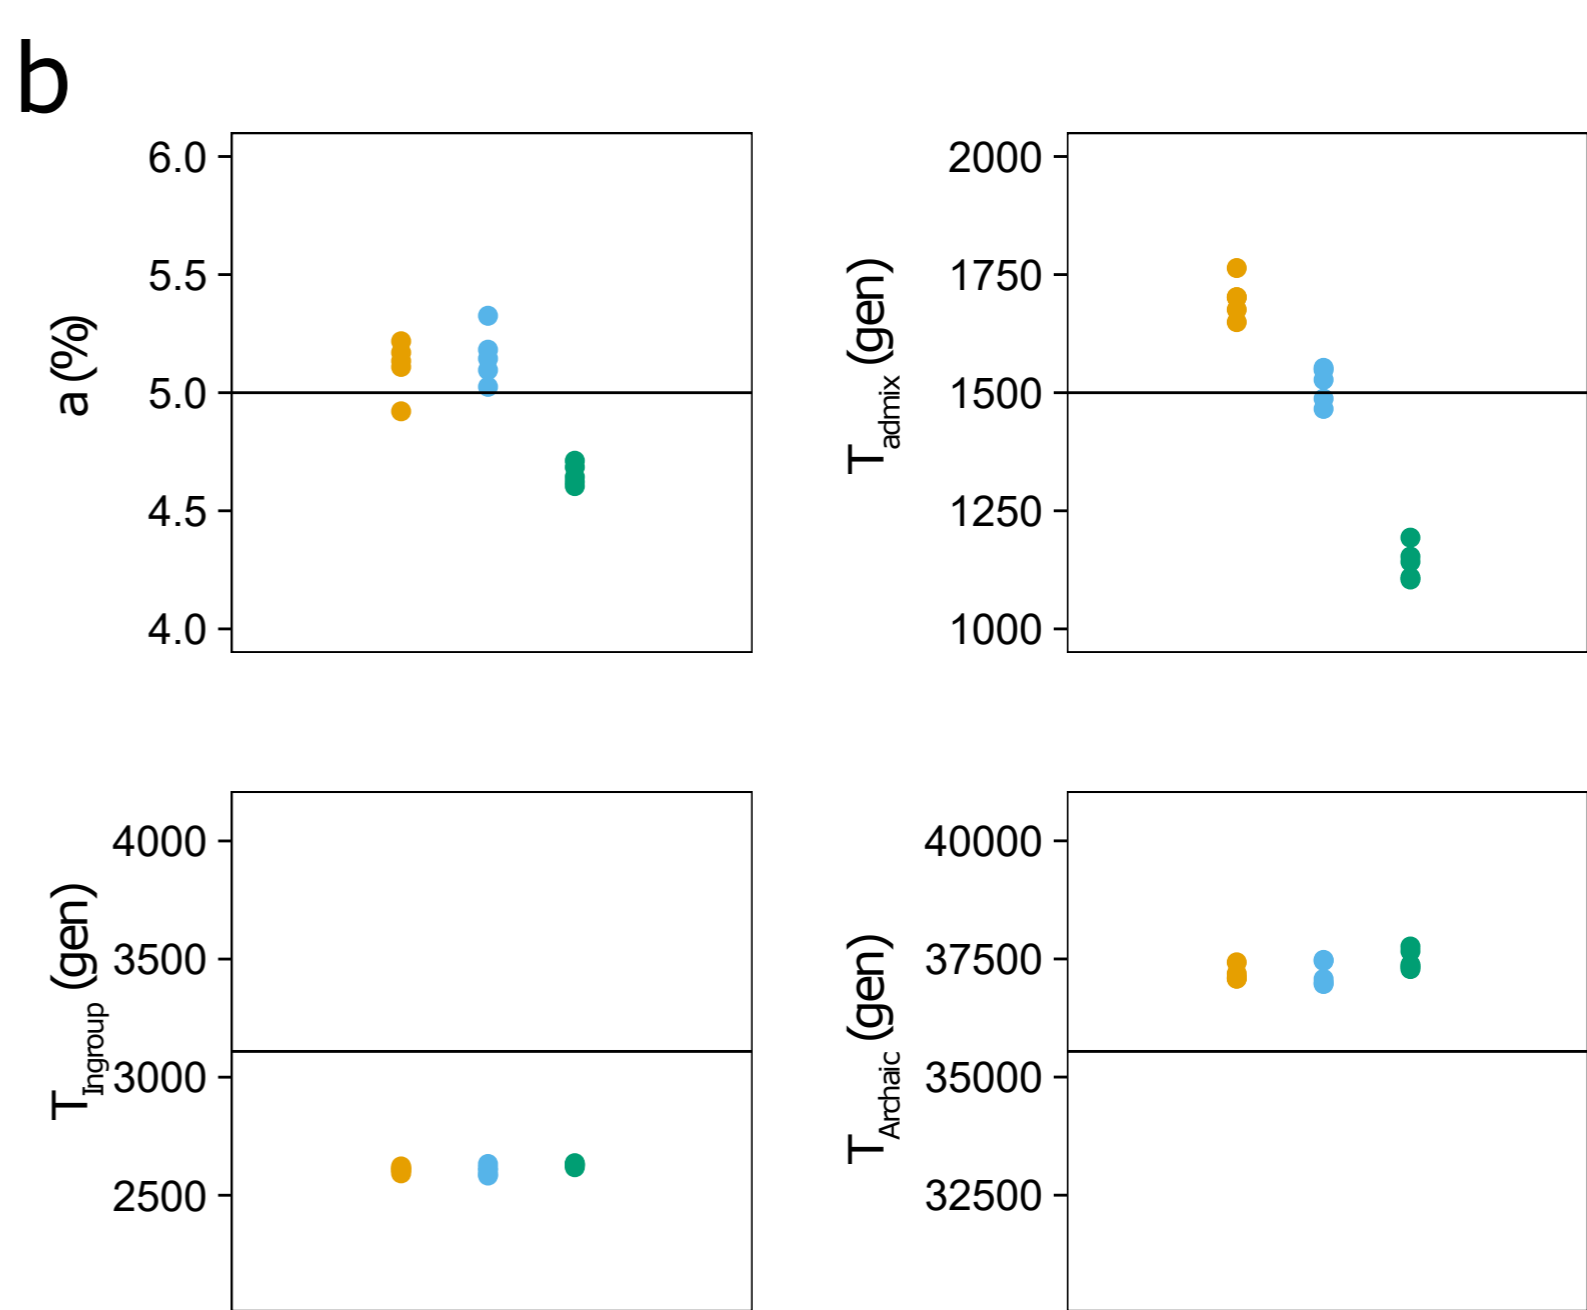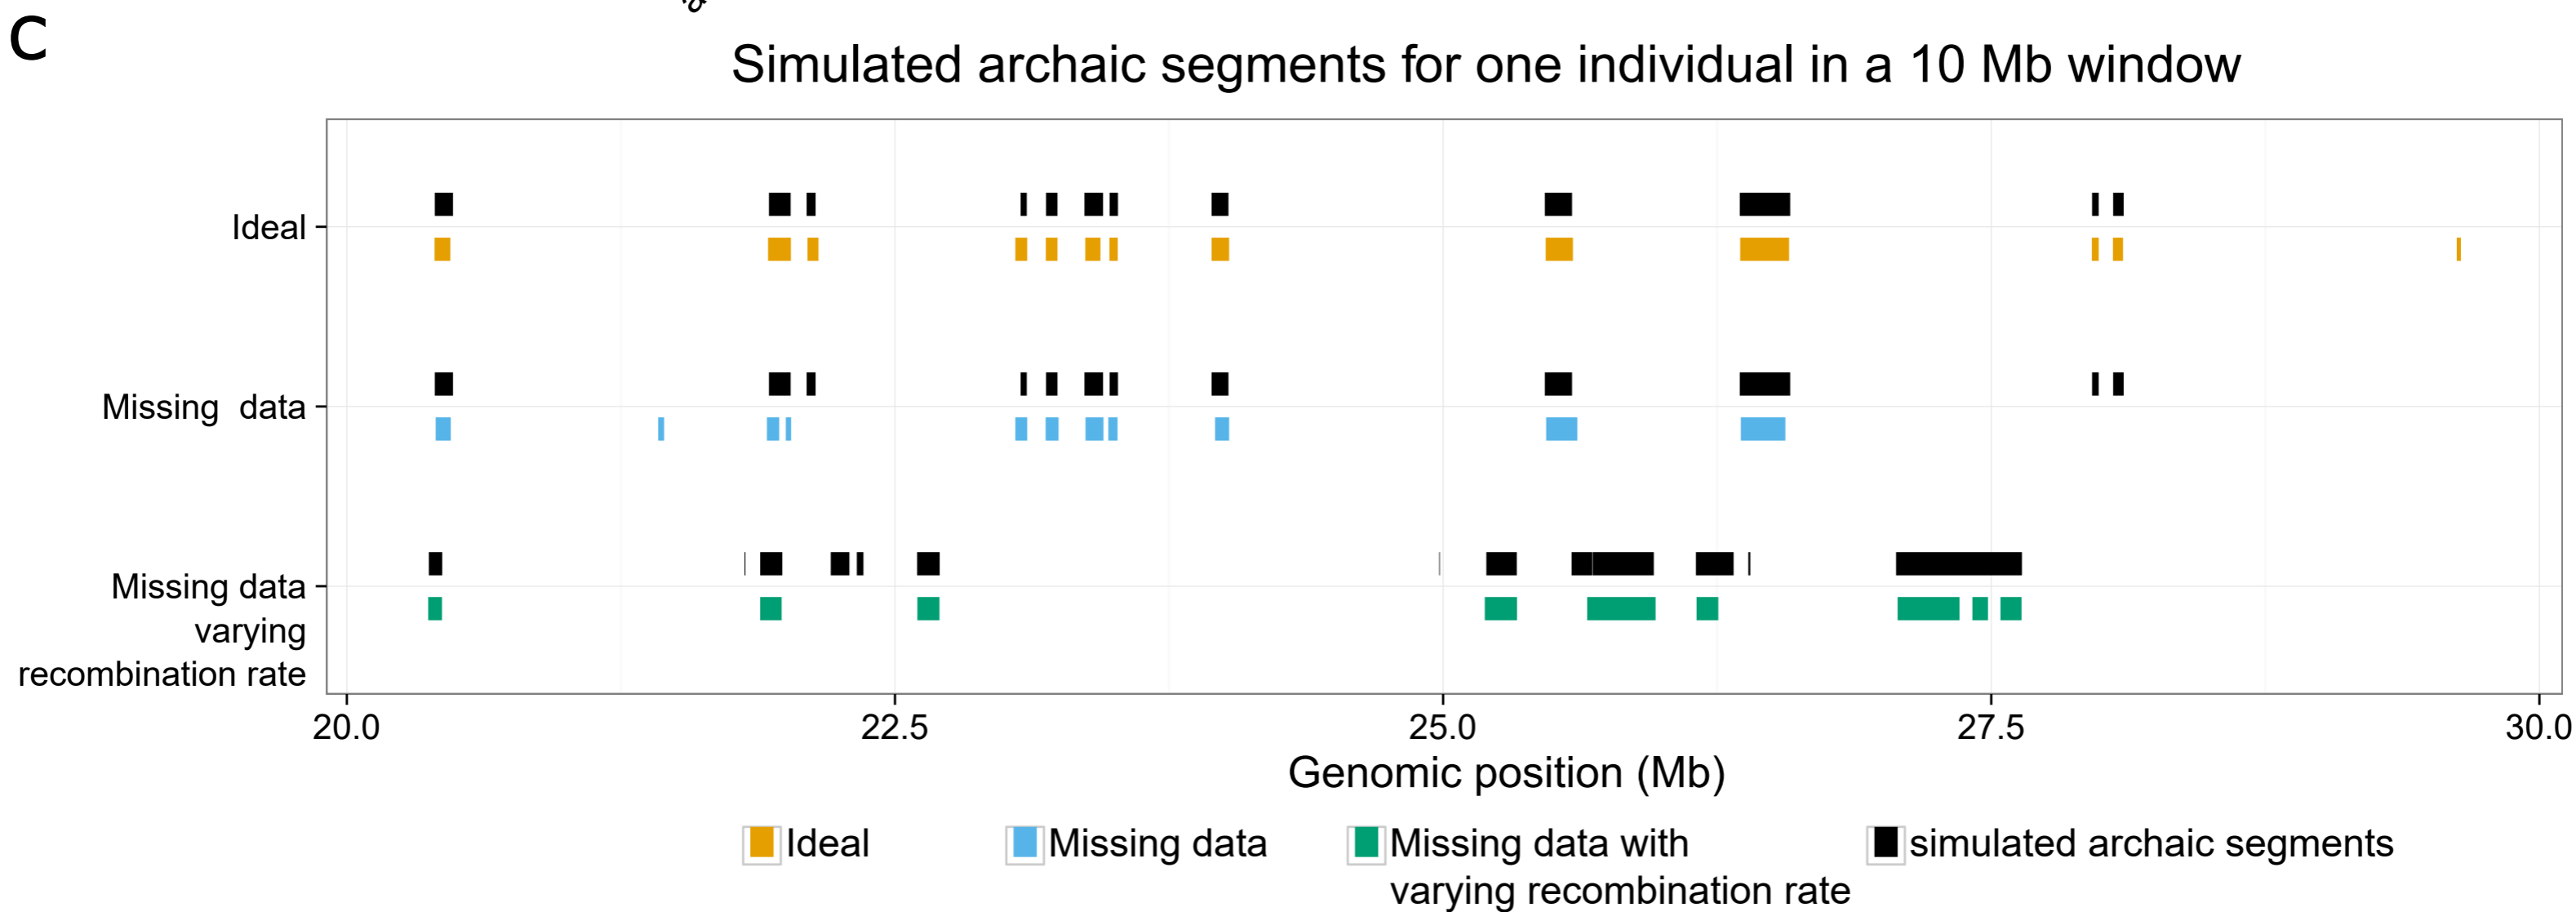

**a** Using Africans as outgroup

$T_{\text{Archaic}} = 29,404 - 33,944$   
generations ago

$T_{\text{Ingroup}} = 1,953 - 2,293$   
generations ago

$T_{\text{Admix}} = 953 - 1254$   
generations ago

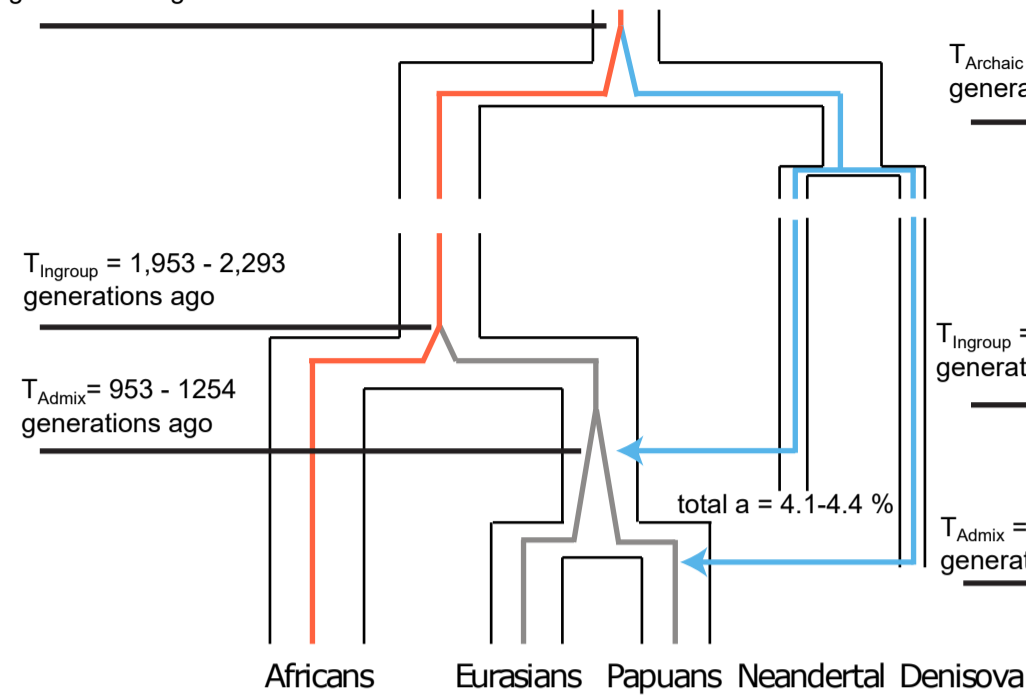

**b** Using Non-Papuans as outgroup

$T_{\text{Archaic}} = 25,268 - 30,352$   
generations ago

$T_{\text{Ingroup}} = 1,395 - 1,540$   
generations ago

$T_{\text{Admix}} = 888 - 1191$   
generations ago

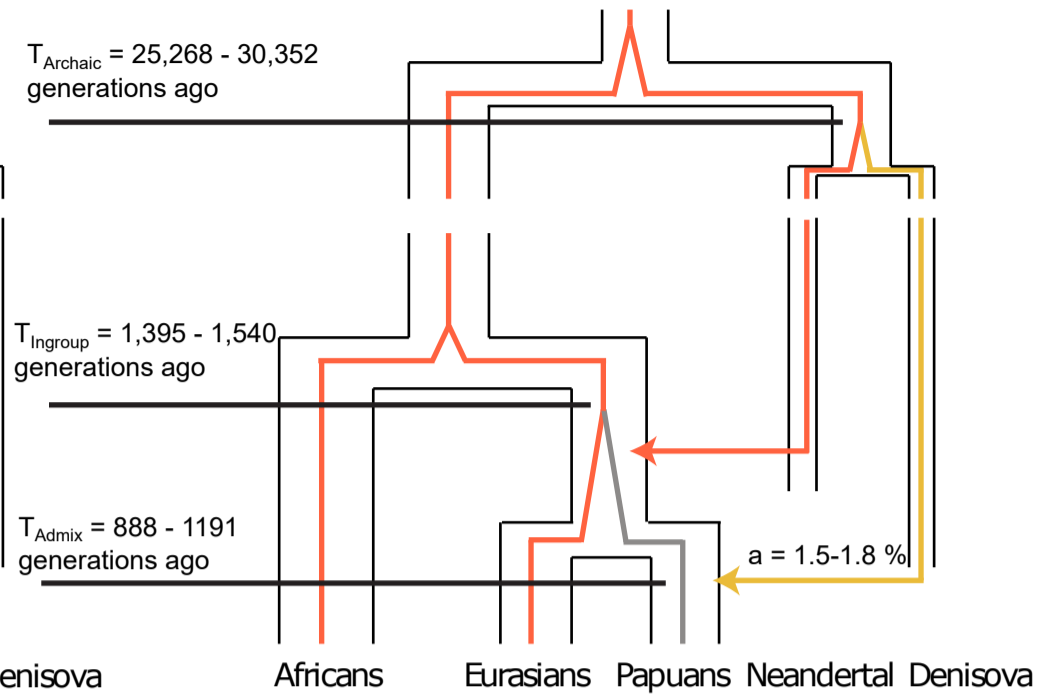

**c**

Shared with other Non-Africans

Unique to Papuans

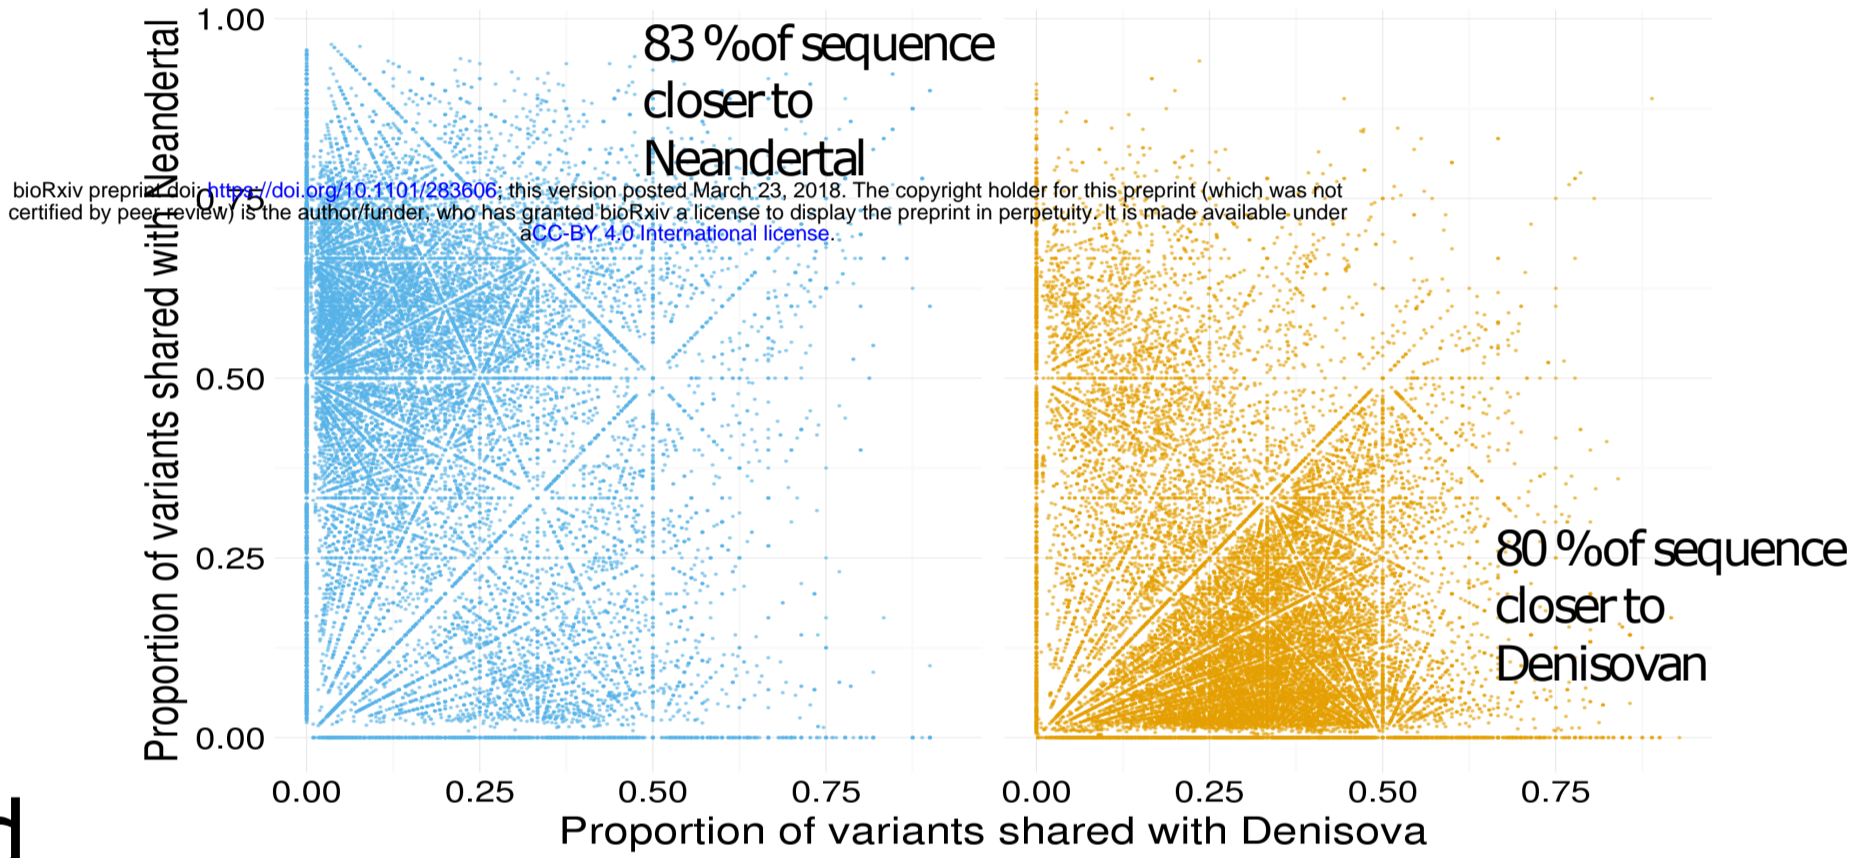

**d**

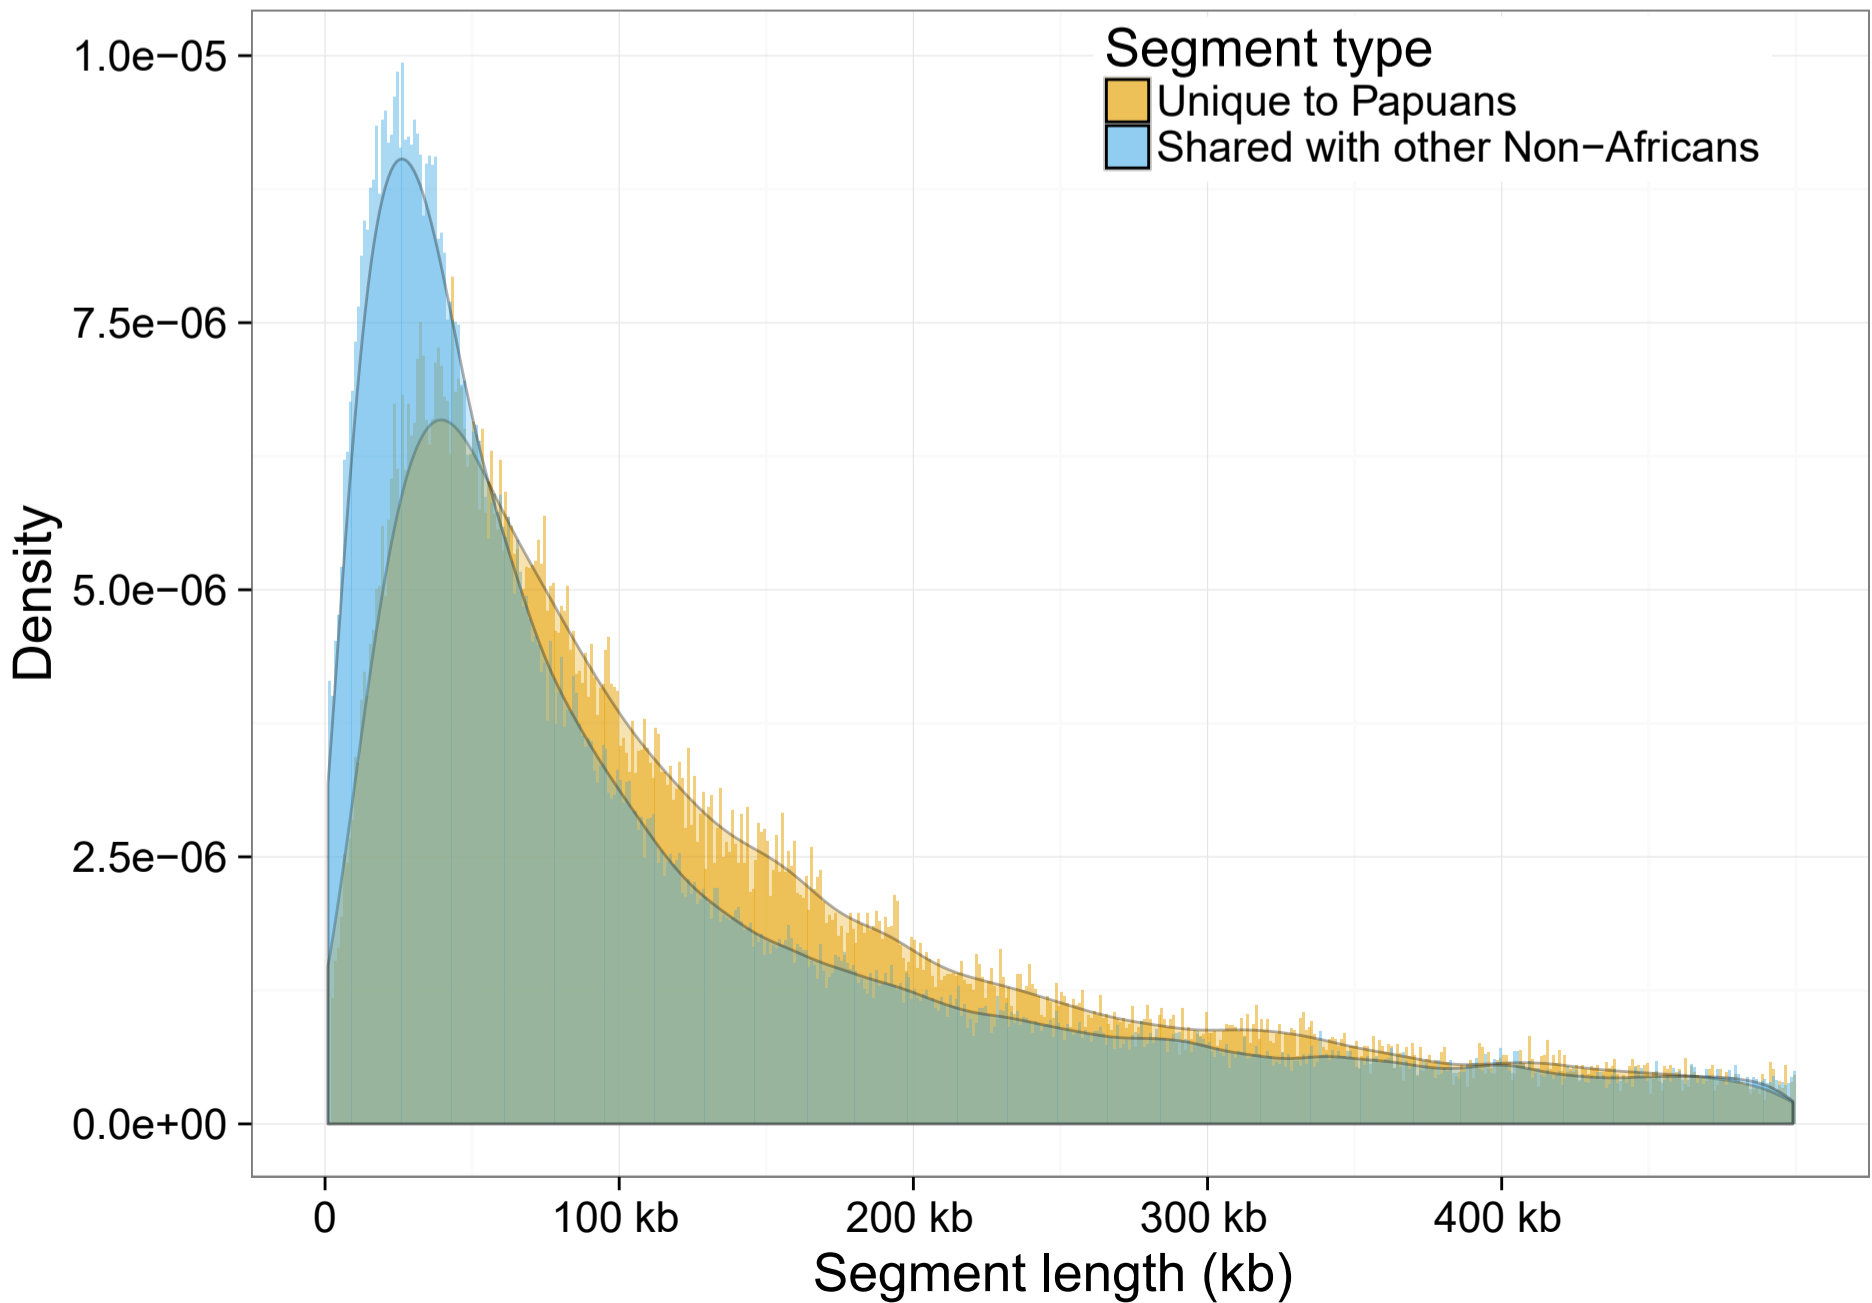

Source: https://www.biorxiv.org/content/10.1101/283606v2.full.pdf
