# Supplementary material for: Detecting archaic introgression without archaic reference genomes
Source: bioRxiv or medRxiv preprint supplement (doi:10.1101/283606), 2018-03-23

# Archaic segments for chromosome 1

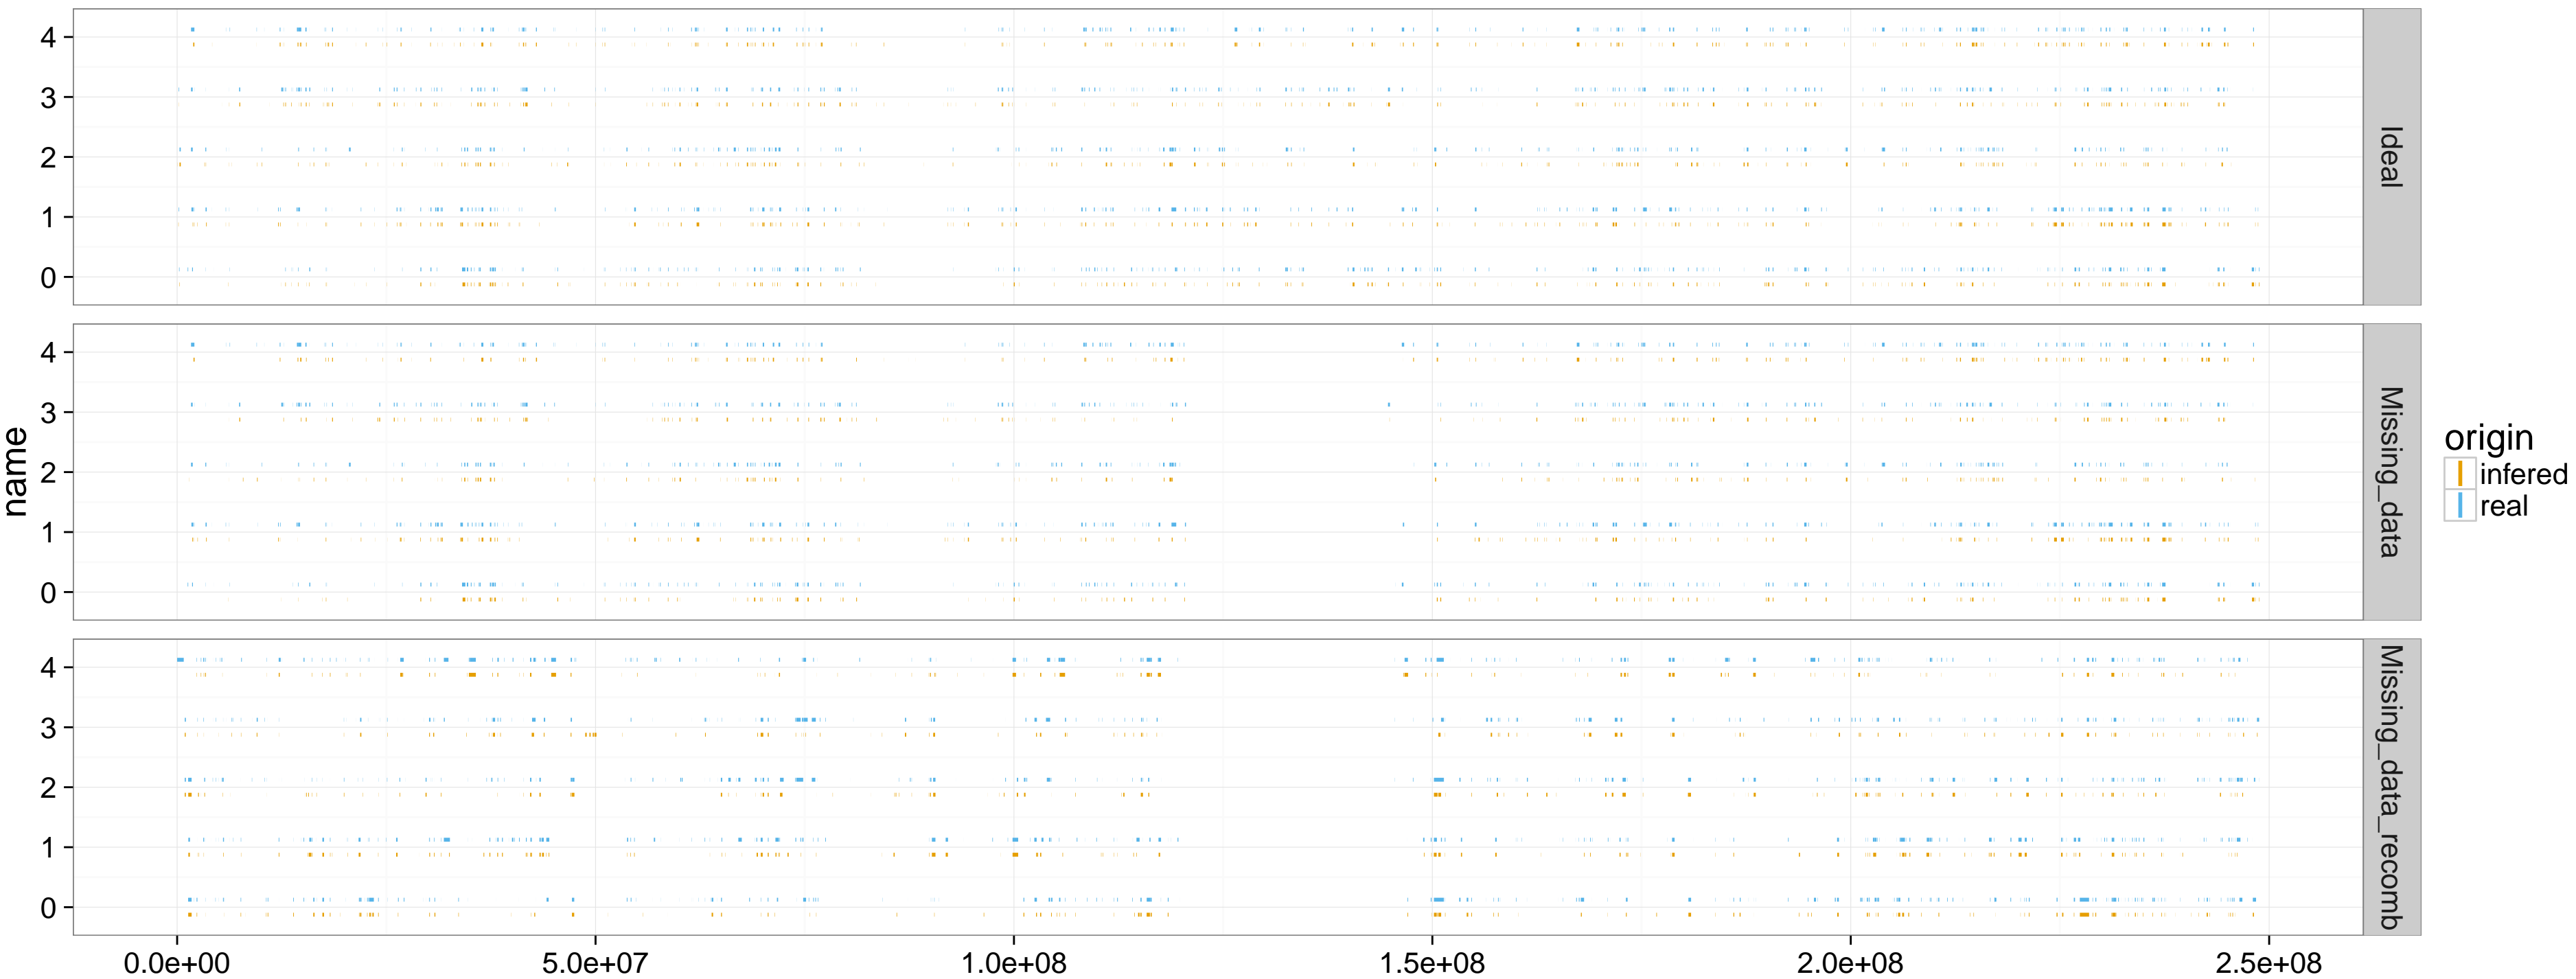

# Archaic segments for chromosome 2

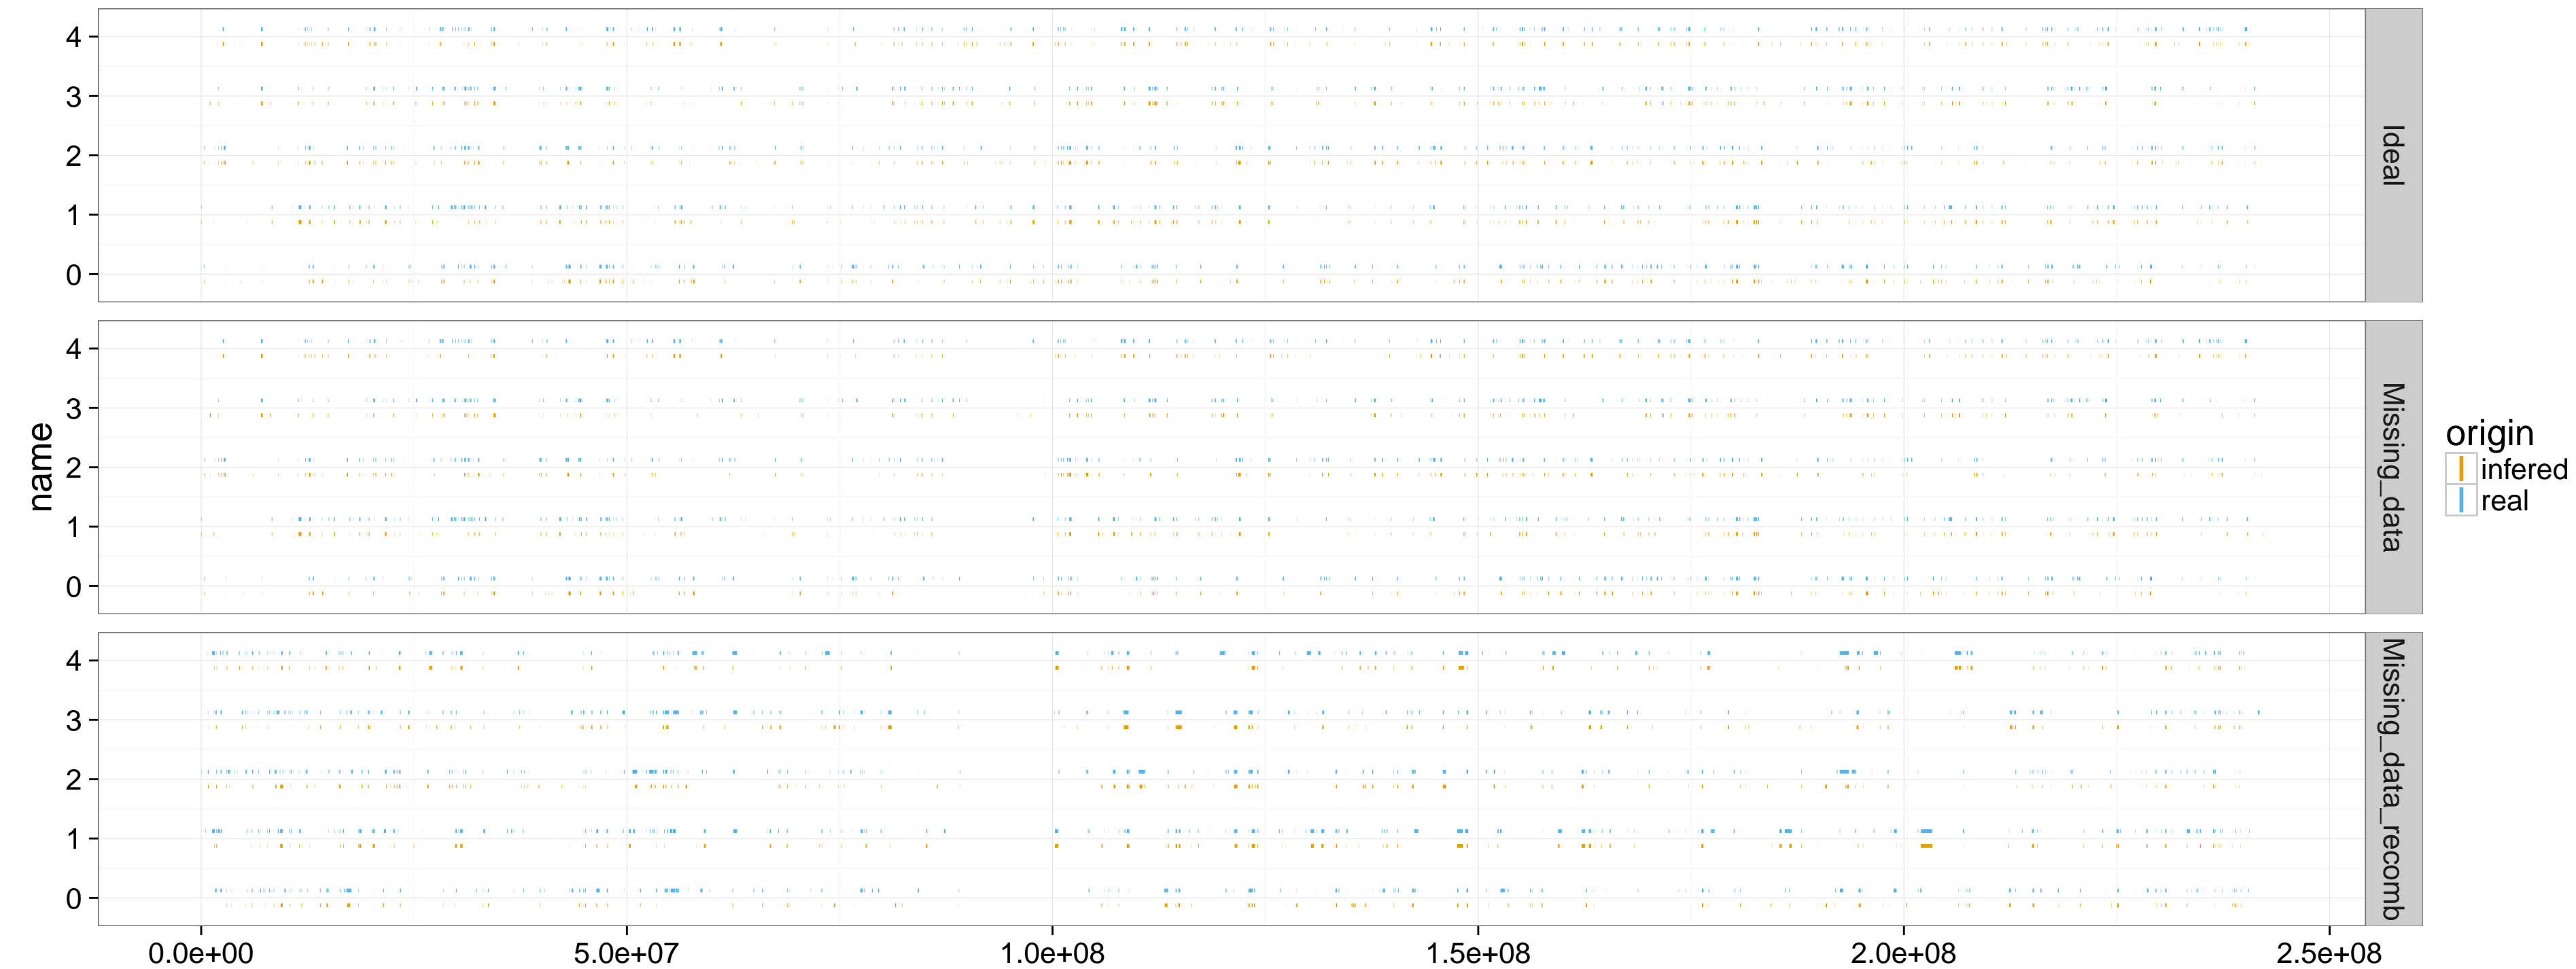

# Archaic segments for chromosome 3

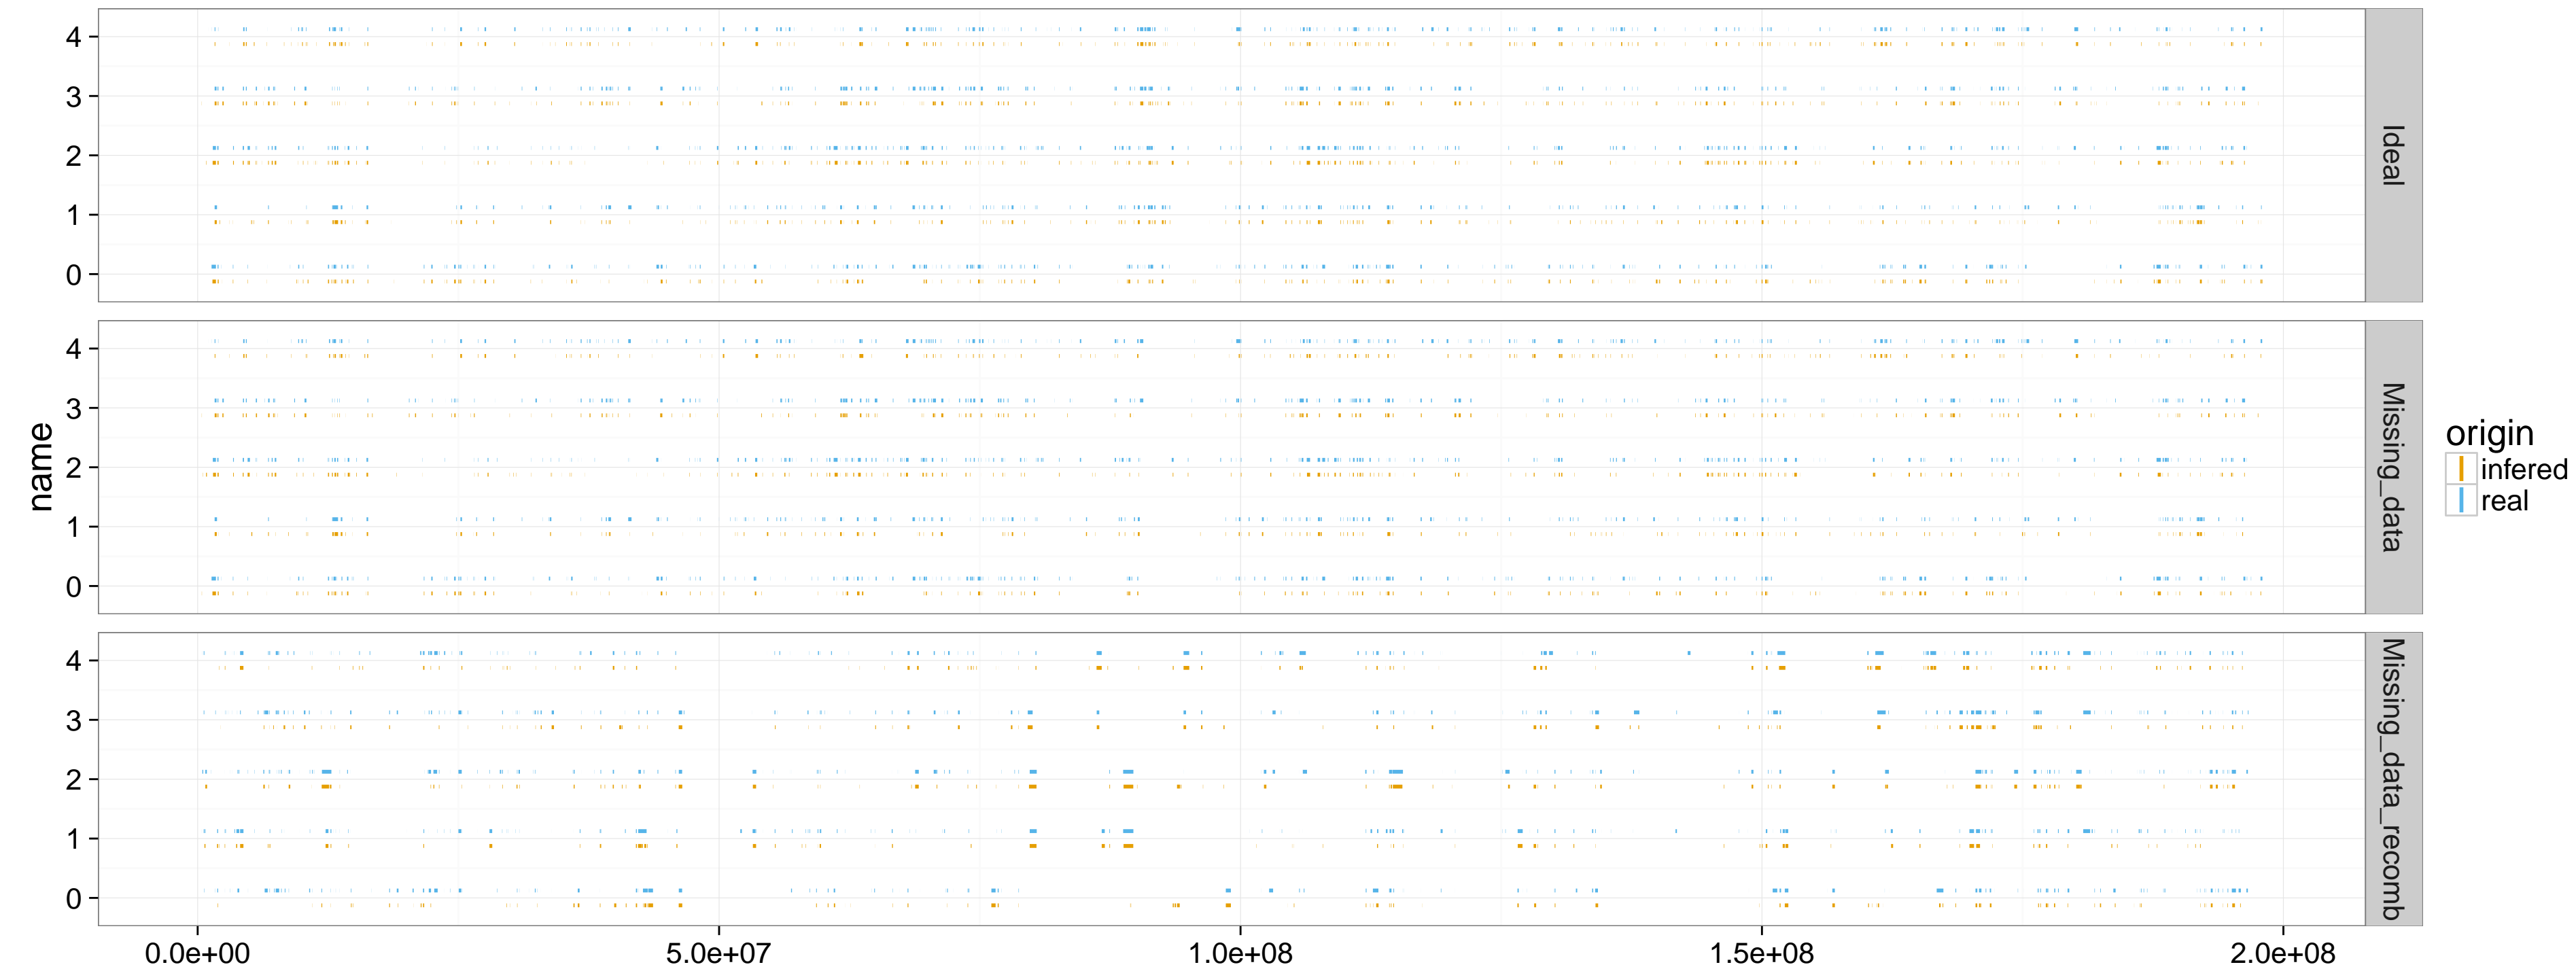

# Archaic segments for chromosome 4

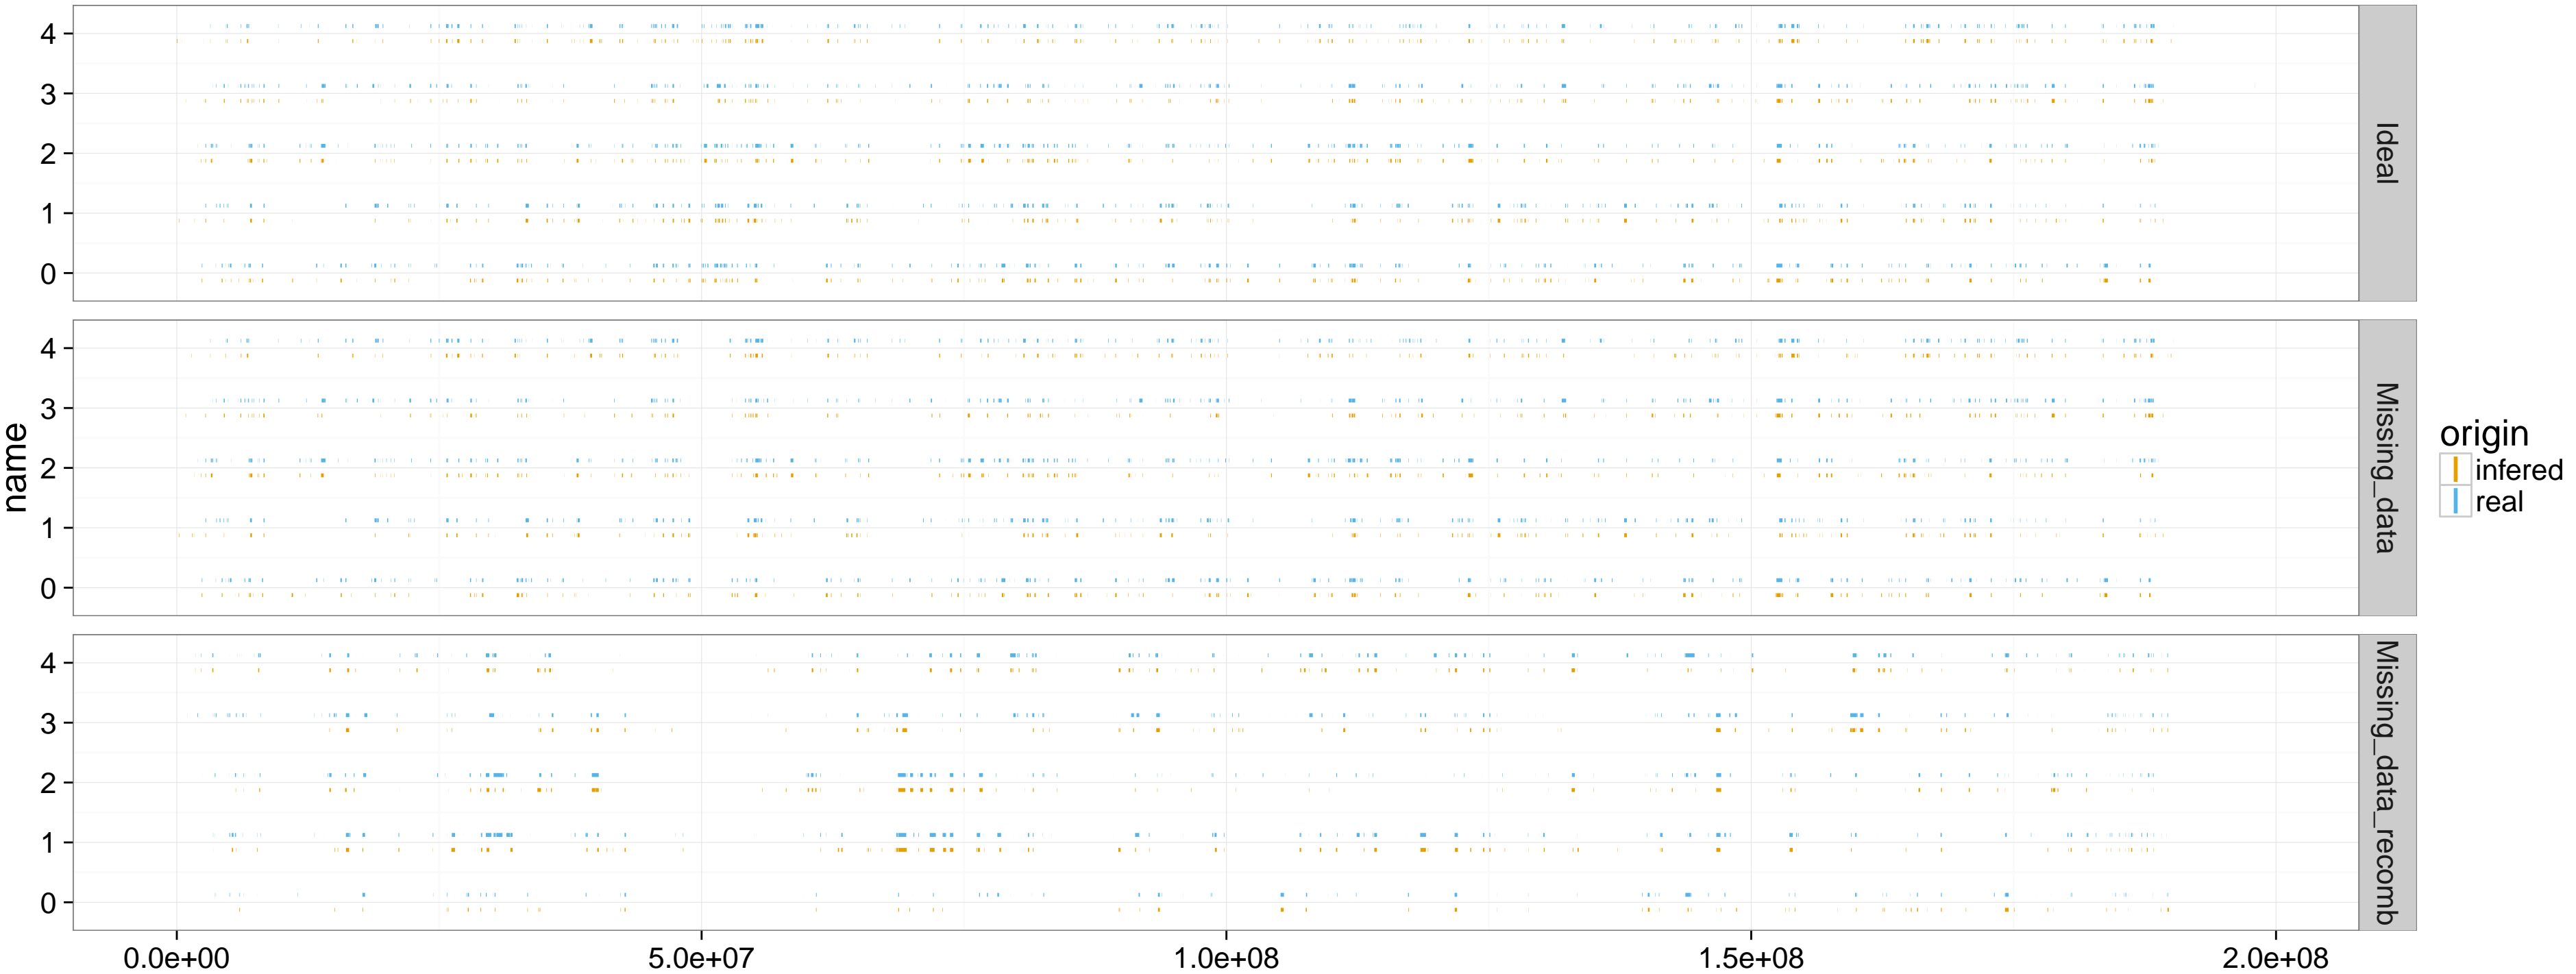

# Archaic segments for chromosome 5

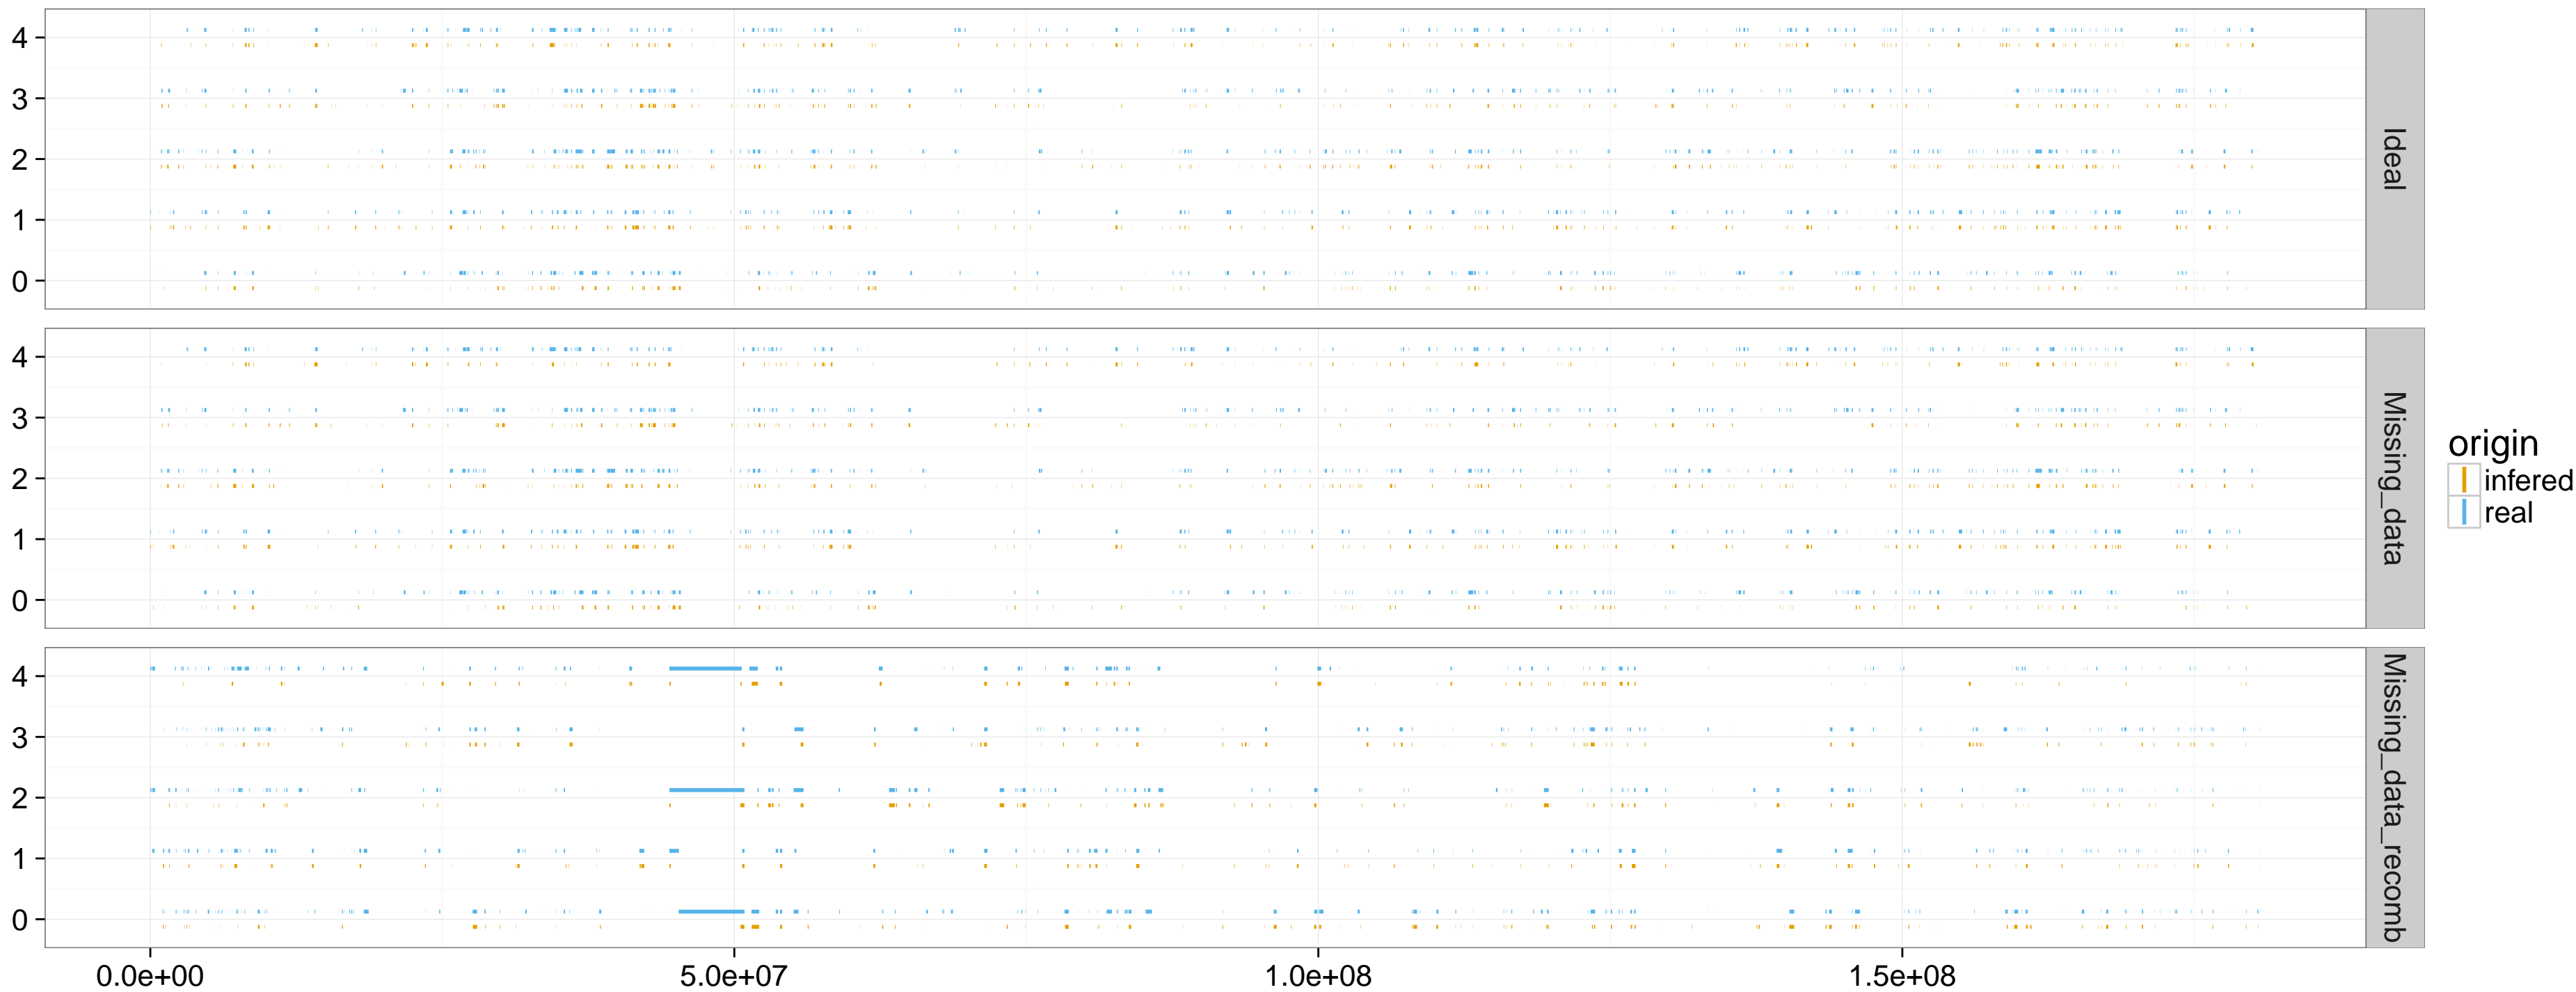

# Archaic segments for chromosome 6

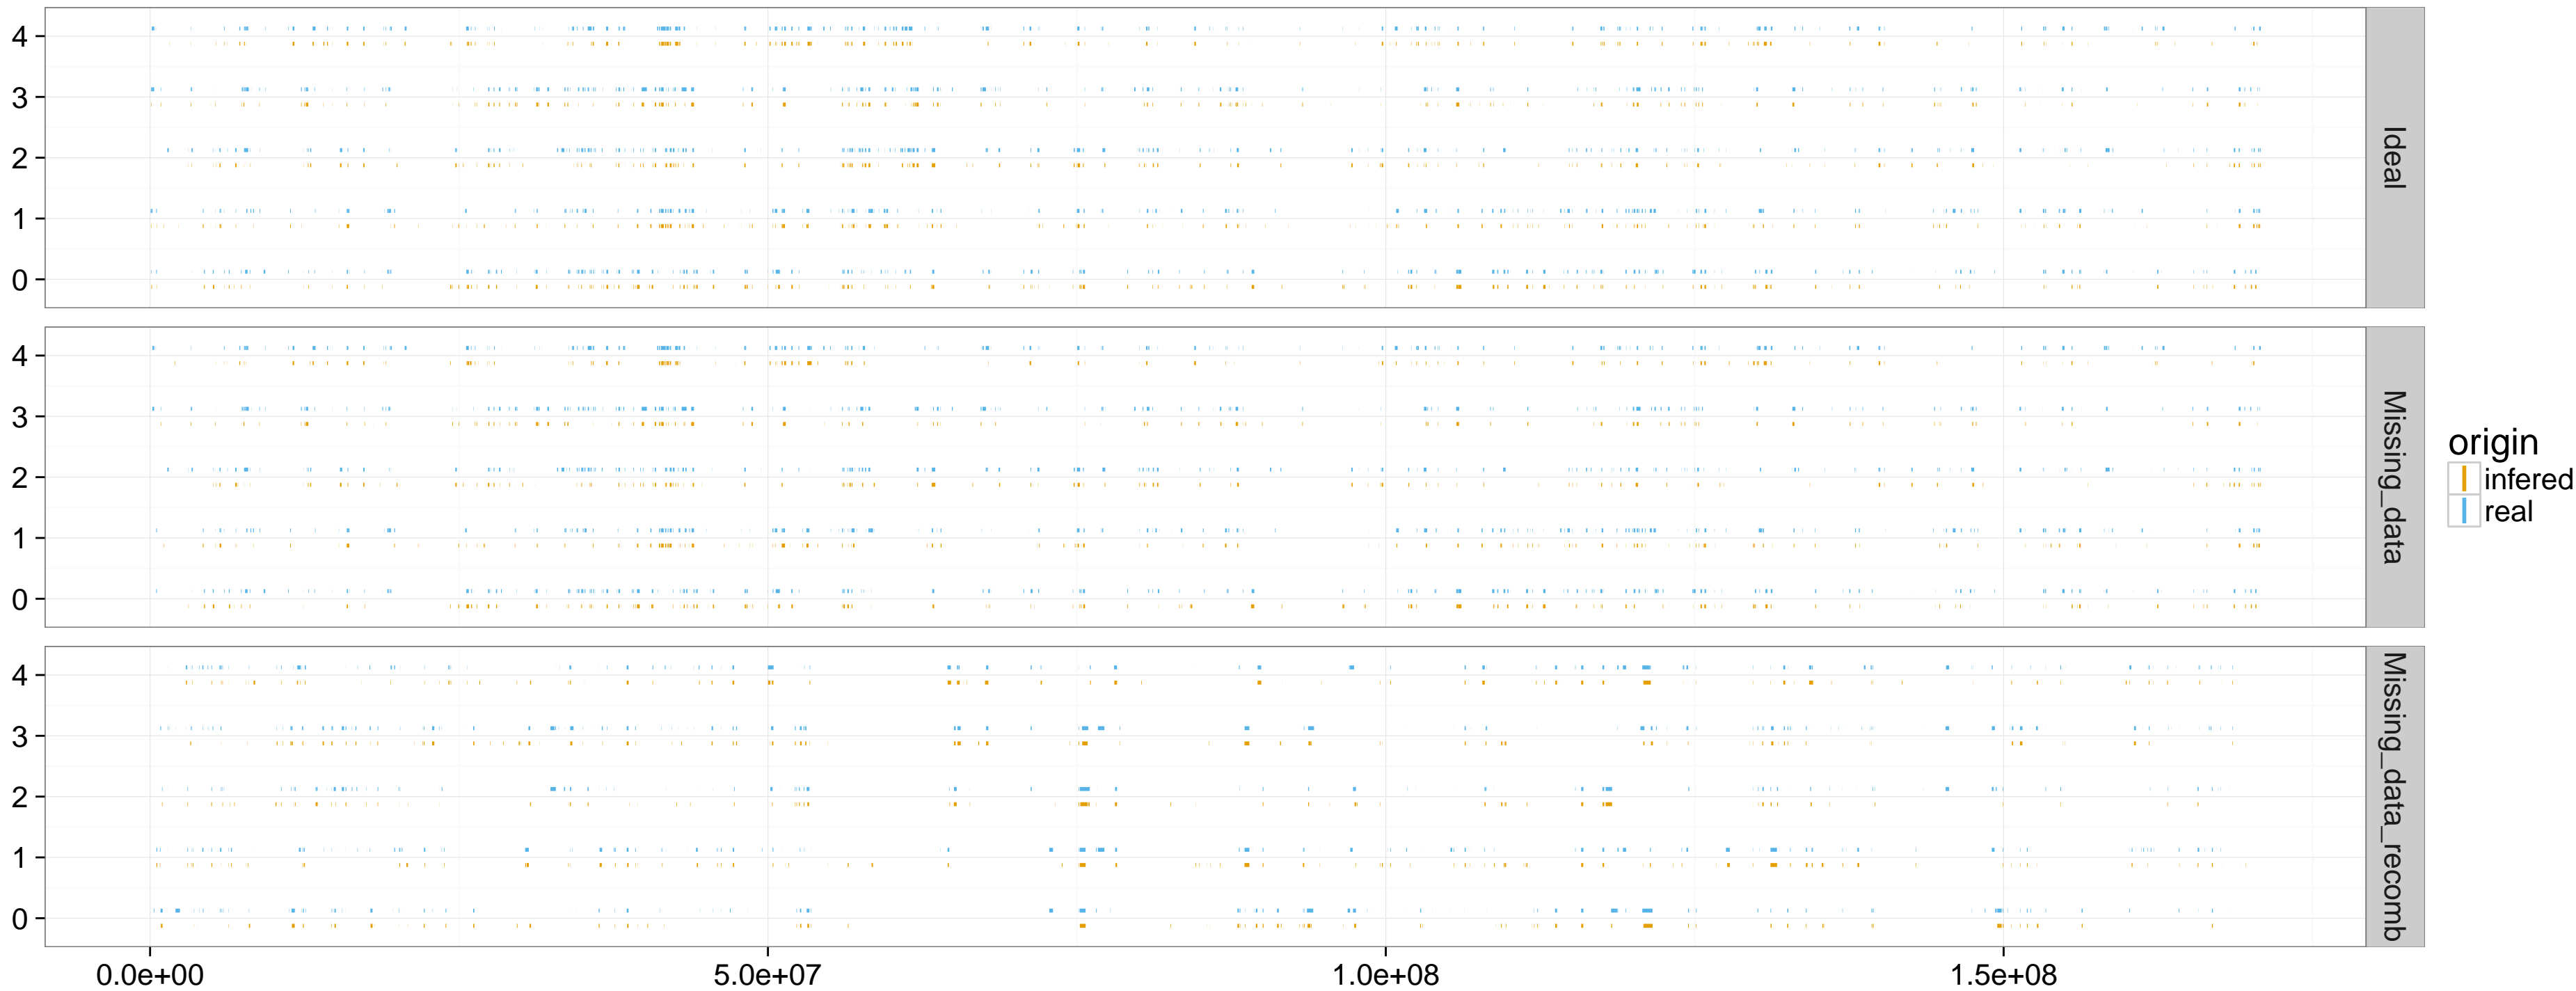

# Archaic segments for chromosome 7

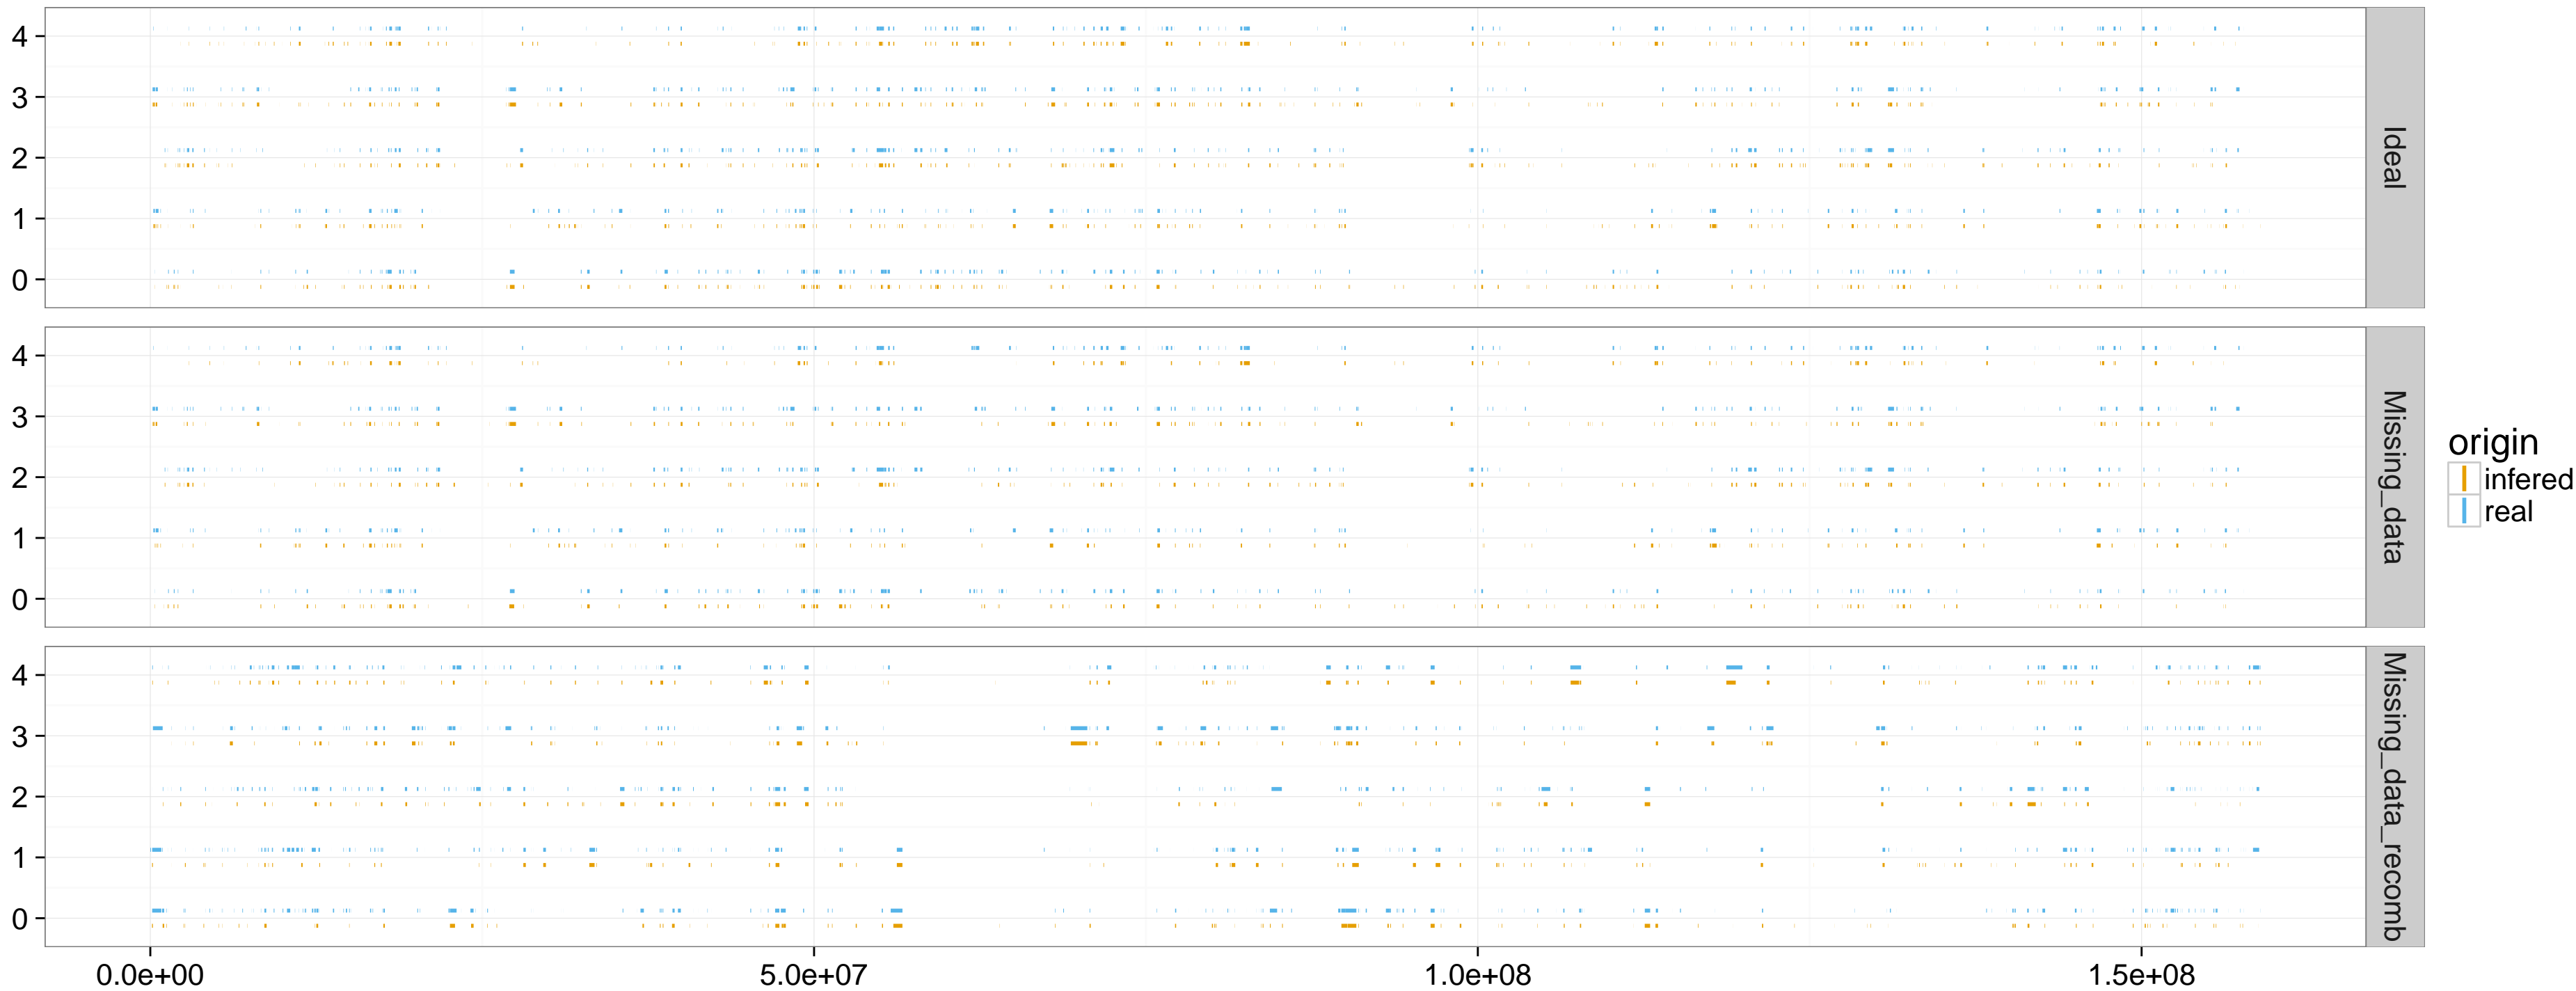

# Archaic segments for chromosome 8

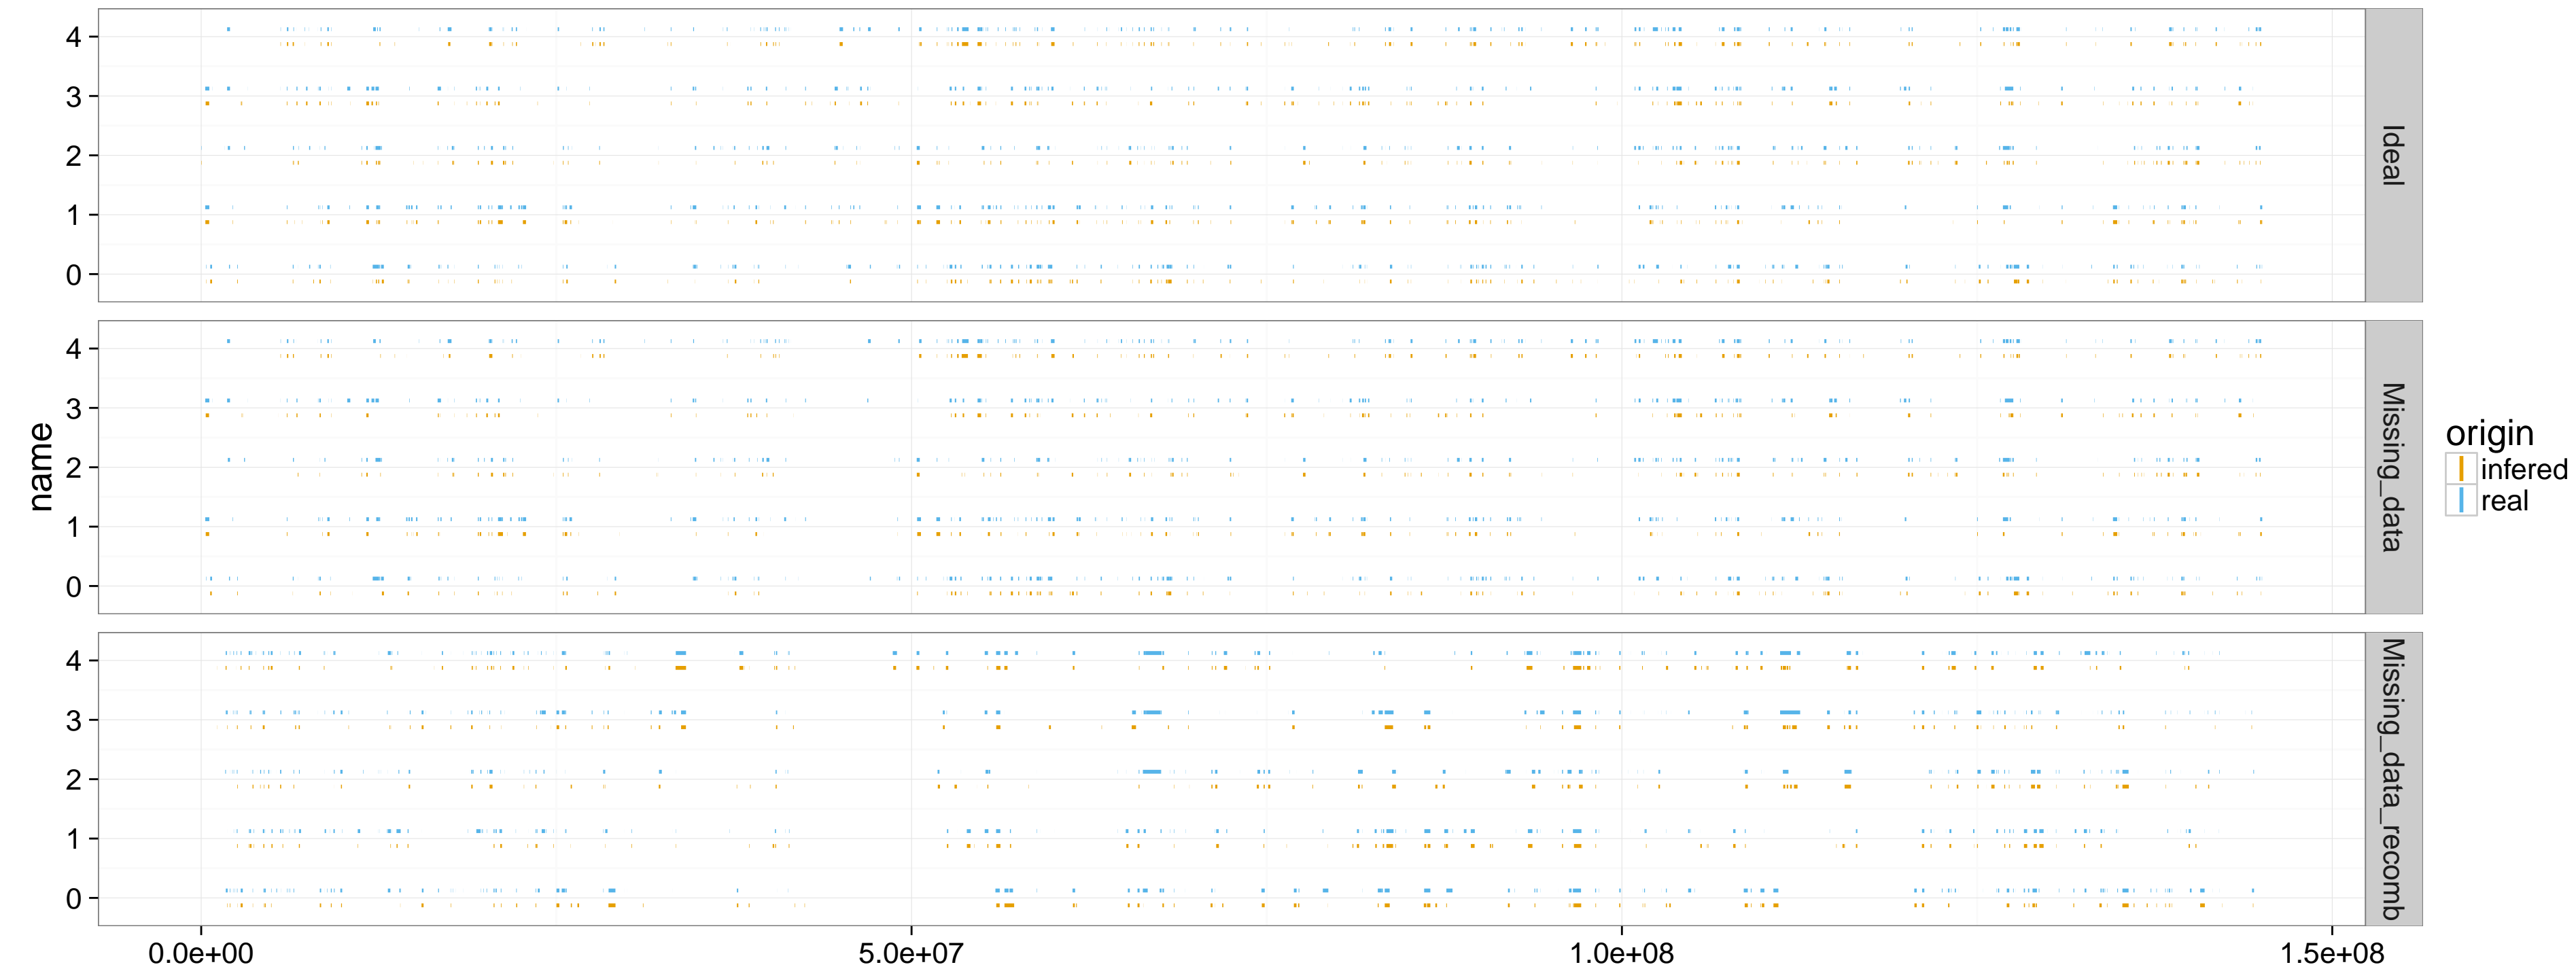



# Archaic segments for chromosome 9

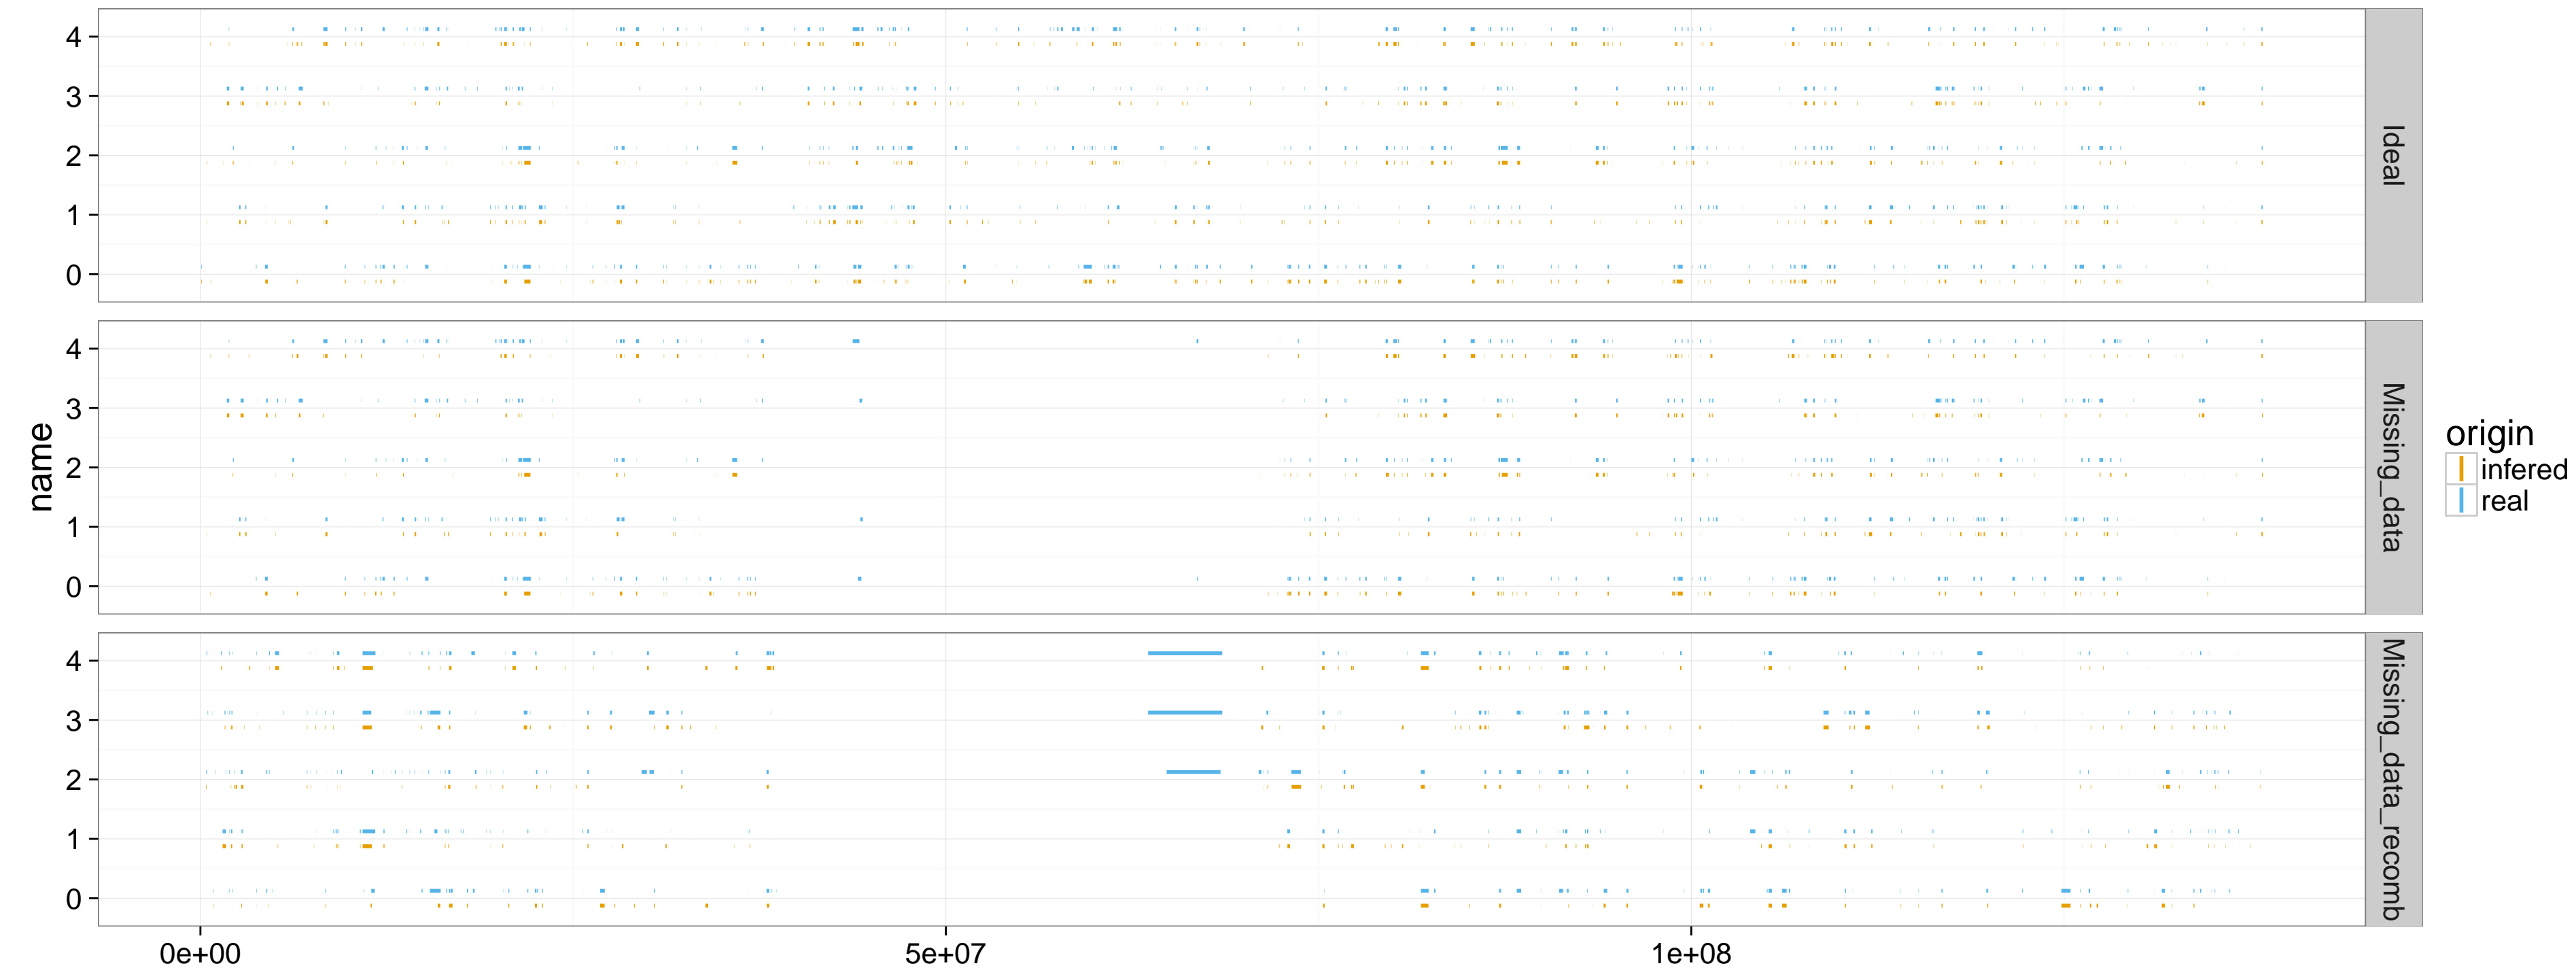

# Archaic segments for chromosome 10

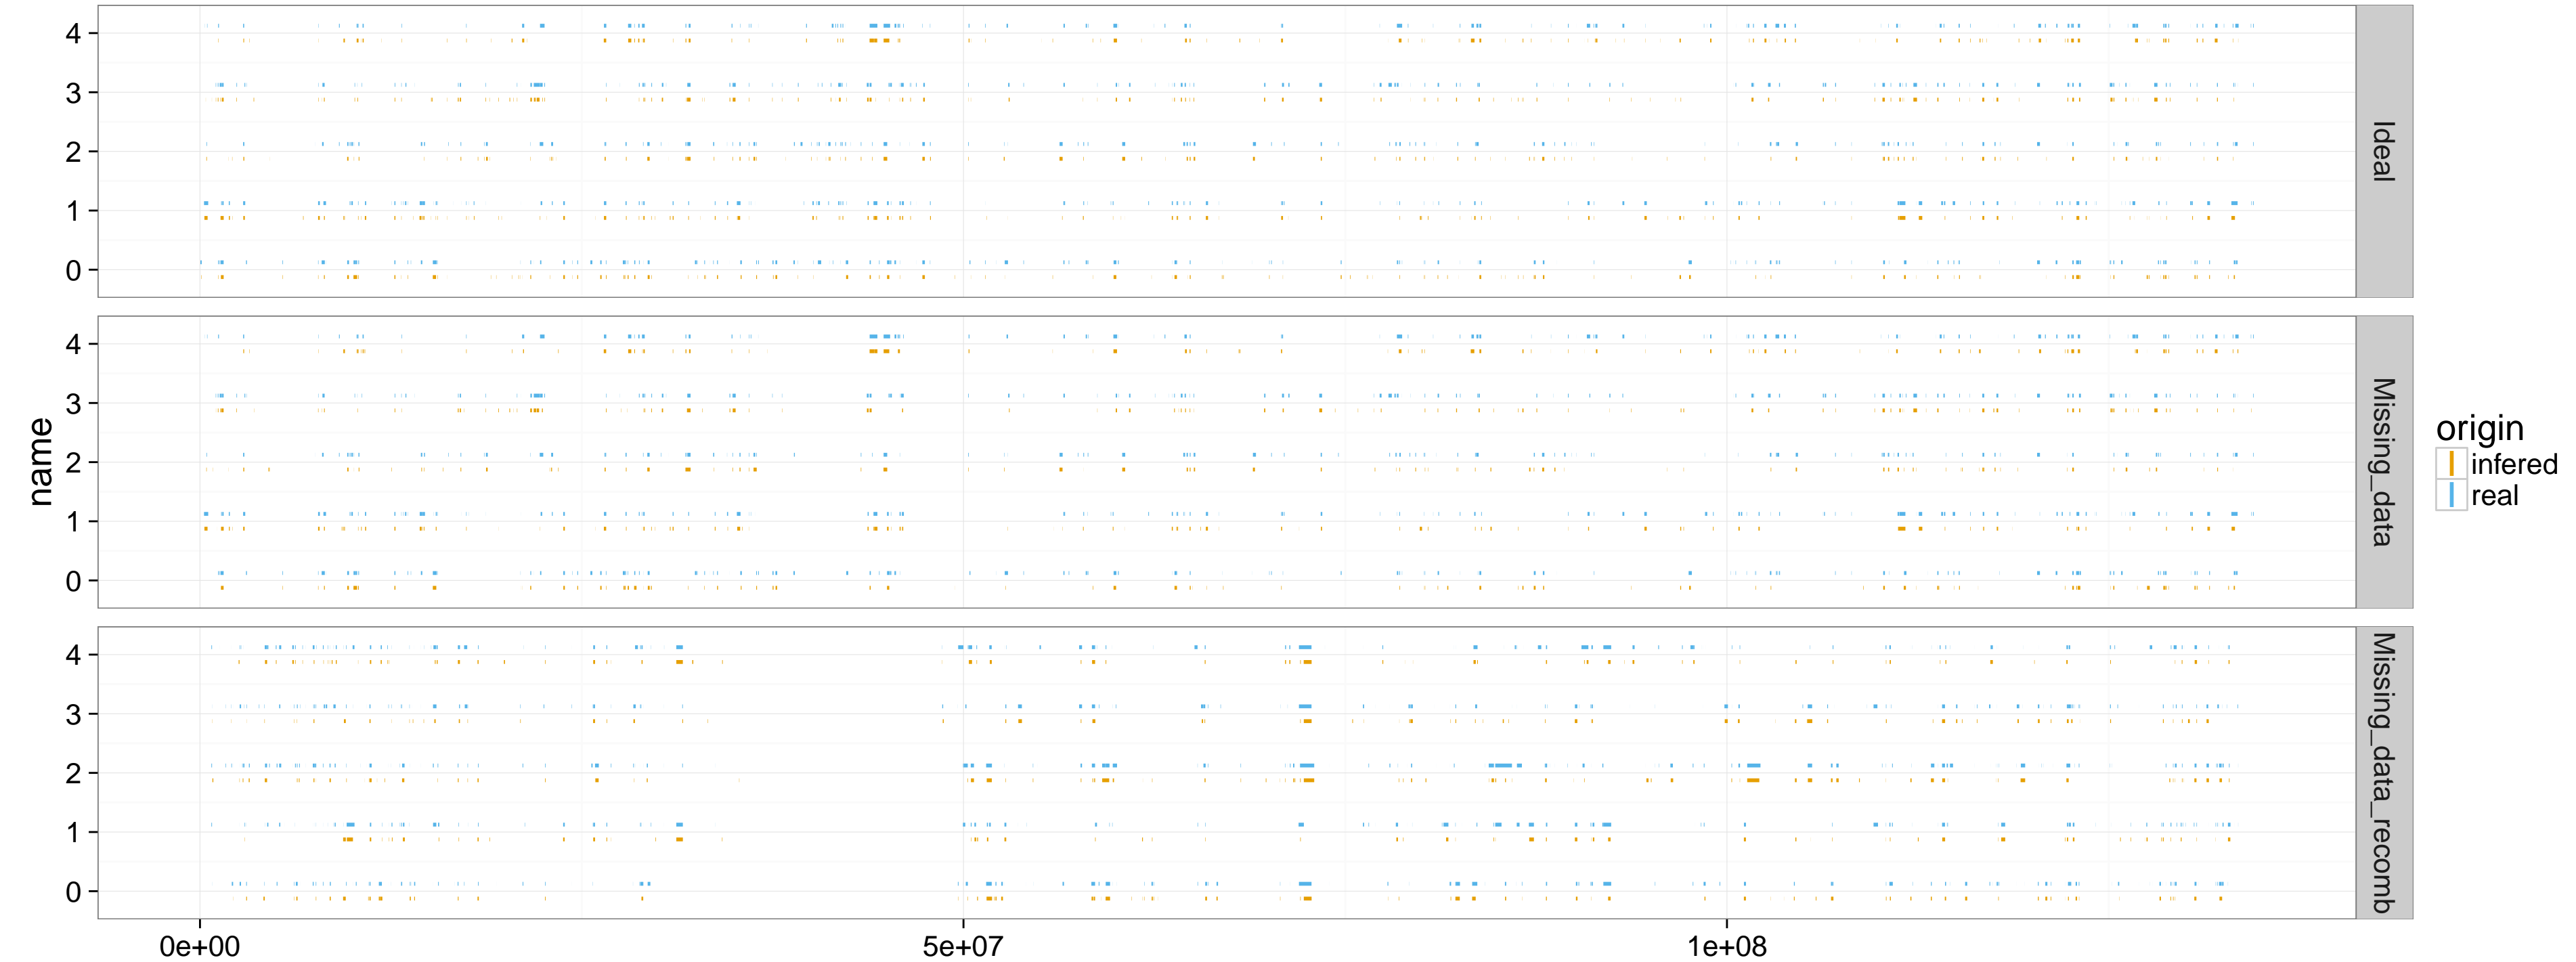

# Archaic segments for chromosome 11

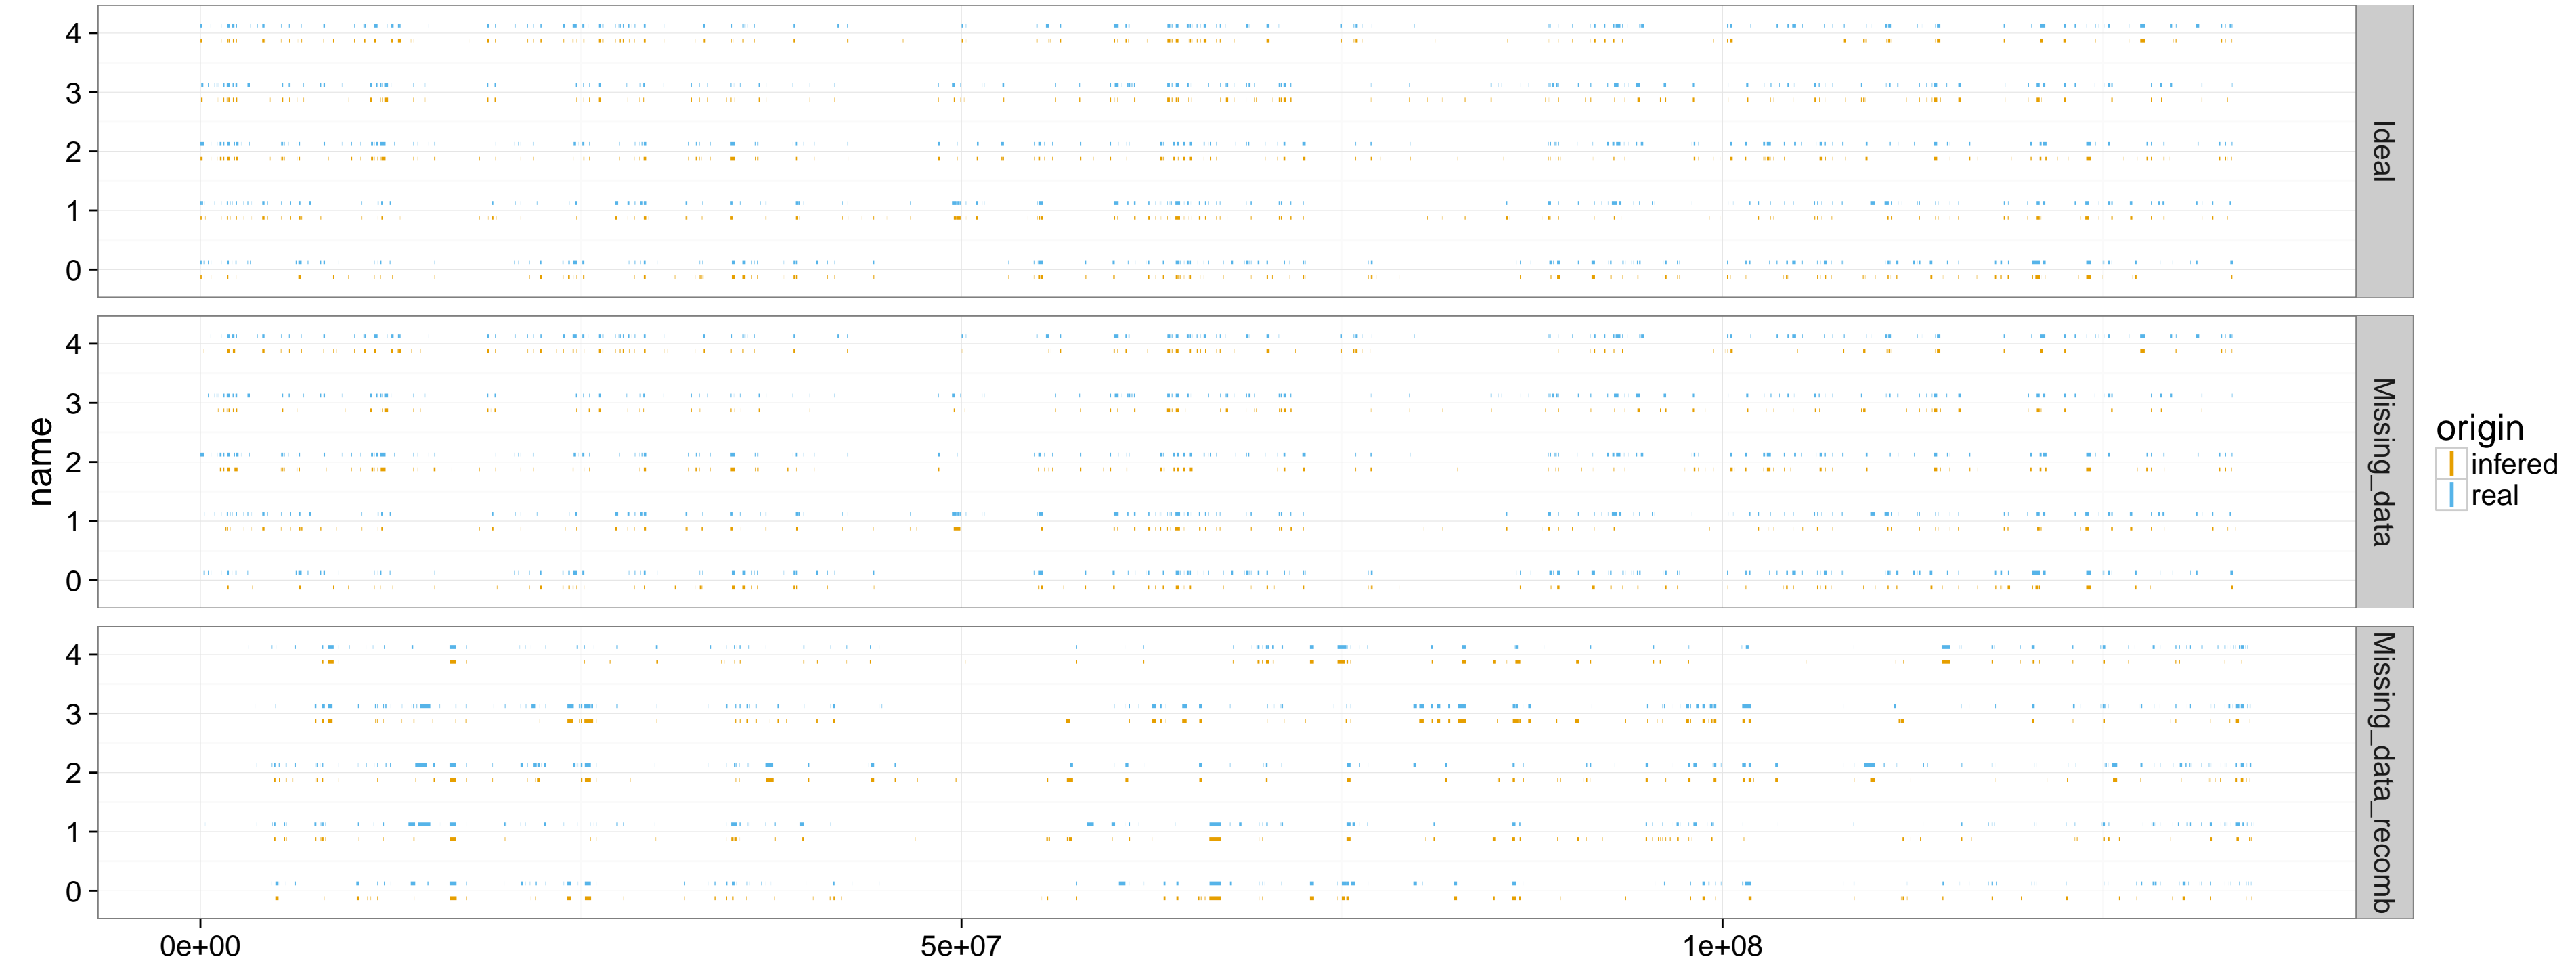

# Archaic segments for chromosome 12

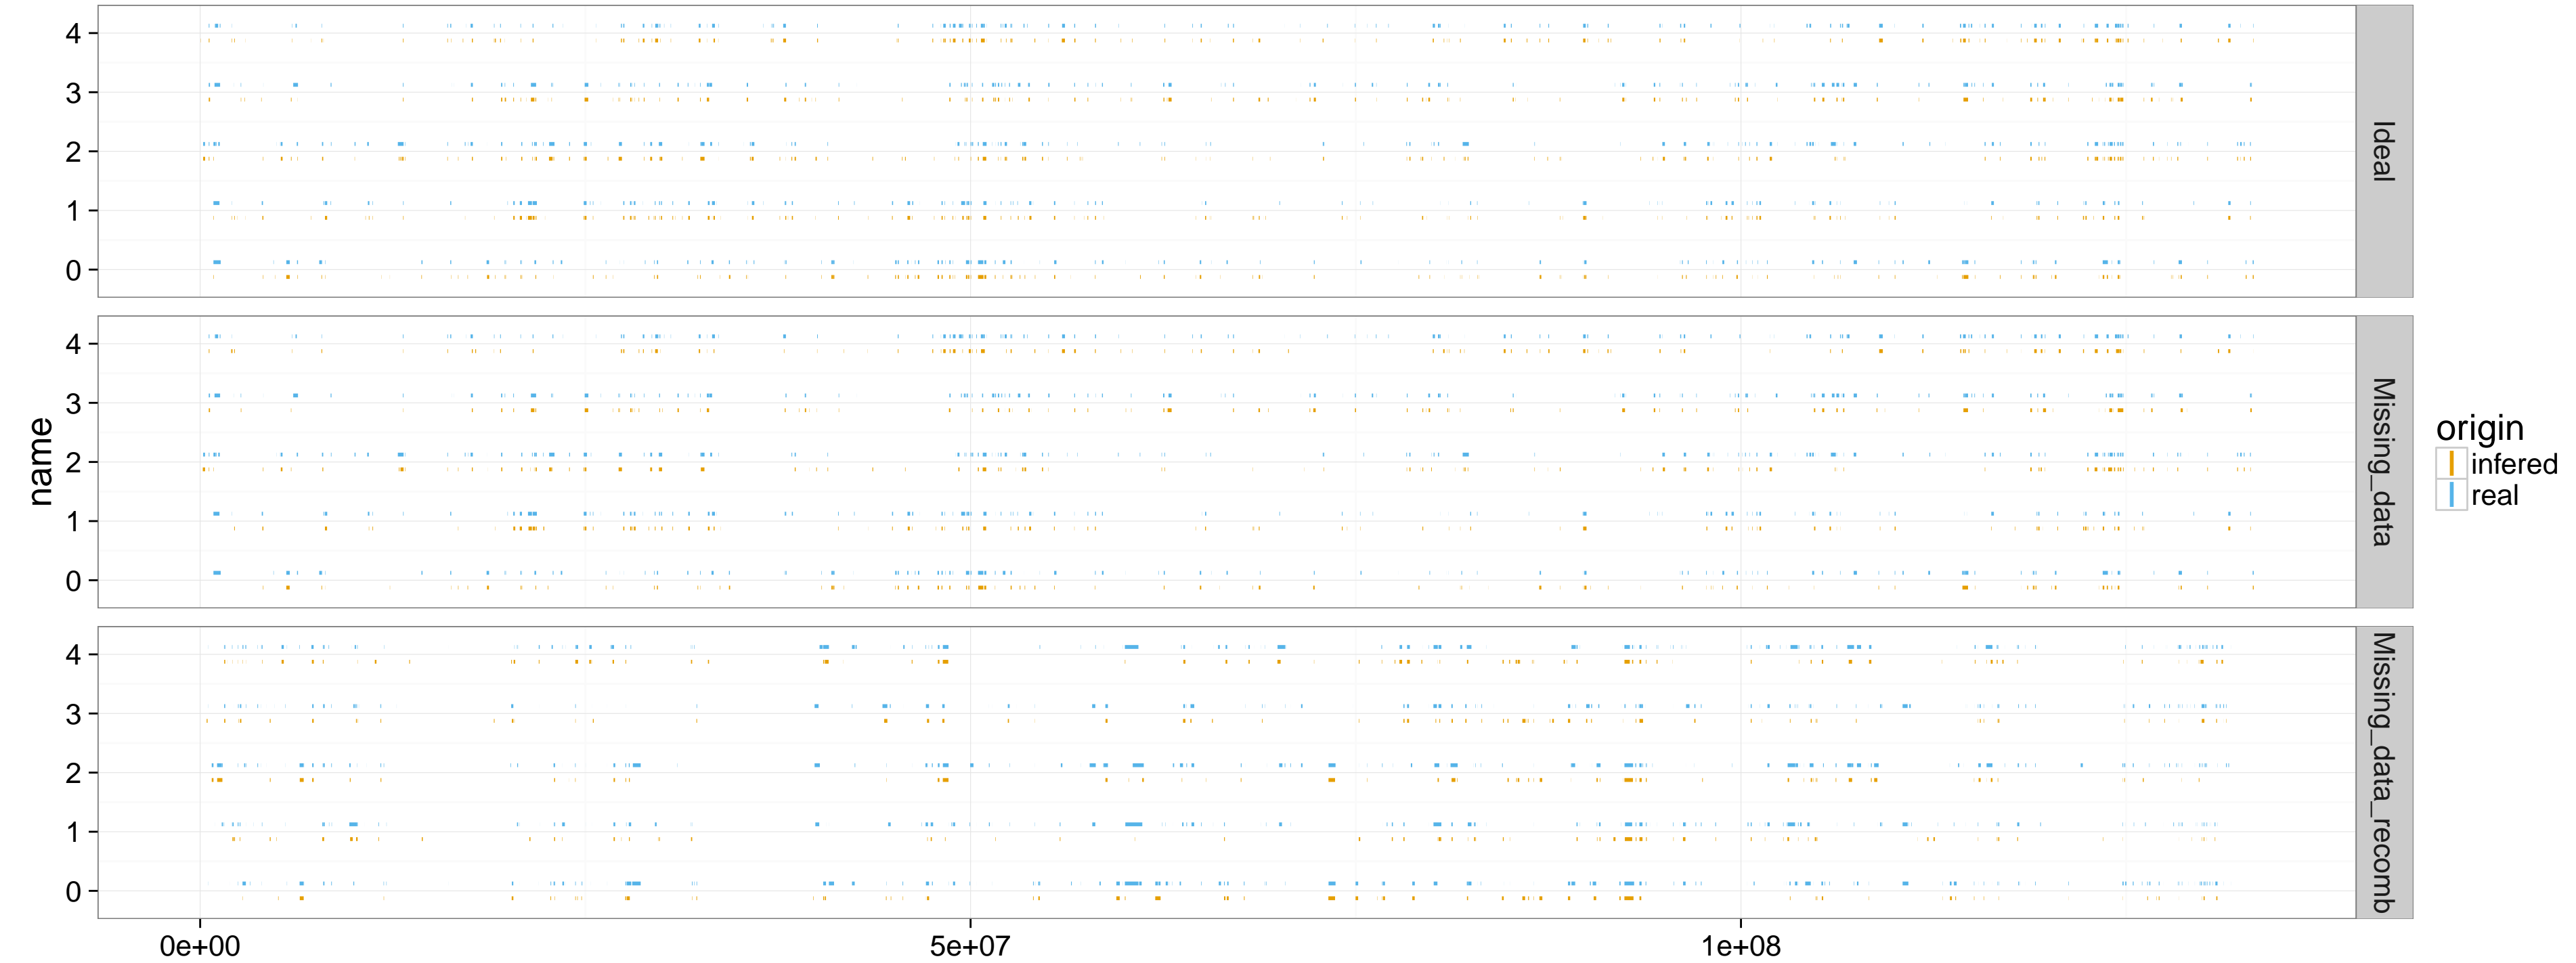

# Archaic segments for chromosome 13

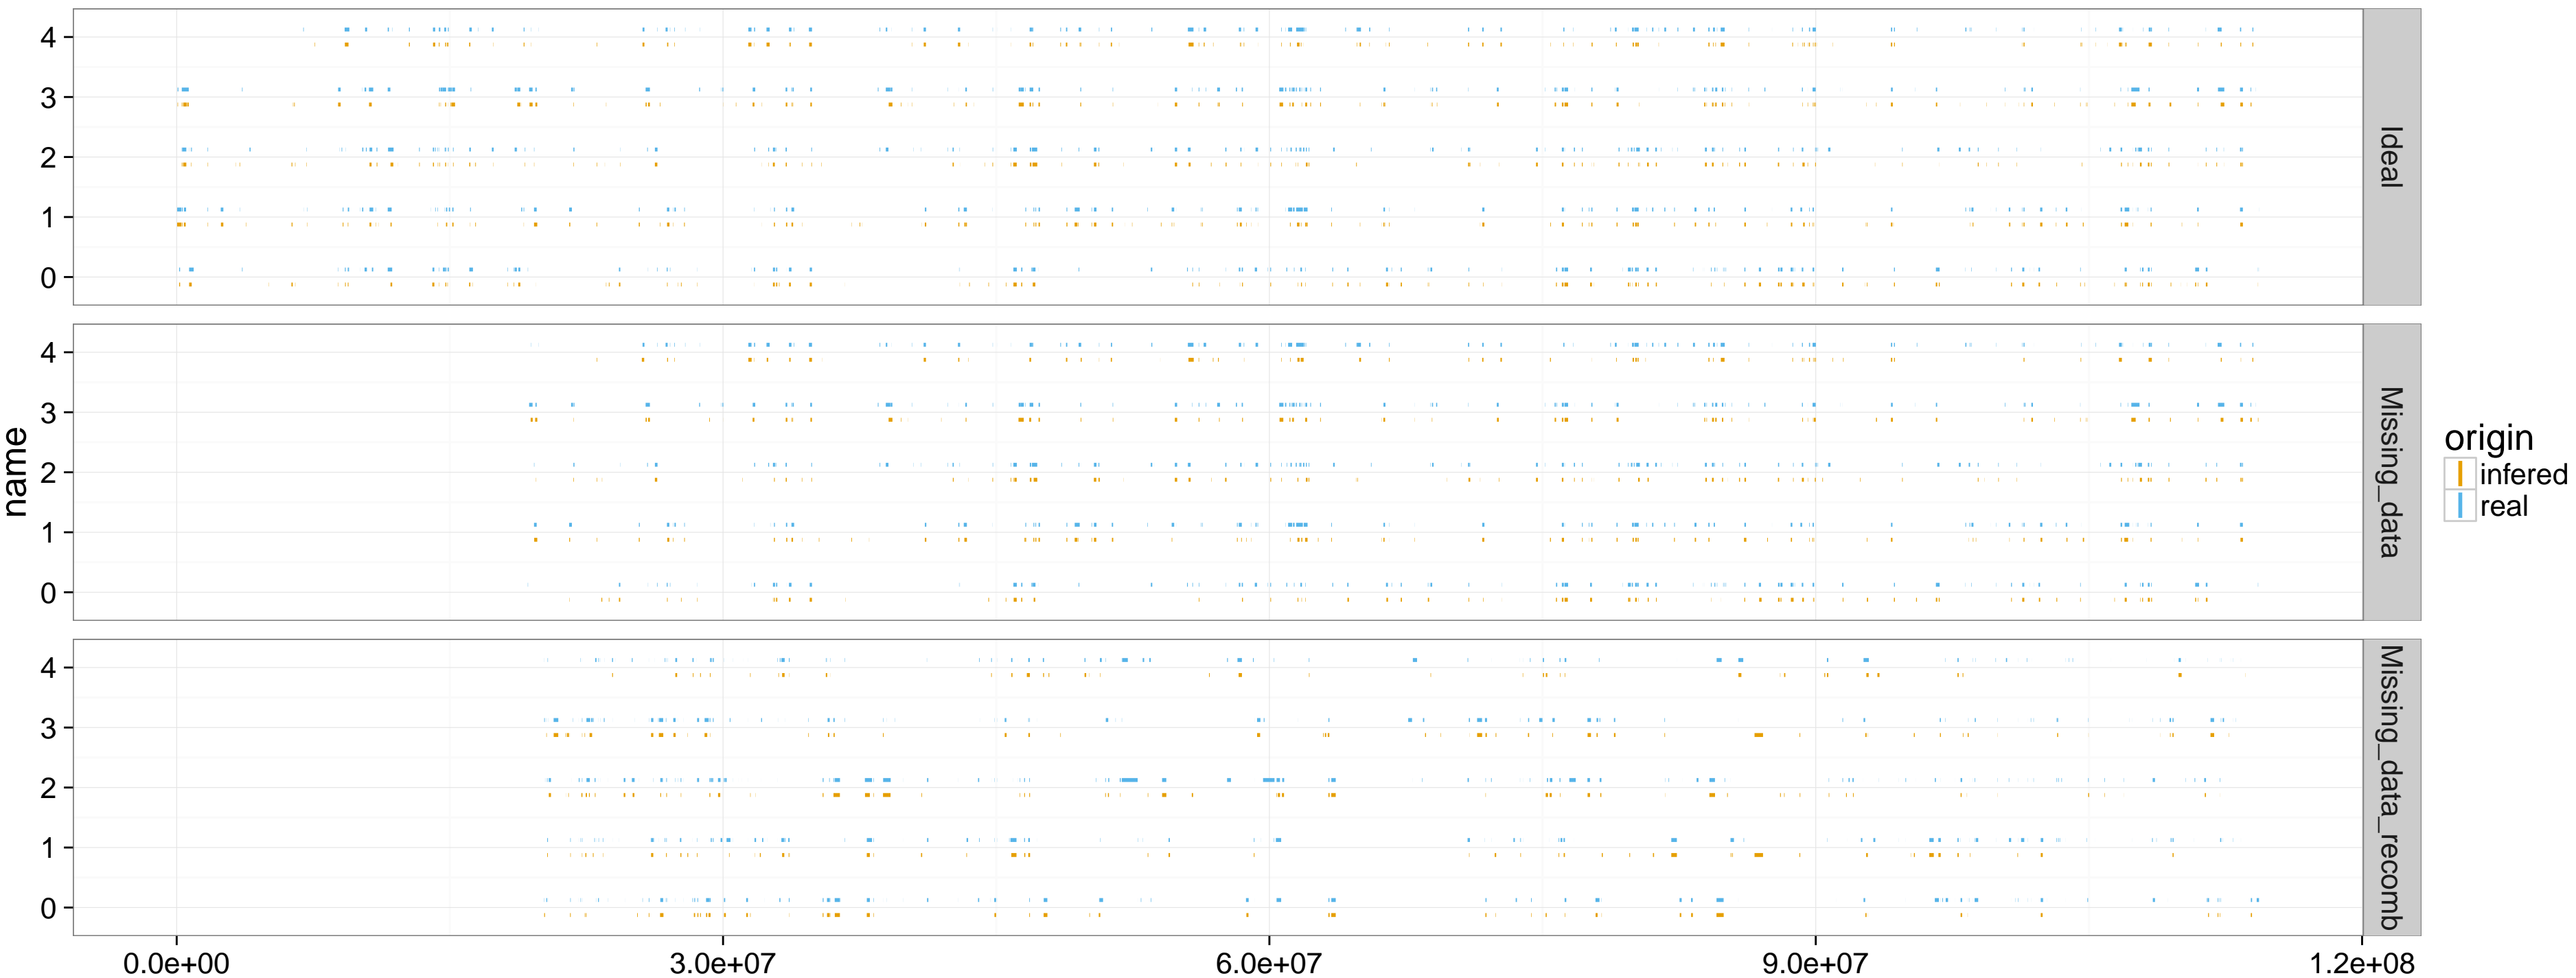

# Archaic segments for chromosome 14

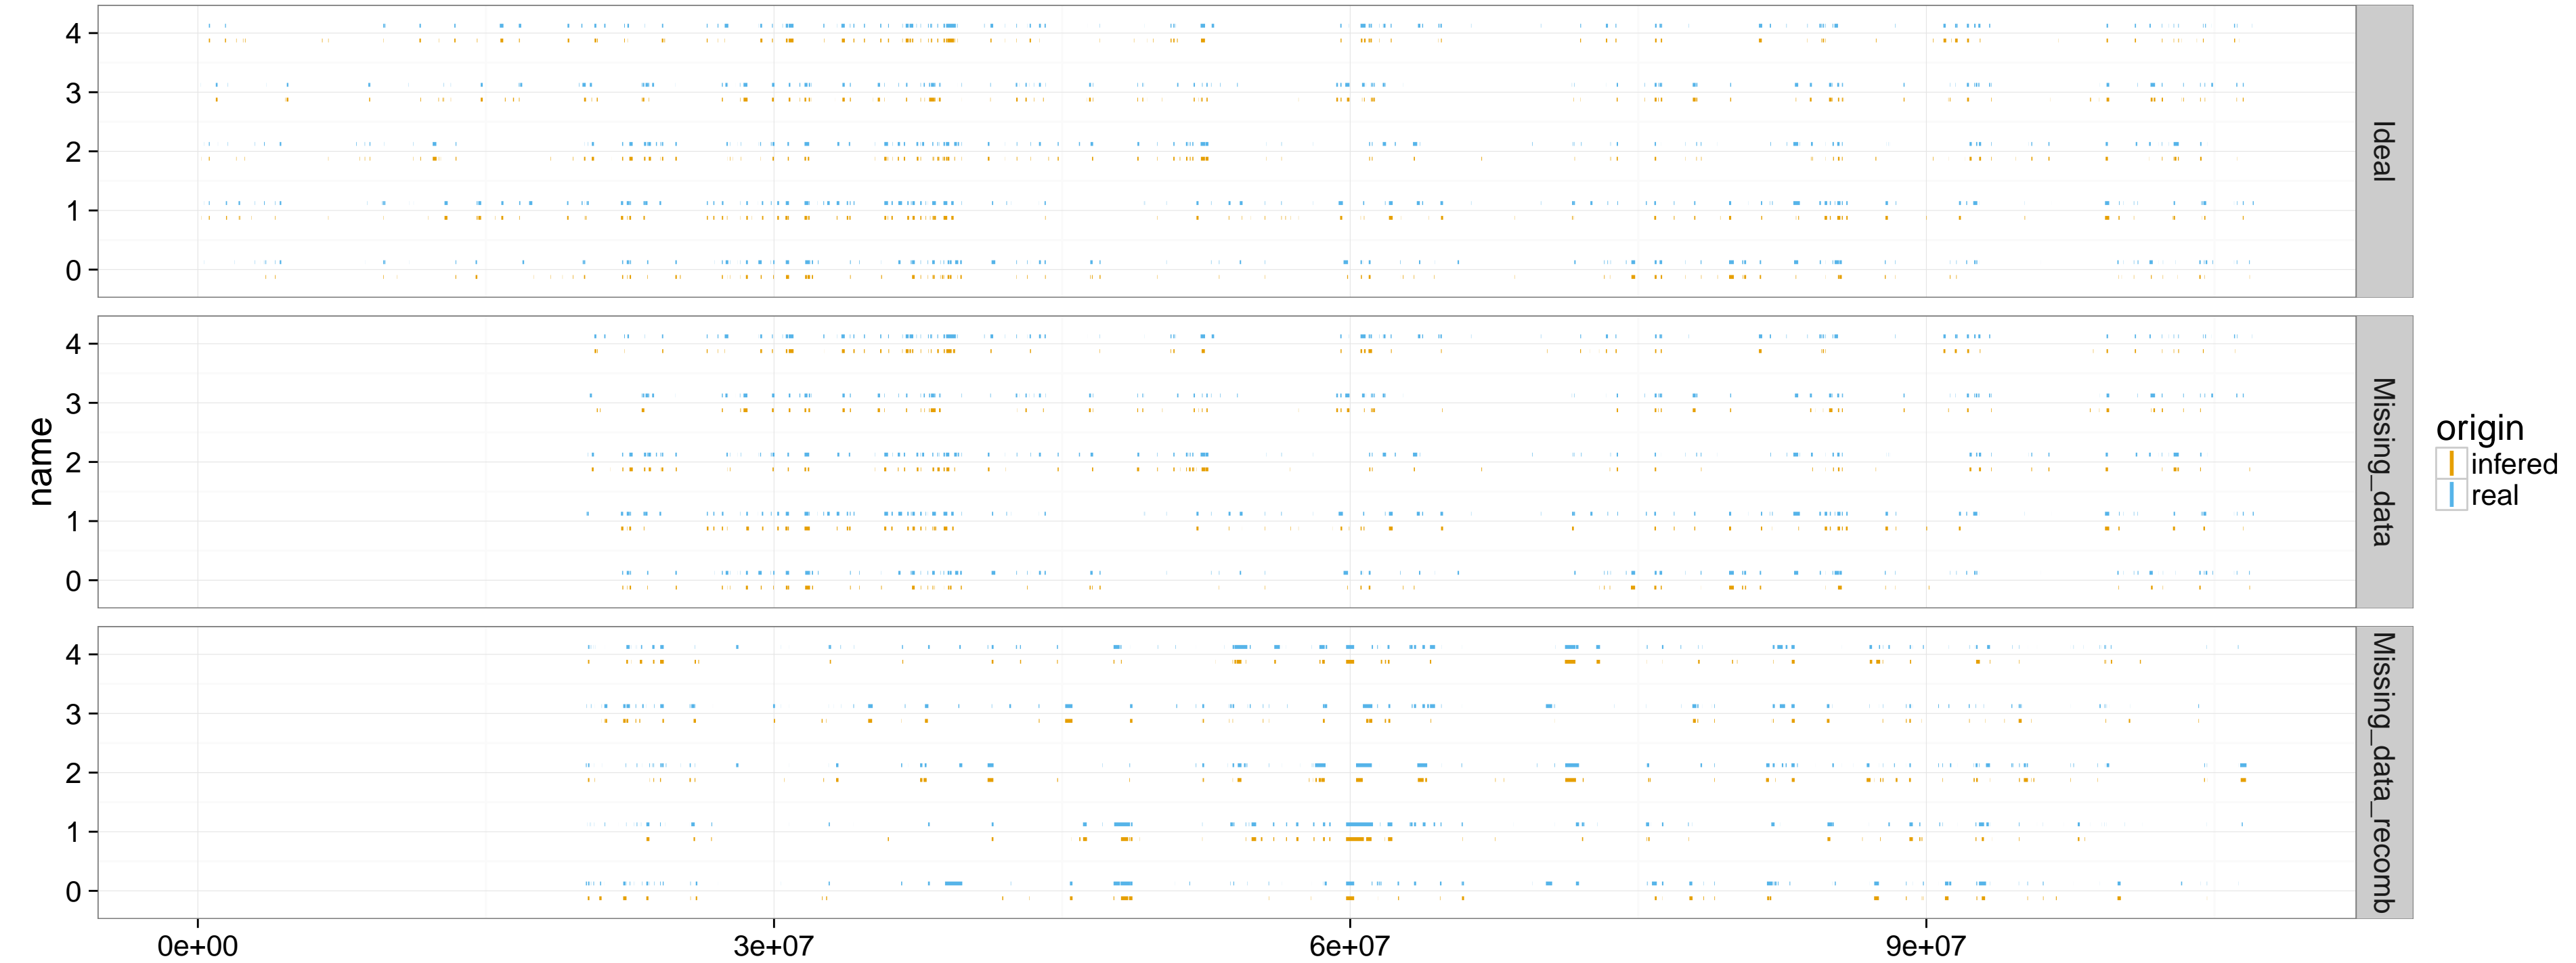

# Archaic segments for chromosome 15

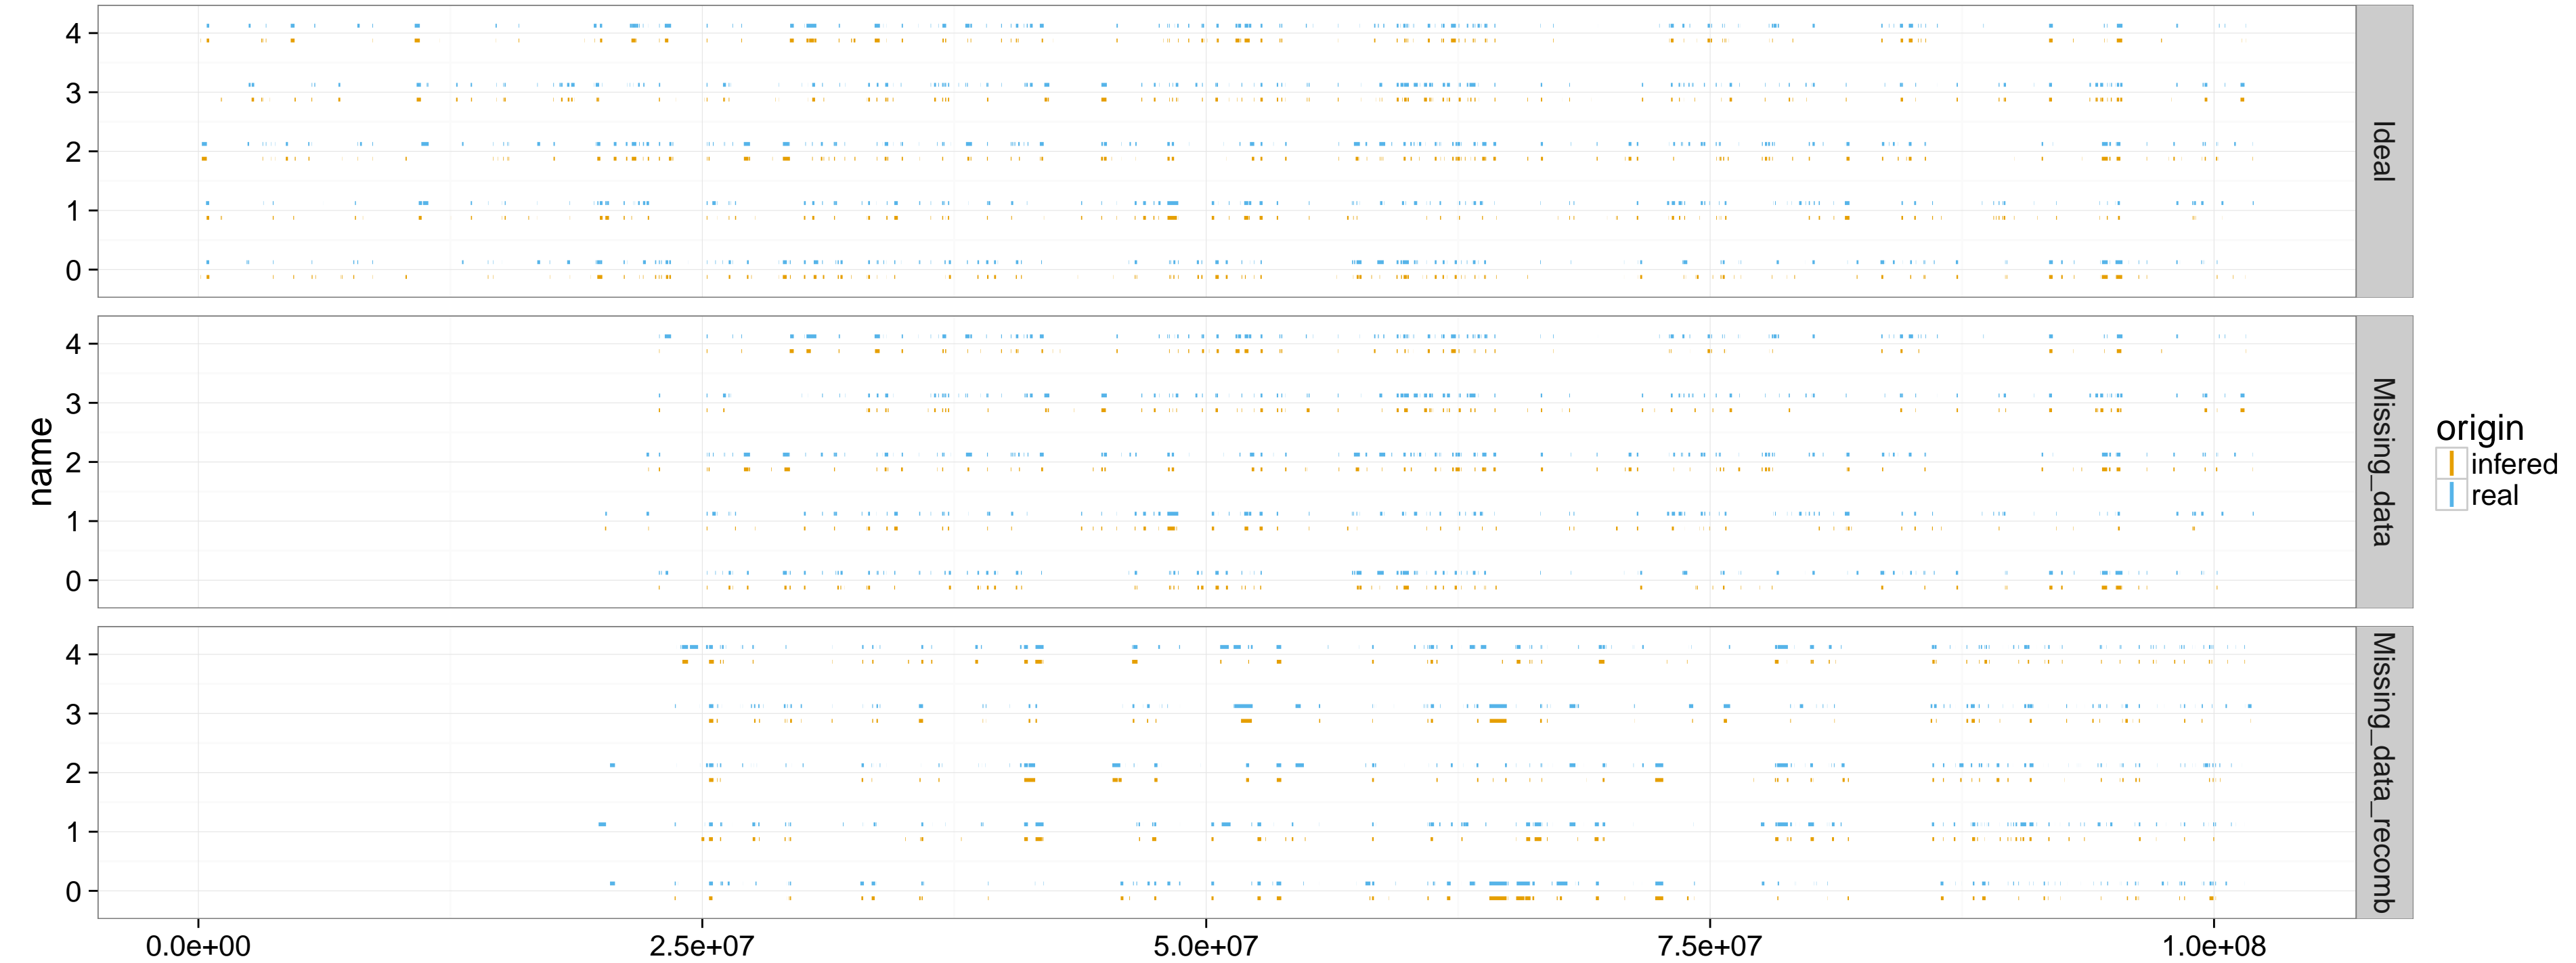

# Archaic segments for chromosome 16

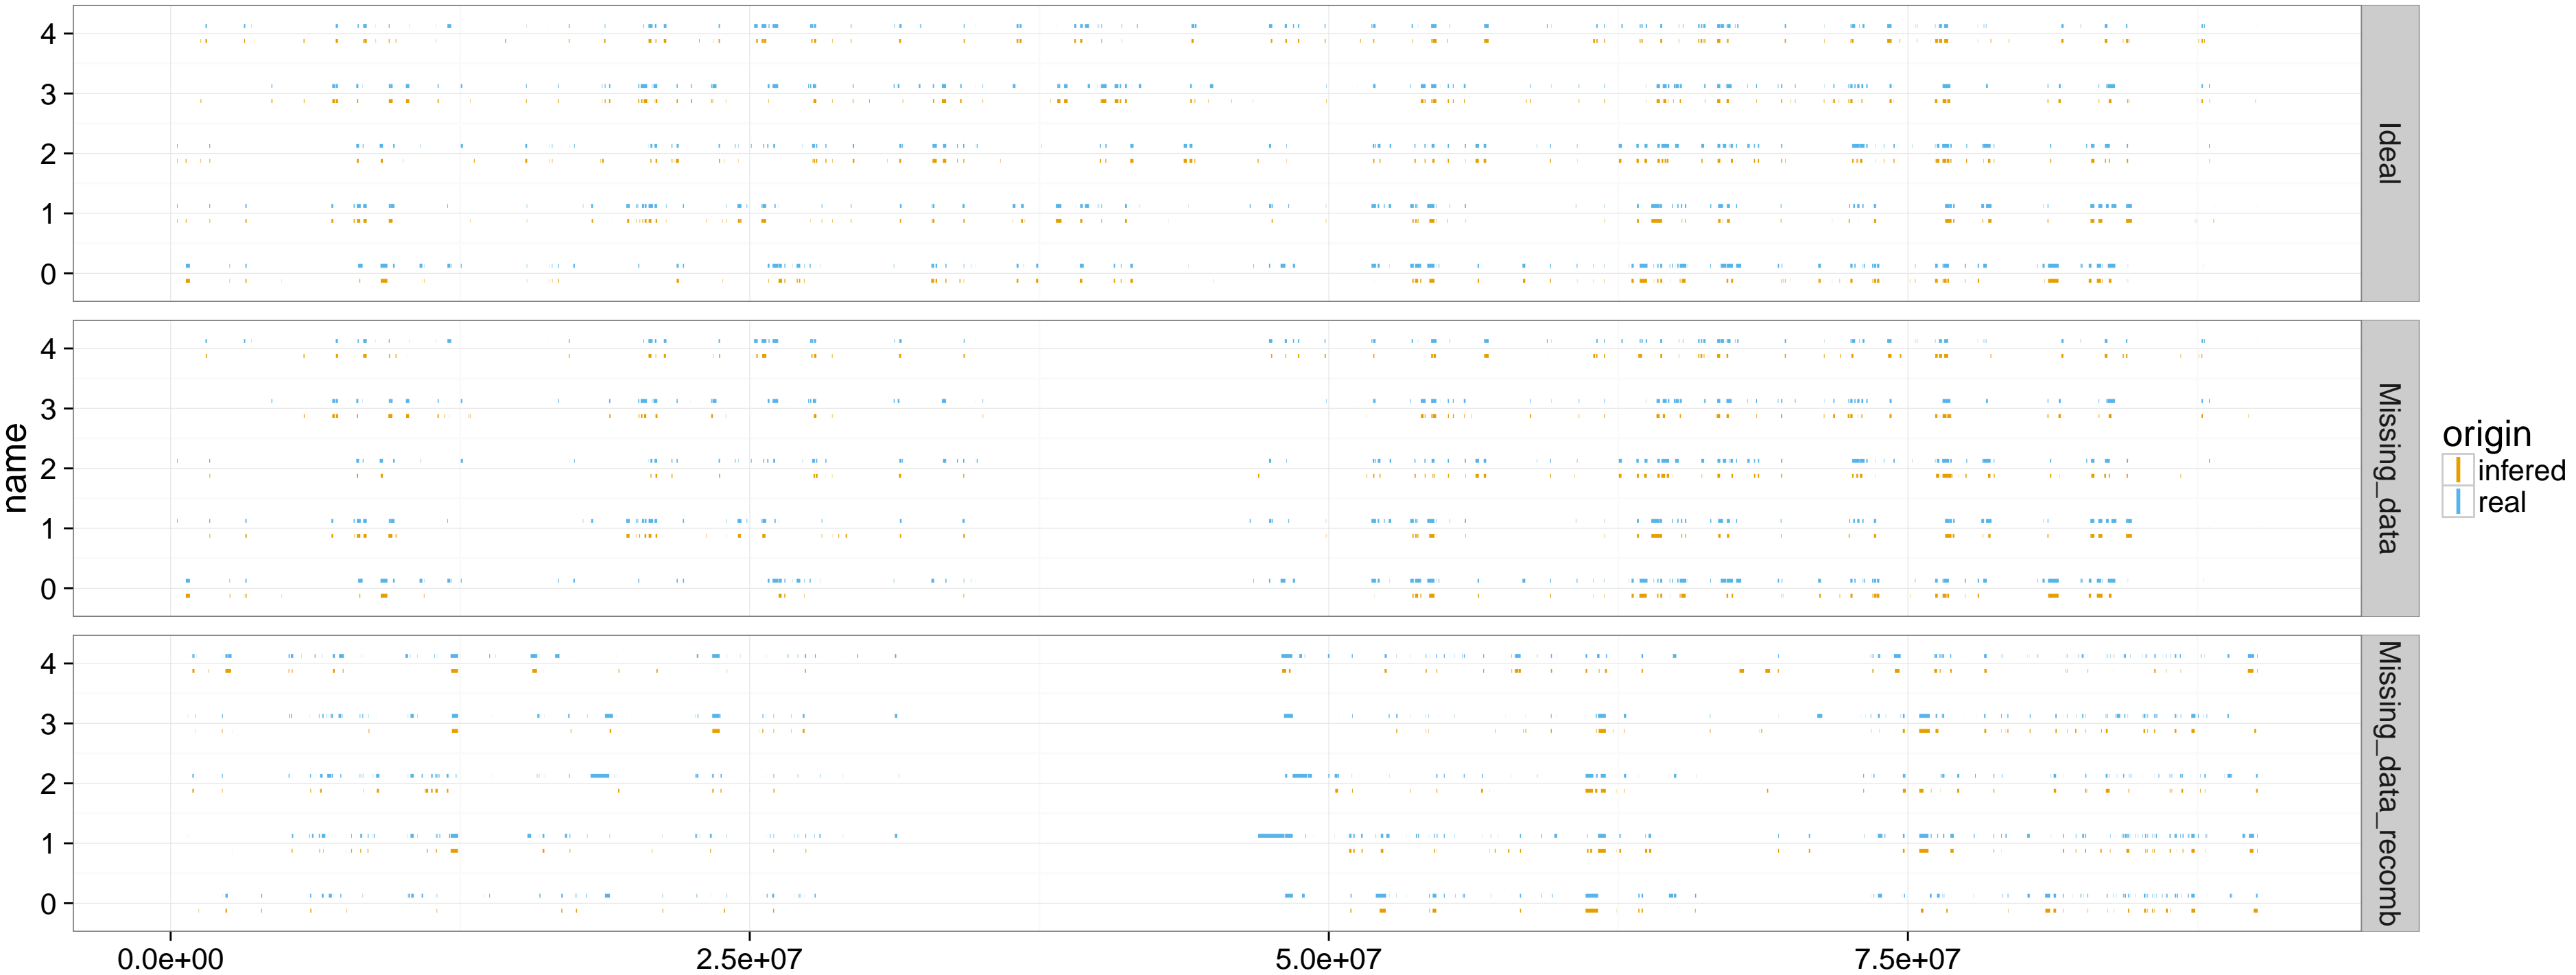



# Archaic segments for chromosome 17

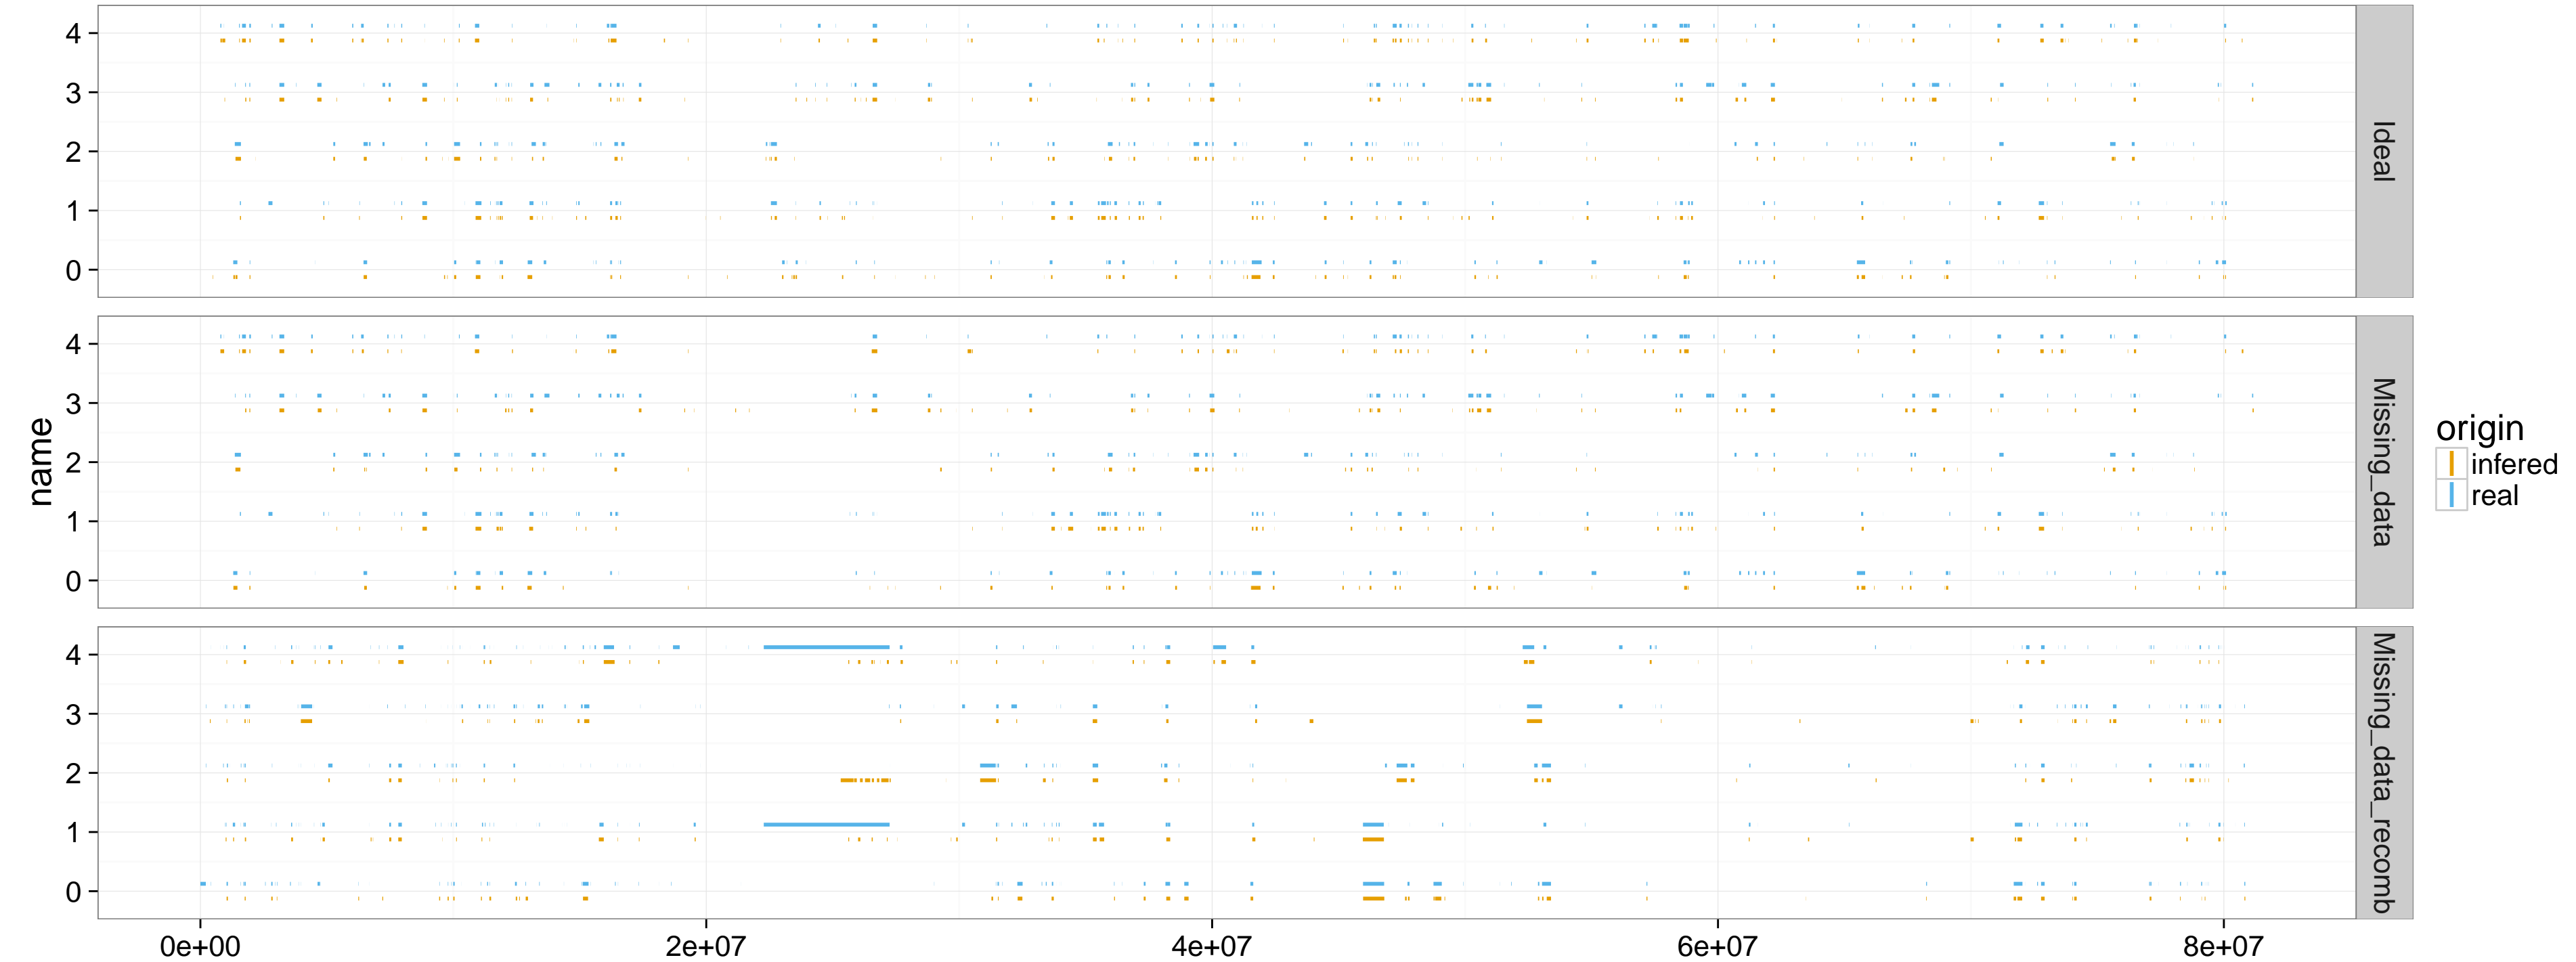

# Archaic segments for chromosome 18

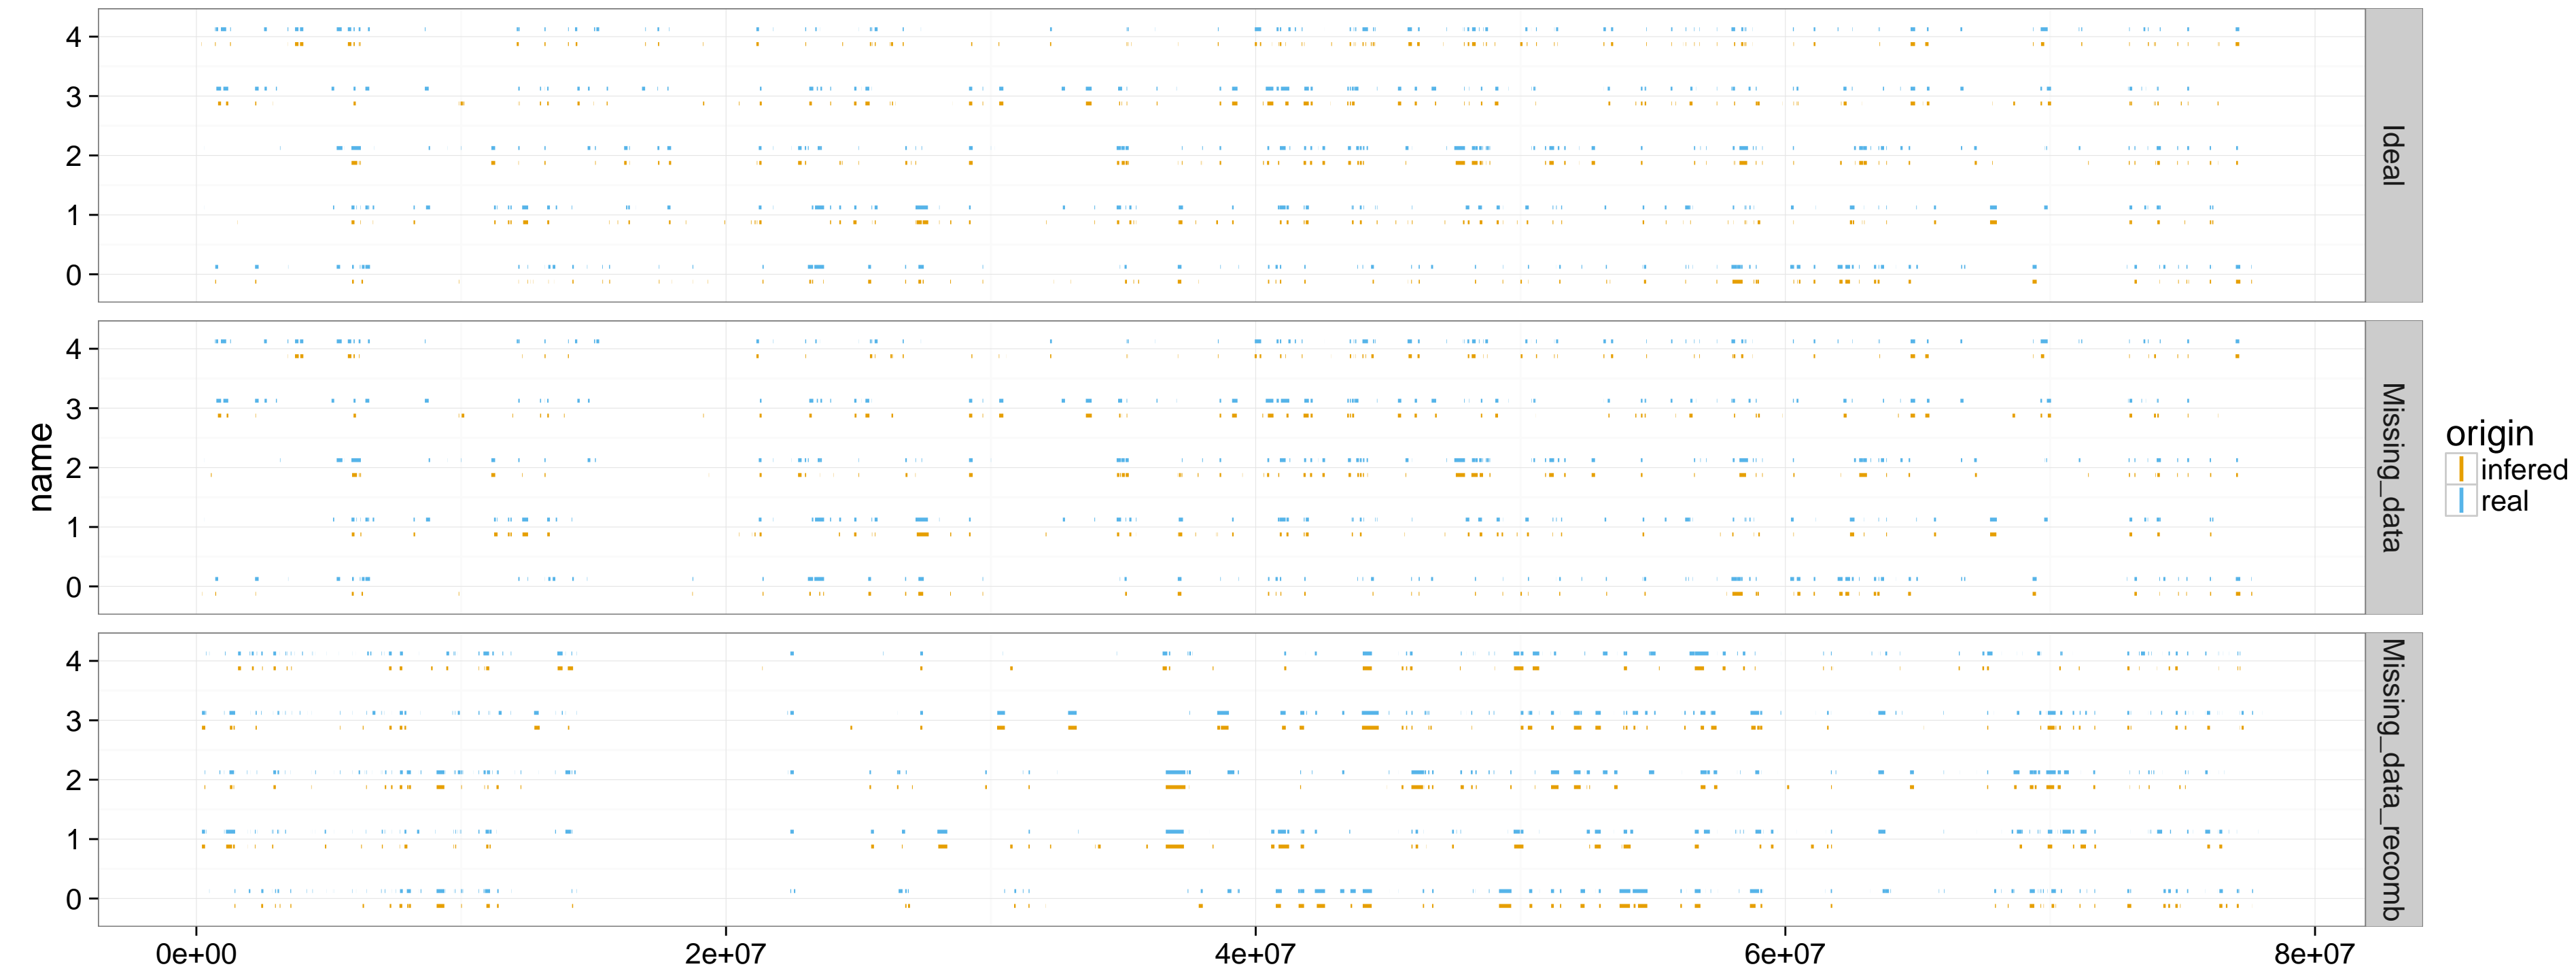

# Archaic segments for chromosome 19

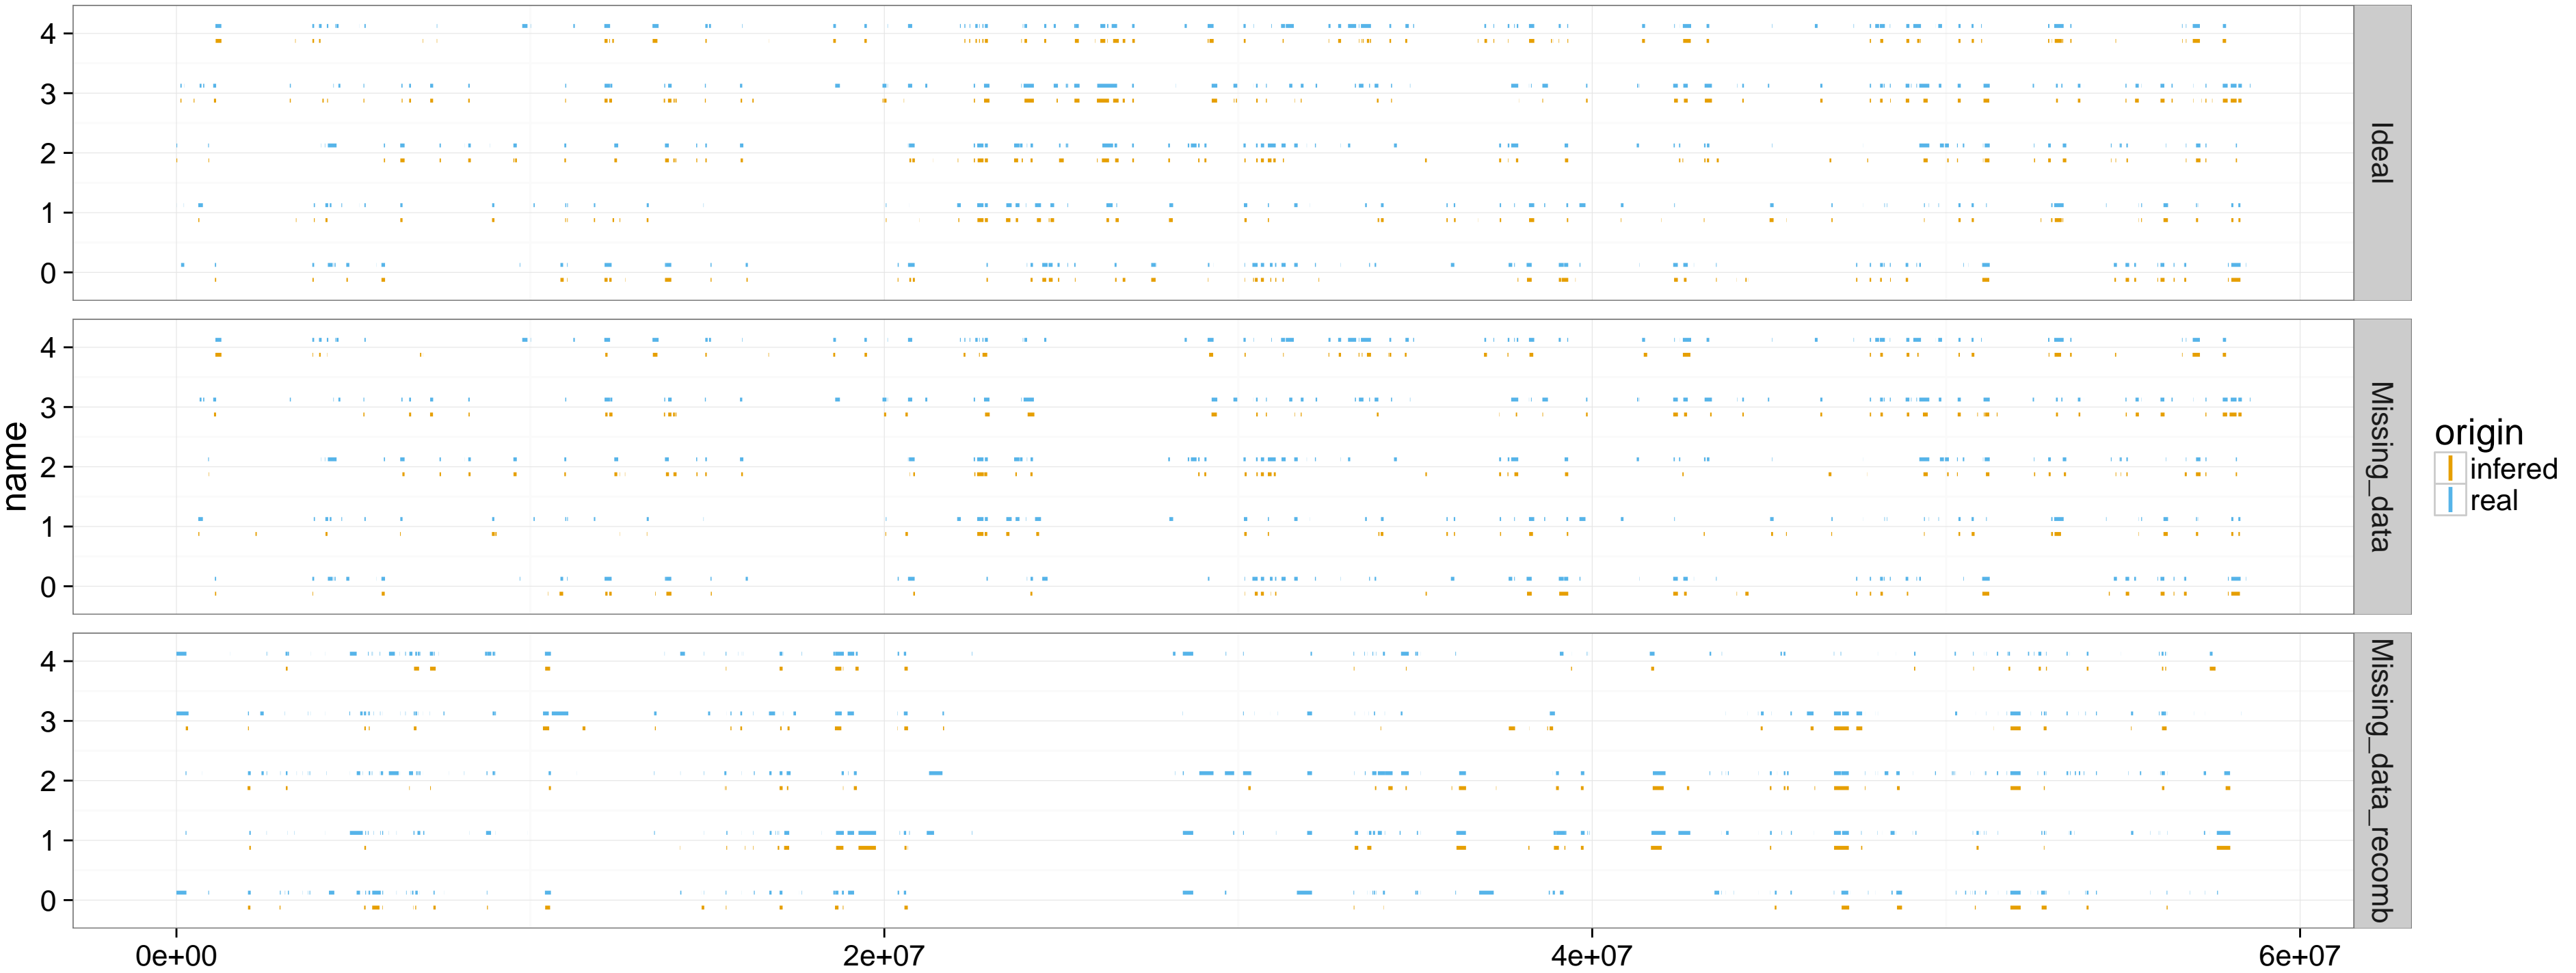

# Archaic segments for chromosome 20

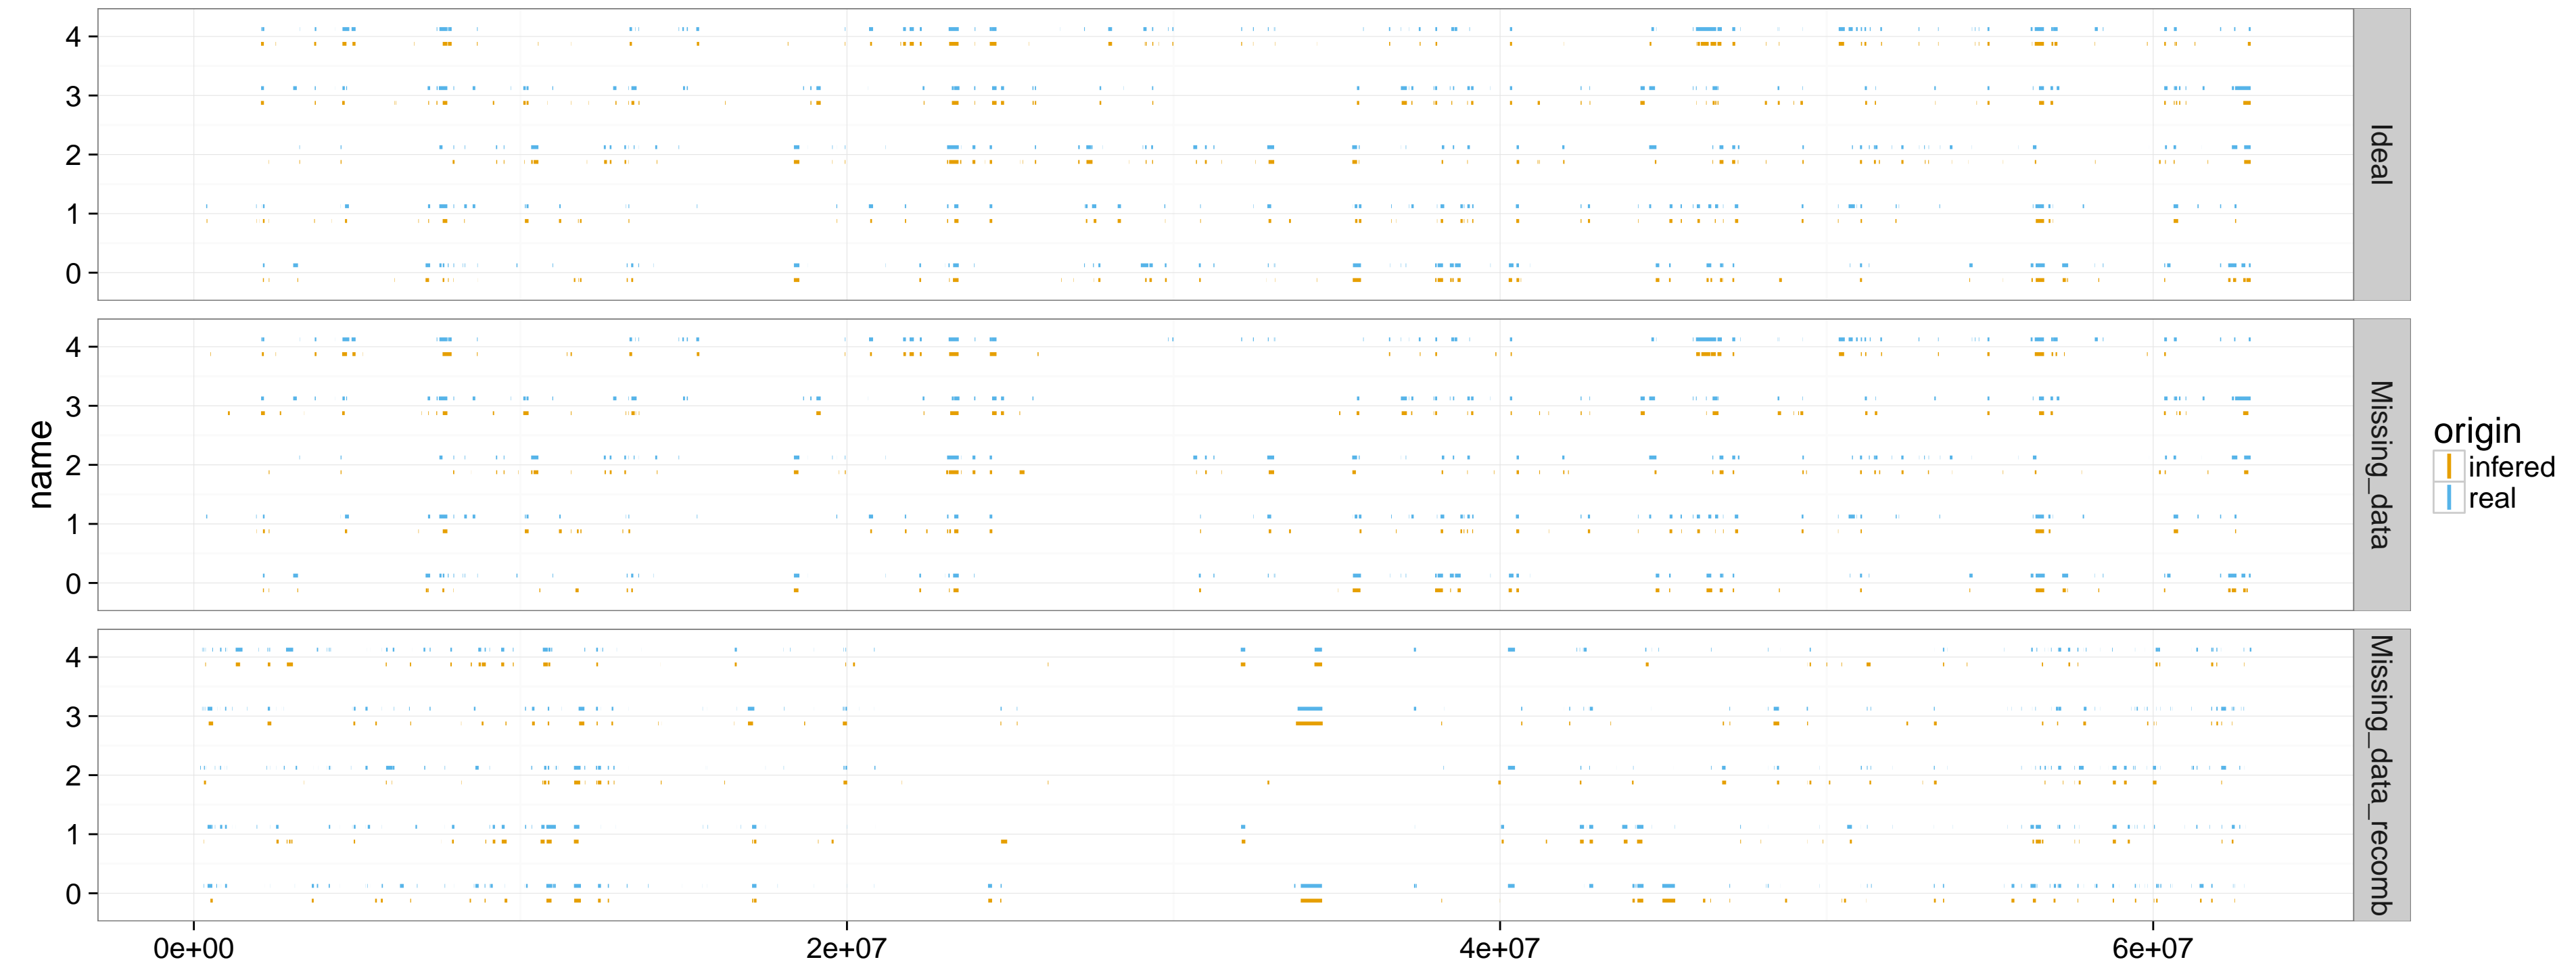

# Archaic segments for chromosome 21

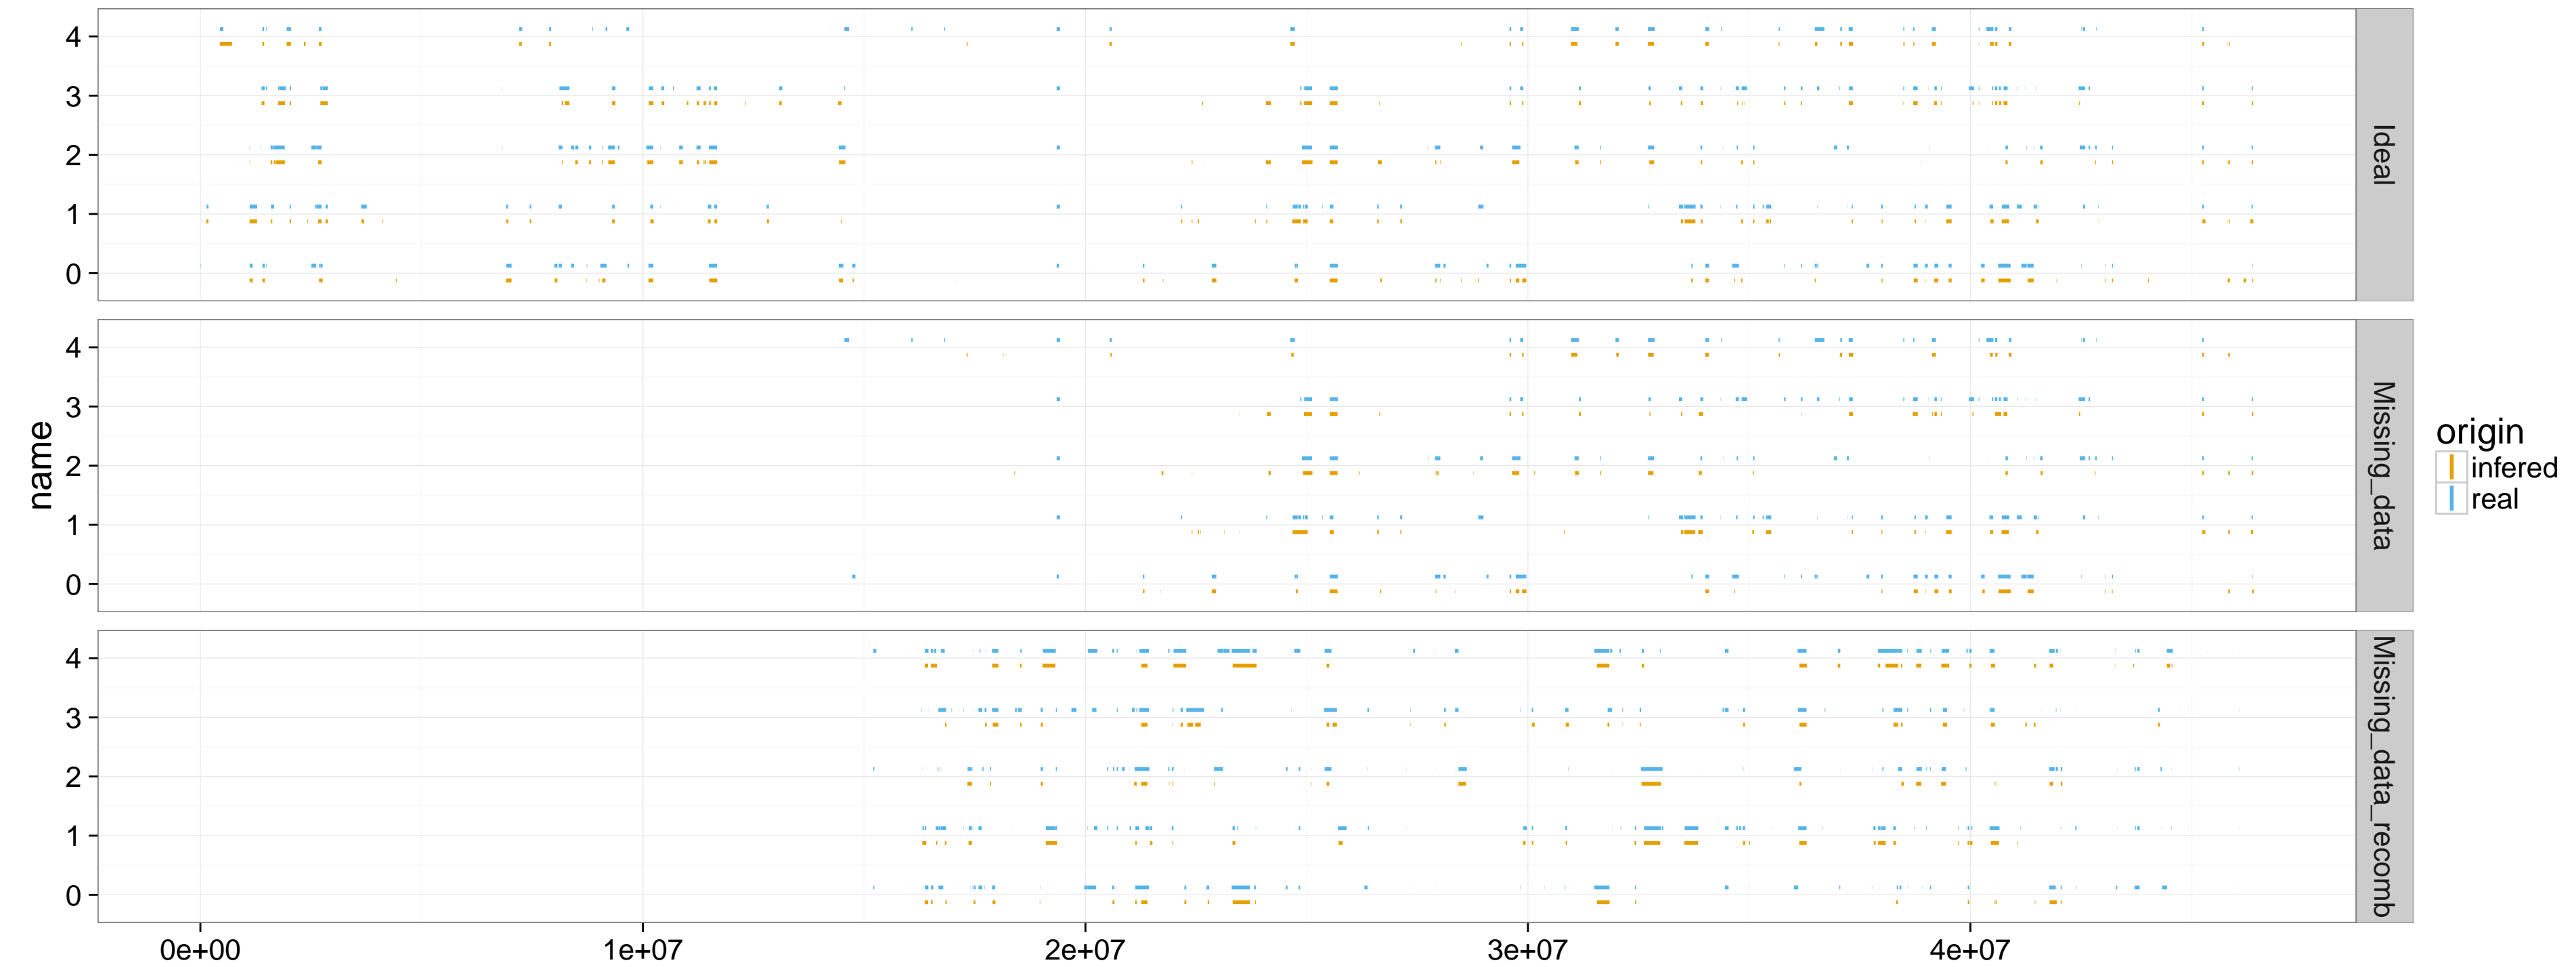

# Archaic segments for chromosome 22

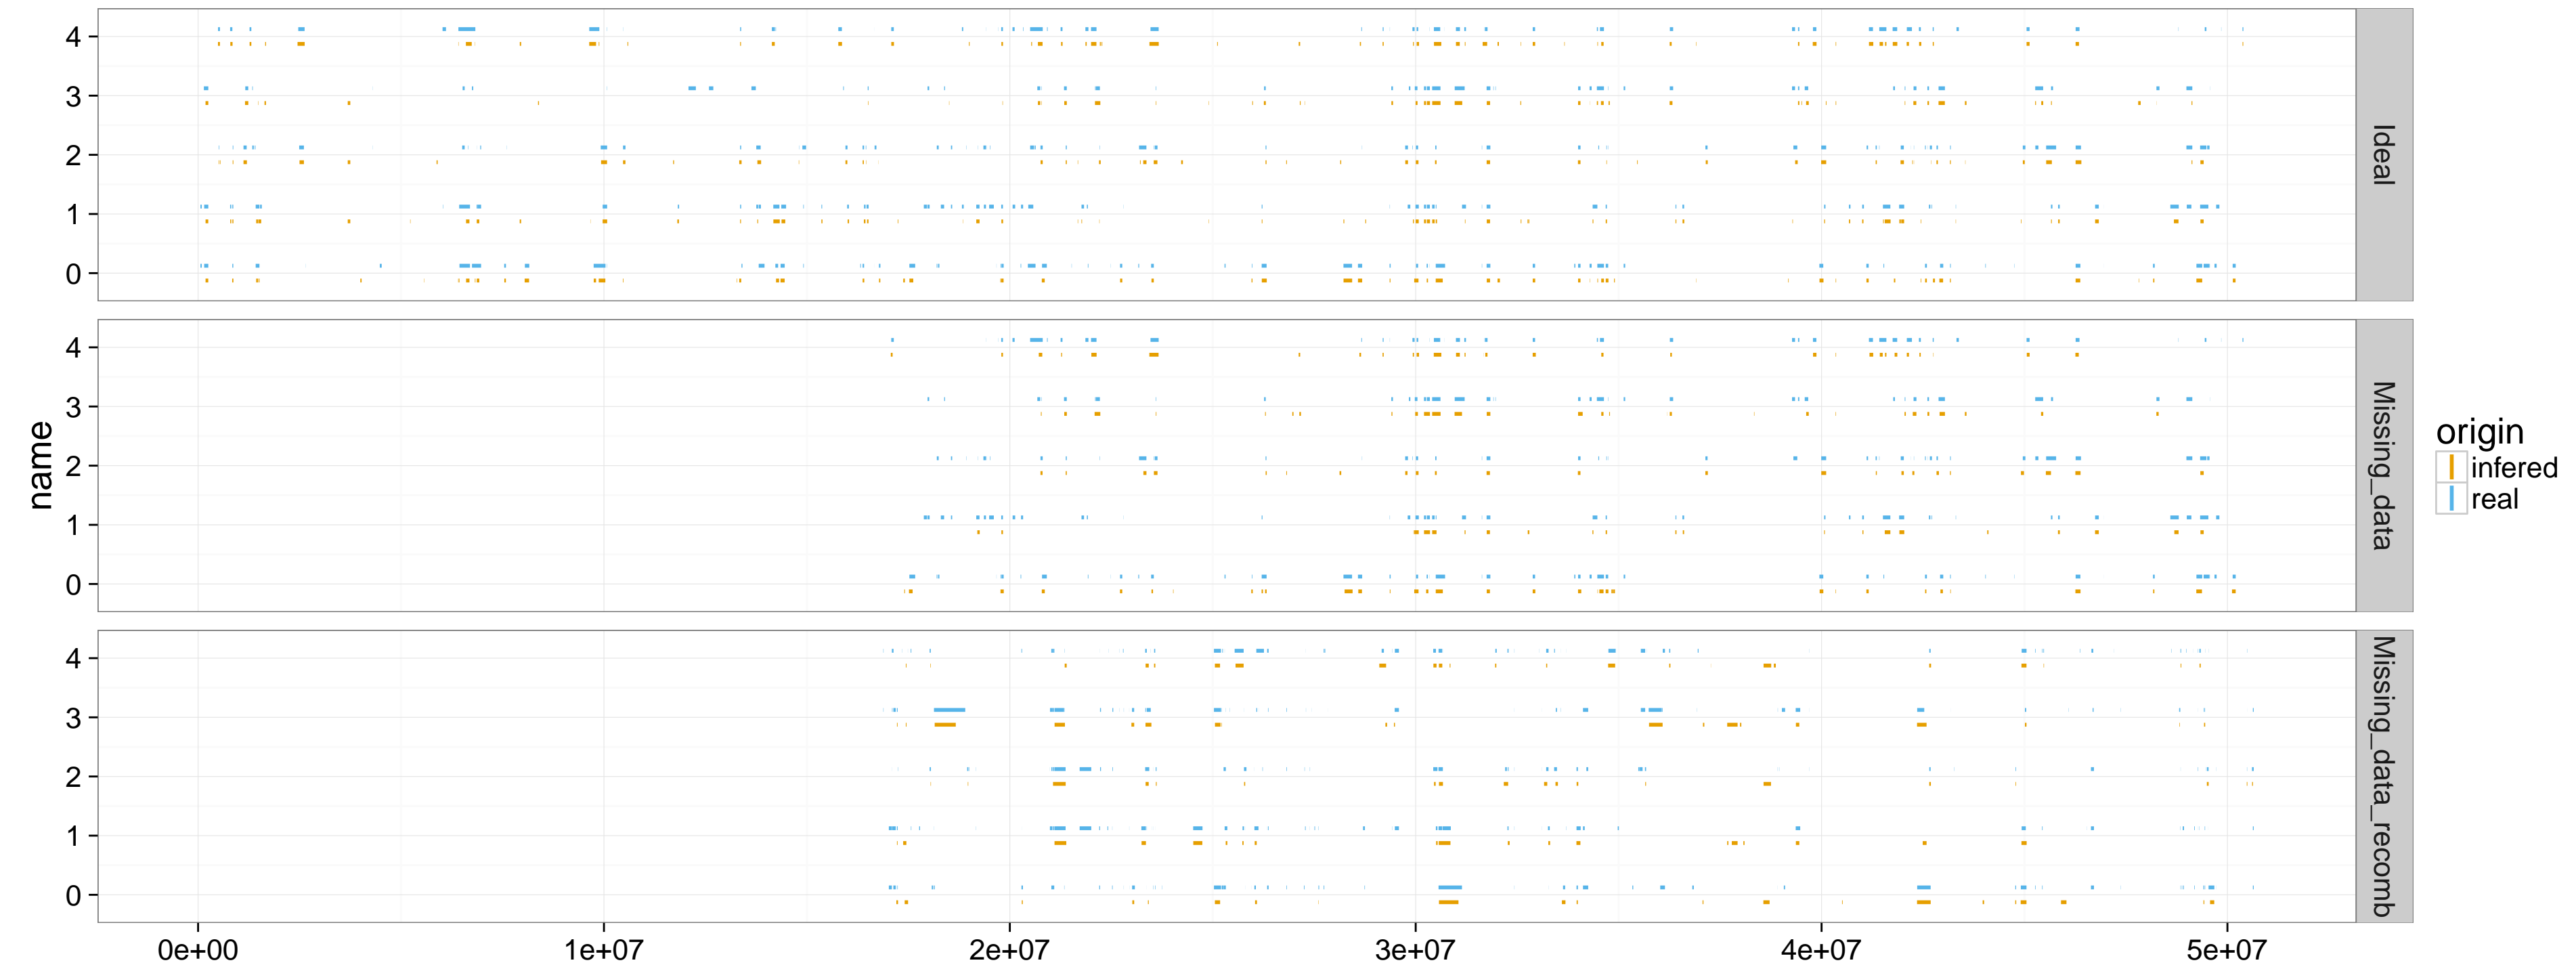

Supplement: Supplementary file [file 283606-4.pdf]
