# Supplementary material for: Detecting archaic introgression without archaic reference genomes
Source: bioRxiv or medRxiv preprint supplement (doi:10.1101/283606), 2018-03-23

- Bottleneck Ne
- Admixture proportion
- Population Ne

29 years generation time

Recombination rate  $1.2 \times 10^{-8}$  events per bp per generation

Mutation rate is  $1.25 \times 10^{-8}$  mut per bp per generation

Bottlenecks are 100 generations

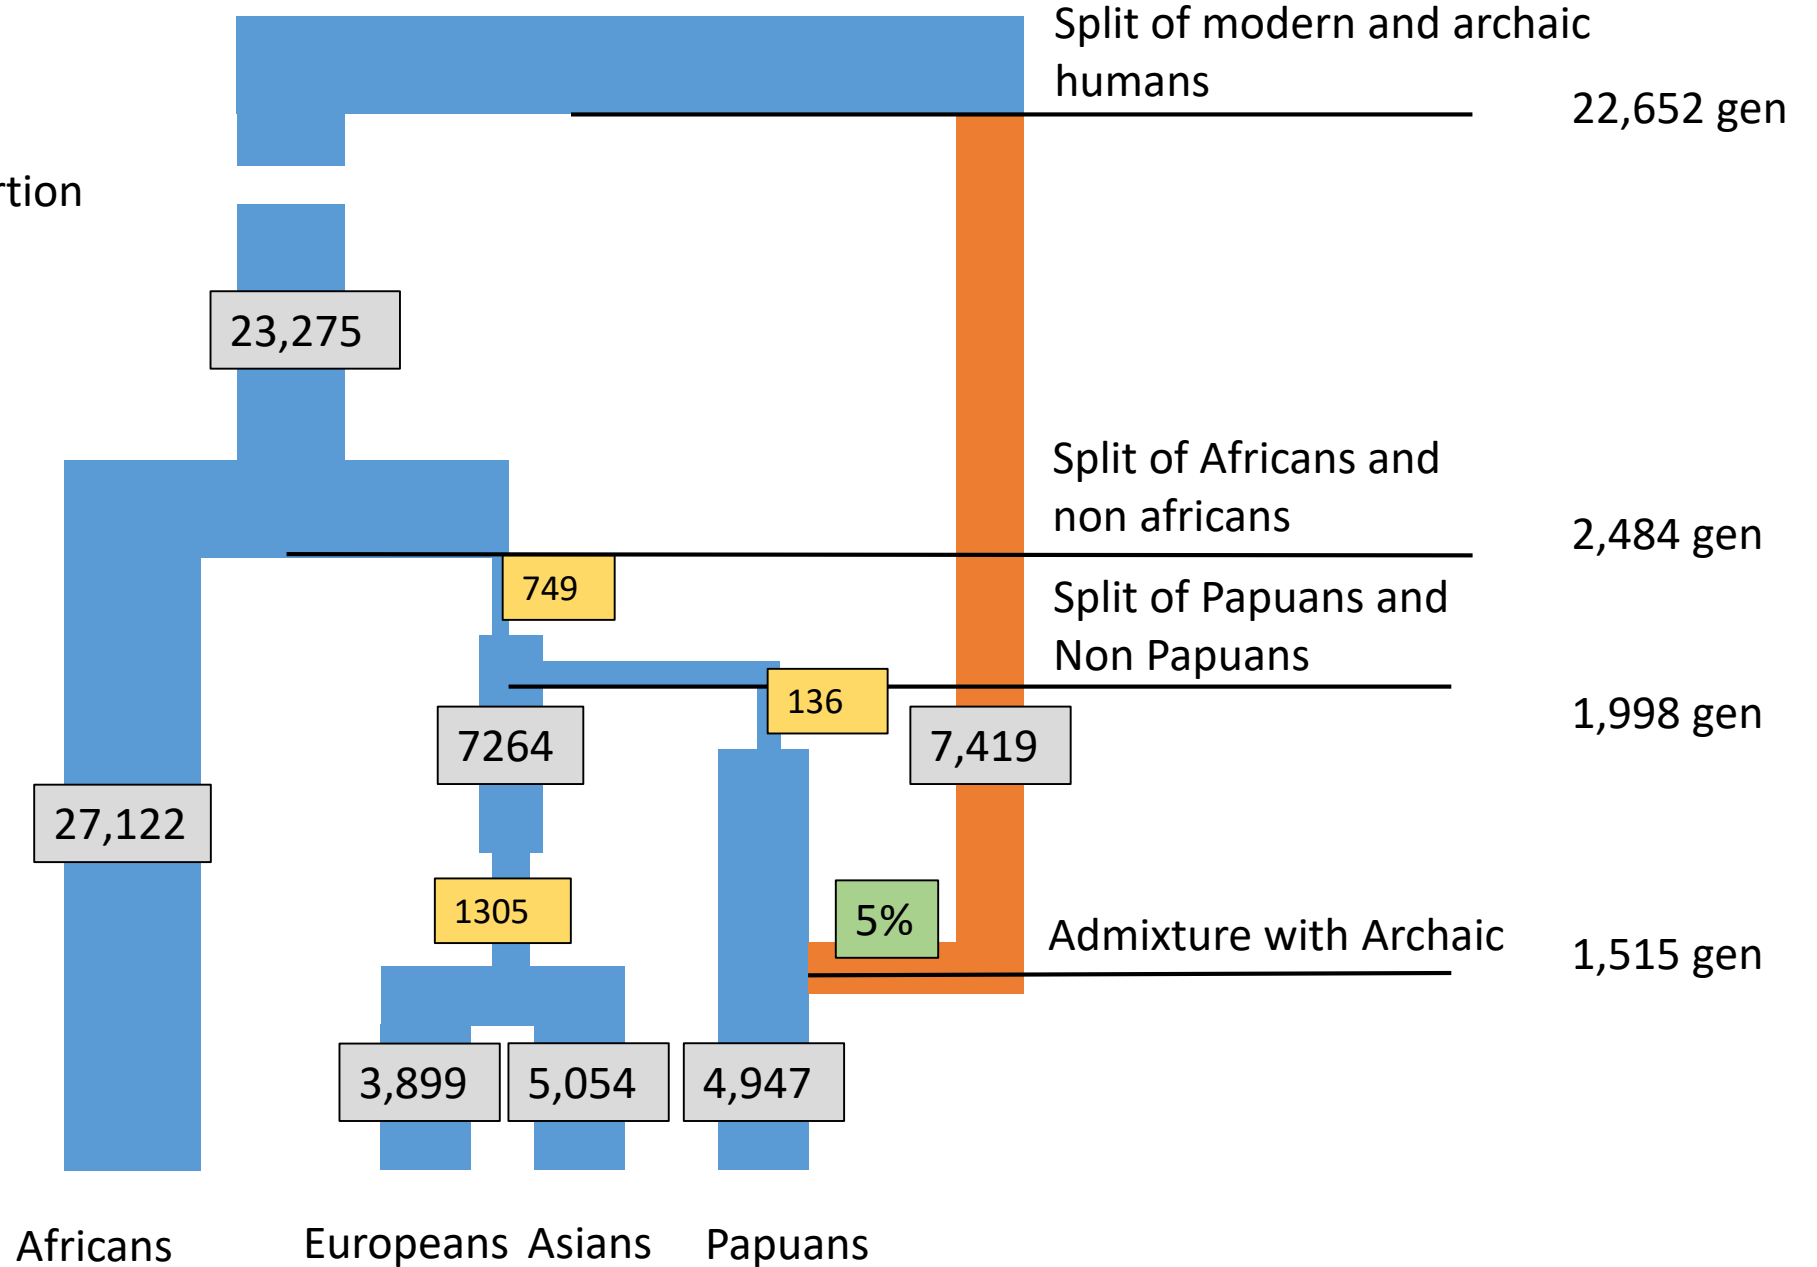

Supplement: Supplementary file [file 283606-2.pdf]
