# Supplementary material for: Detecting archaic introgression without archaic reference genomes
Source: bioRxiv or medRxiv preprint supplement (doi:10.1101/283606), 2018-03-23
Supplement: Supplementary file [file 283606-3.pdf]

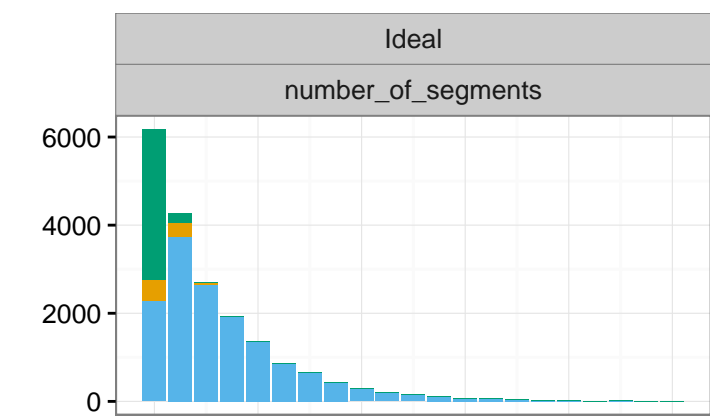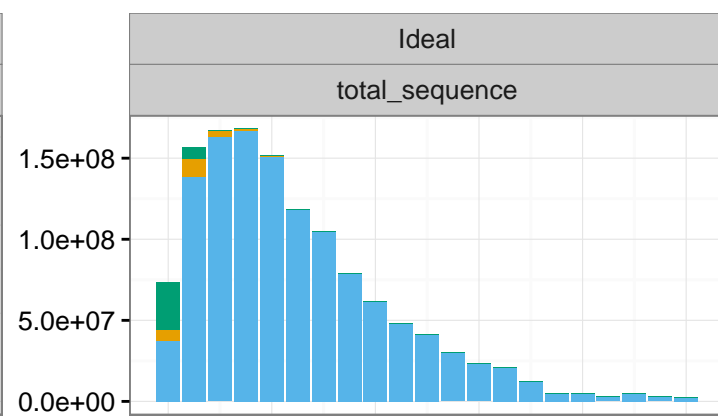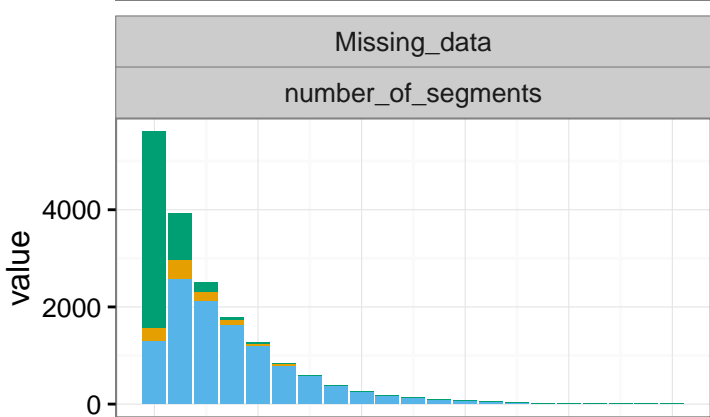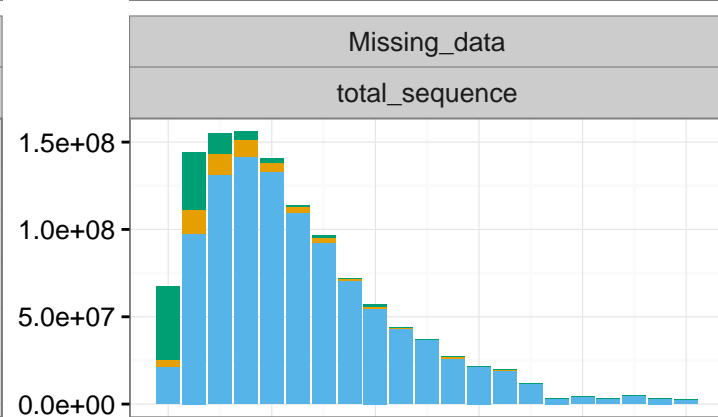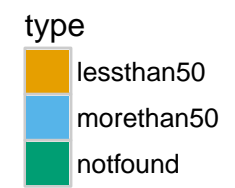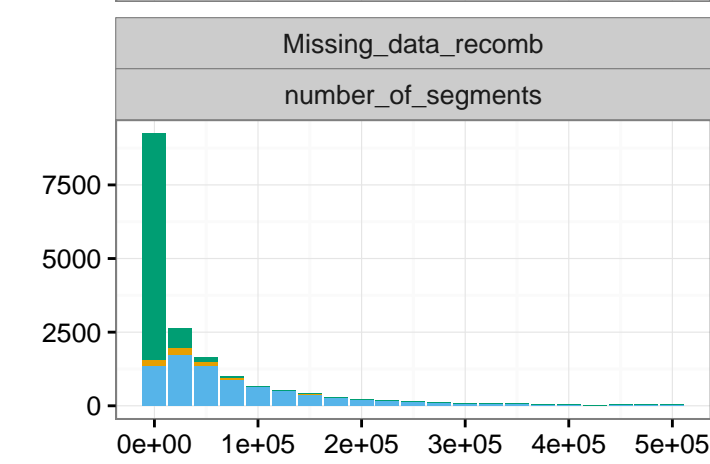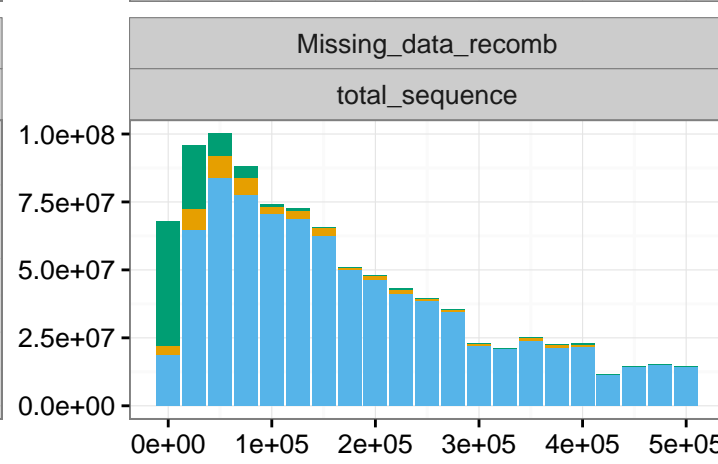

start
