# Supplementary material for: Detecting archaic introgression without archaic reference genomes
Source: bioRxiv or medRxiv preprint supplement (doi:10.1101/283606), 2018-03-23

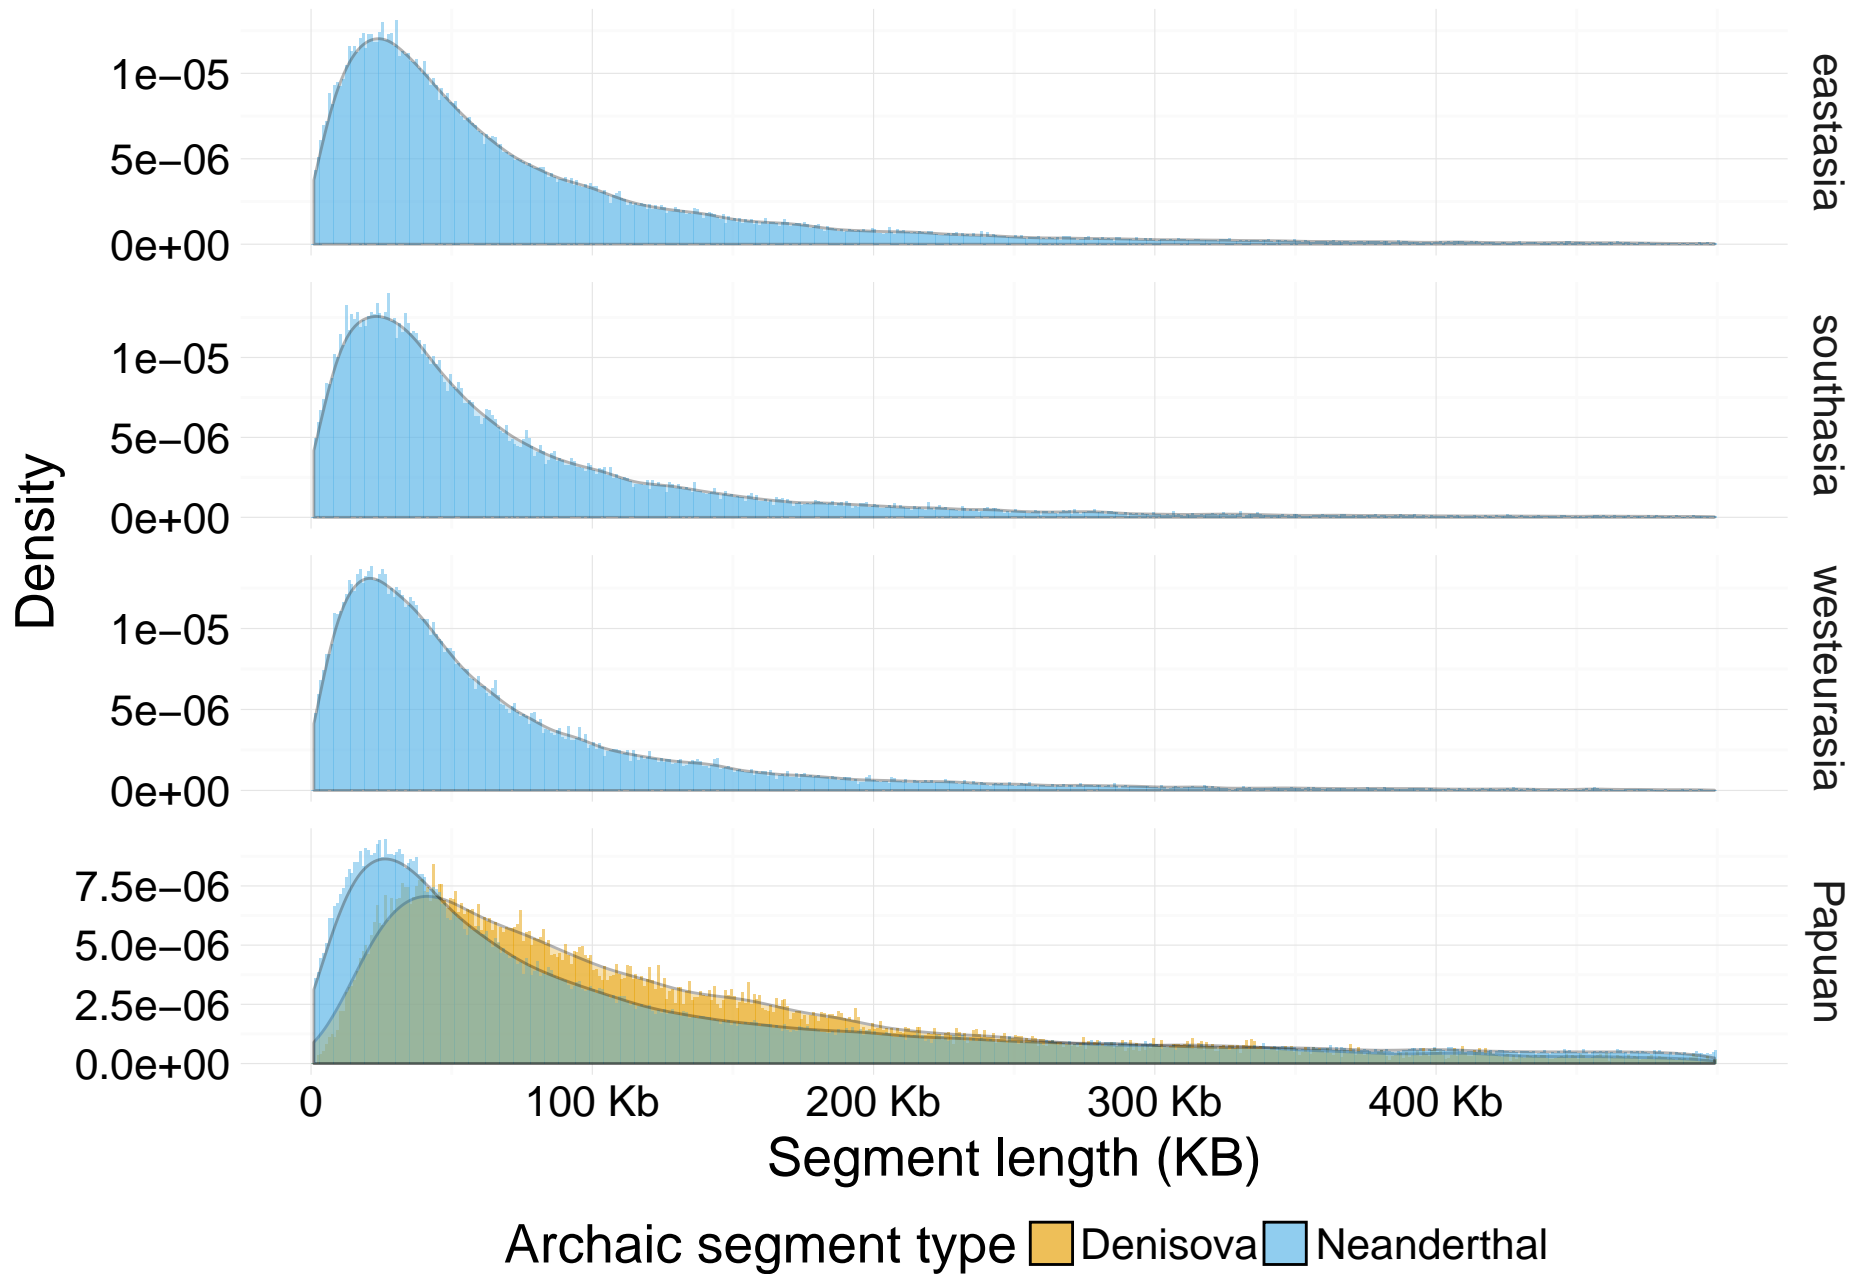

Supplement: Supplementary file [file 283606-8.pdf]
