# Supplementary material for: Detecting archaic introgression without archaic reference genomes
Source: bioRxiv or medRxiv preprint supplement (doi:10.1101/283606), 2018-03-23

Probability of sequence sharing variant with archaic hominins

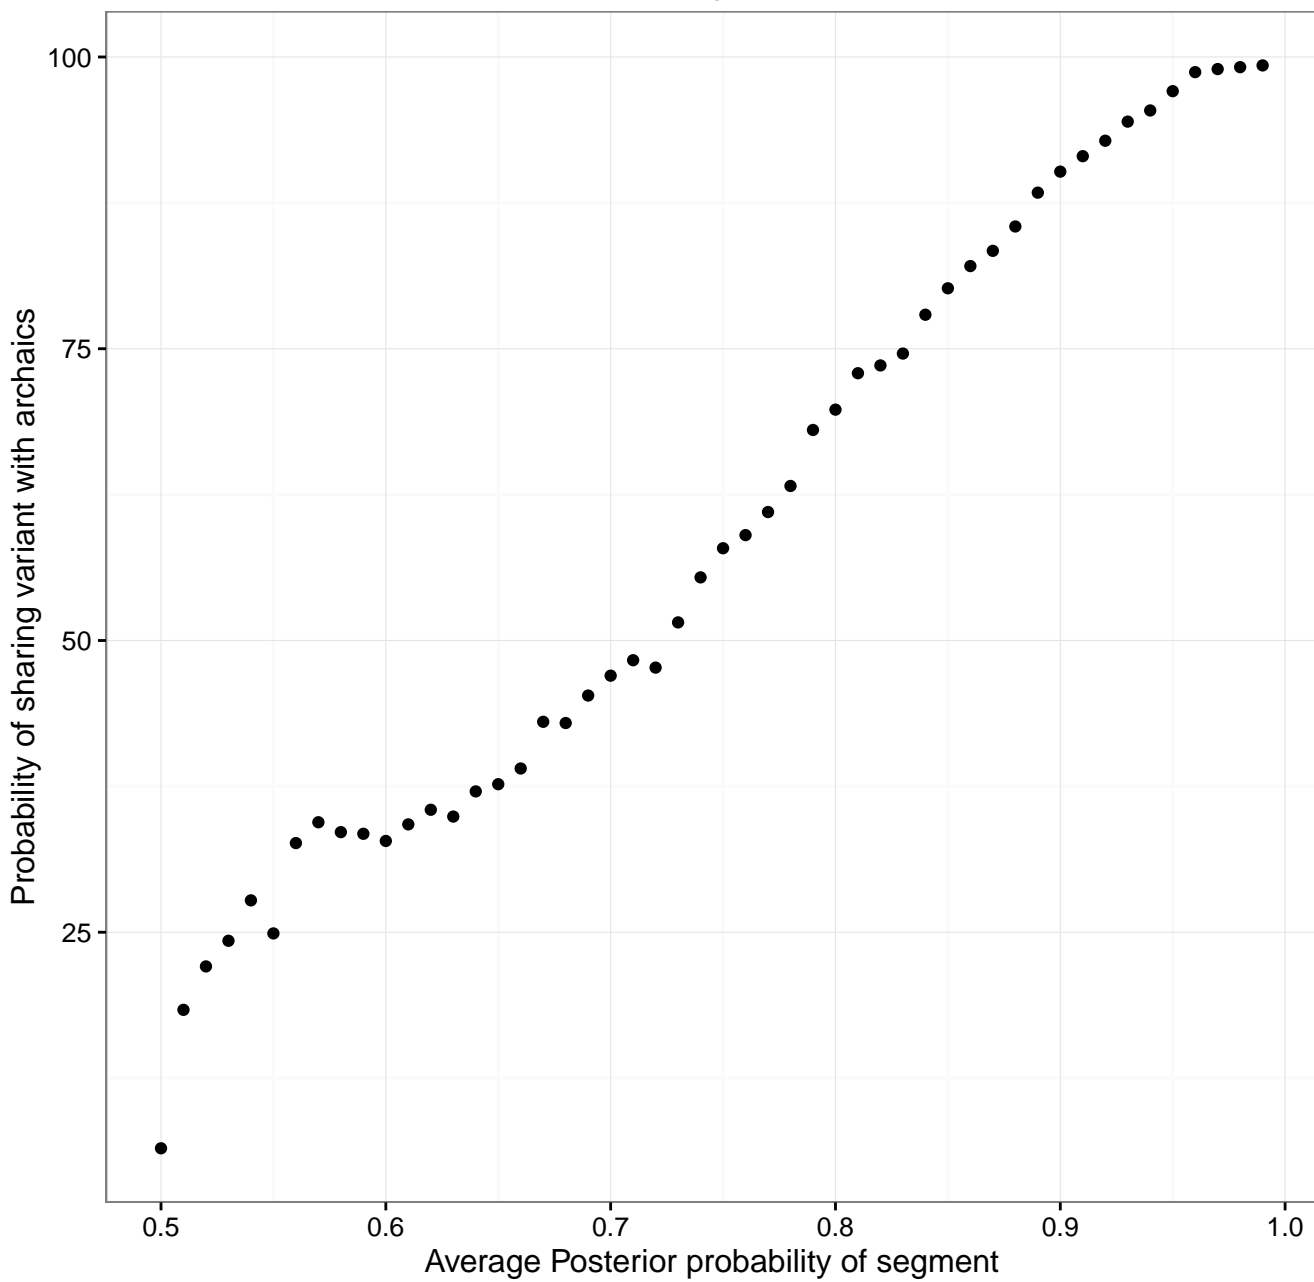

Supplement: Supplementary file [file 283606-9.pdf]
