# Supplementary material for: Detecting archaic introgression without archaic reference genomes
Source: bioRxiv or medRxiv preprint supplement (doi:10.1101/283606), 2018-03-23
Supplement: Supplementary file [file media-1.pdf]

# Transition matrix

Ingroup to Ingroup and Ingroup to Archaic

## Haploid case

|         |         |
|---------|---------|
| Ingroup | Ingroup |
|---------|---------|

$$P(I \rightarrow I) = e^{-T_{adm} \cdot r \cdot L} + (1 - e^{-T_{adm} \cdot r \cdot L})(1 - a)$$

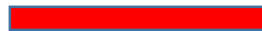

No recombination

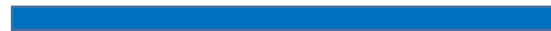

Recombination with another Ingroup segment

When  $T_{adm} \cdot r \cdot L$  is small we can approximate

$$e^{-T_{adm} \cdot r \cdot L} \approx 1 - T_{adm} \cdot r \cdot L$$

$$P(I \rightarrow I) = 1 - a \cdot T_{adm} \cdot r \cdot L$$

The probability of changing state to the archaic state is then:

$$P(I \rightarrow A) = a \cdot T_{adm} \cdot r \cdot L$$

## Diploid case

|         |         |
|---------|---------|
| Ingroup | Ingroup |
| Ingroup | Ingroup |

$$P(I \rightarrow I) = e^{-T_{adm} \cdot r \cdot L} + (1 - e^{-T_{adm} \cdot r \cdot L})(1 - 2a)$$

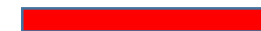

No recombination

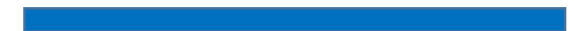

Recombination with another human segment

The 2a is because we don't want to recombine with archaic segment of either chromosome. The rest of the calculations are the same.

$$P(I \rightarrow I) = 1 - 2a \cdot T_{adm} \cdot r \cdot L$$

$$P(I \rightarrow A) = 2a \cdot T_{adm} \cdot r \cdot L$$

# Transition matrix

Archaic to archaic and archaic to Ingroup

## Haploid case

|         |         |
|---------|---------|
| Archaic | Archaic |
|---------|---------|

$$P(A \rightarrow A) = e^{-T_{adm} \cdot r \cdot L} + (1 - e^{-T_{adm} \cdot r \cdot L})a$$



No recombination

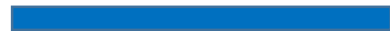

Recombination with another archaic segment

$$P(A \rightarrow A) = 1 - (1 - a) \cdot T_{adm} \cdot r \cdot L$$

$$P(A \rightarrow I) = (1 - a) \cdot T_{adm} \cdot r \cdot L$$

## Diploid case

|         |         |
|---------|---------|
| Archaic | Archaic |
| Ingroup | Ingroup |

$$P(A \rightarrow A) = e^{-T_{adm} \cdot r \cdot L} + (1 - e^{-T_{adm} \cdot r \cdot L})a$$

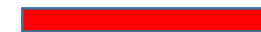

No recombination

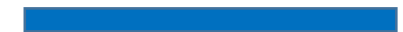

Recombination with another human segment

If we assume that Archaic segments are only heterozygous the transition probabilities does not change.

$$P(A \rightarrow A) = 1 - (1 - a) \cdot T_{adm} \cdot r \cdot L$$

$$P(A \rightarrow I) = (1 - a) \cdot T_{adm} \cdot r \cdot L$$

# Emission values

Ingroup and Archaic

## Haploid case

Ingroup state

$$\lambda_{Ingroup} = \mu \cdot L \cdot T_{Ingroup}$$

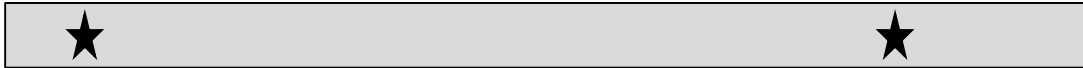

Archaic state

$$\lambda_{Archaic} = \mu \cdot L \cdot T_{Archaic}$$

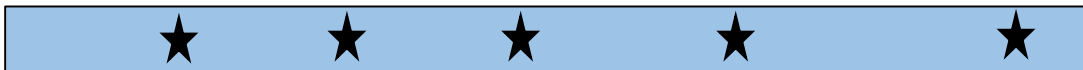

## Diploid case

Ingroup state

$$\lambda_{Ingroup} = 2 \cdot \mu \cdot L \cdot T_{Ingroup}$$

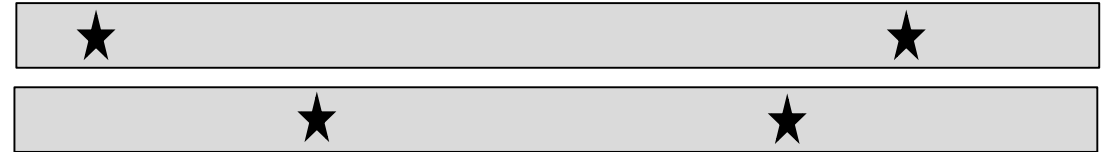

Archaic state

$$\lambda_{Archaic} = \mu \cdot L \cdot T_{Archaic} + \mu \cdot L \cdot T_{Ingroup}$$

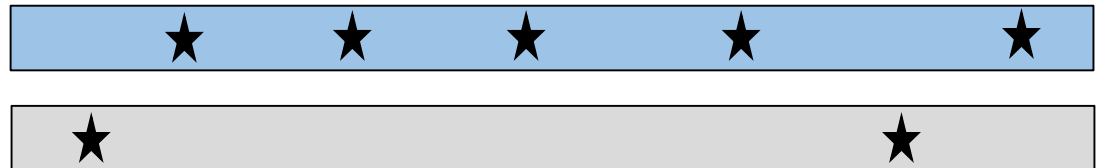

We assume archaic segments are always heterozygous
