# Supplementary material for: Detecting archaic introgression without archaic reference genomes
Source: bioRxiv or medRxiv preprint supplement (doi:10.1101/283606), 2018-03-23

Subsaharan Africans

Whole world

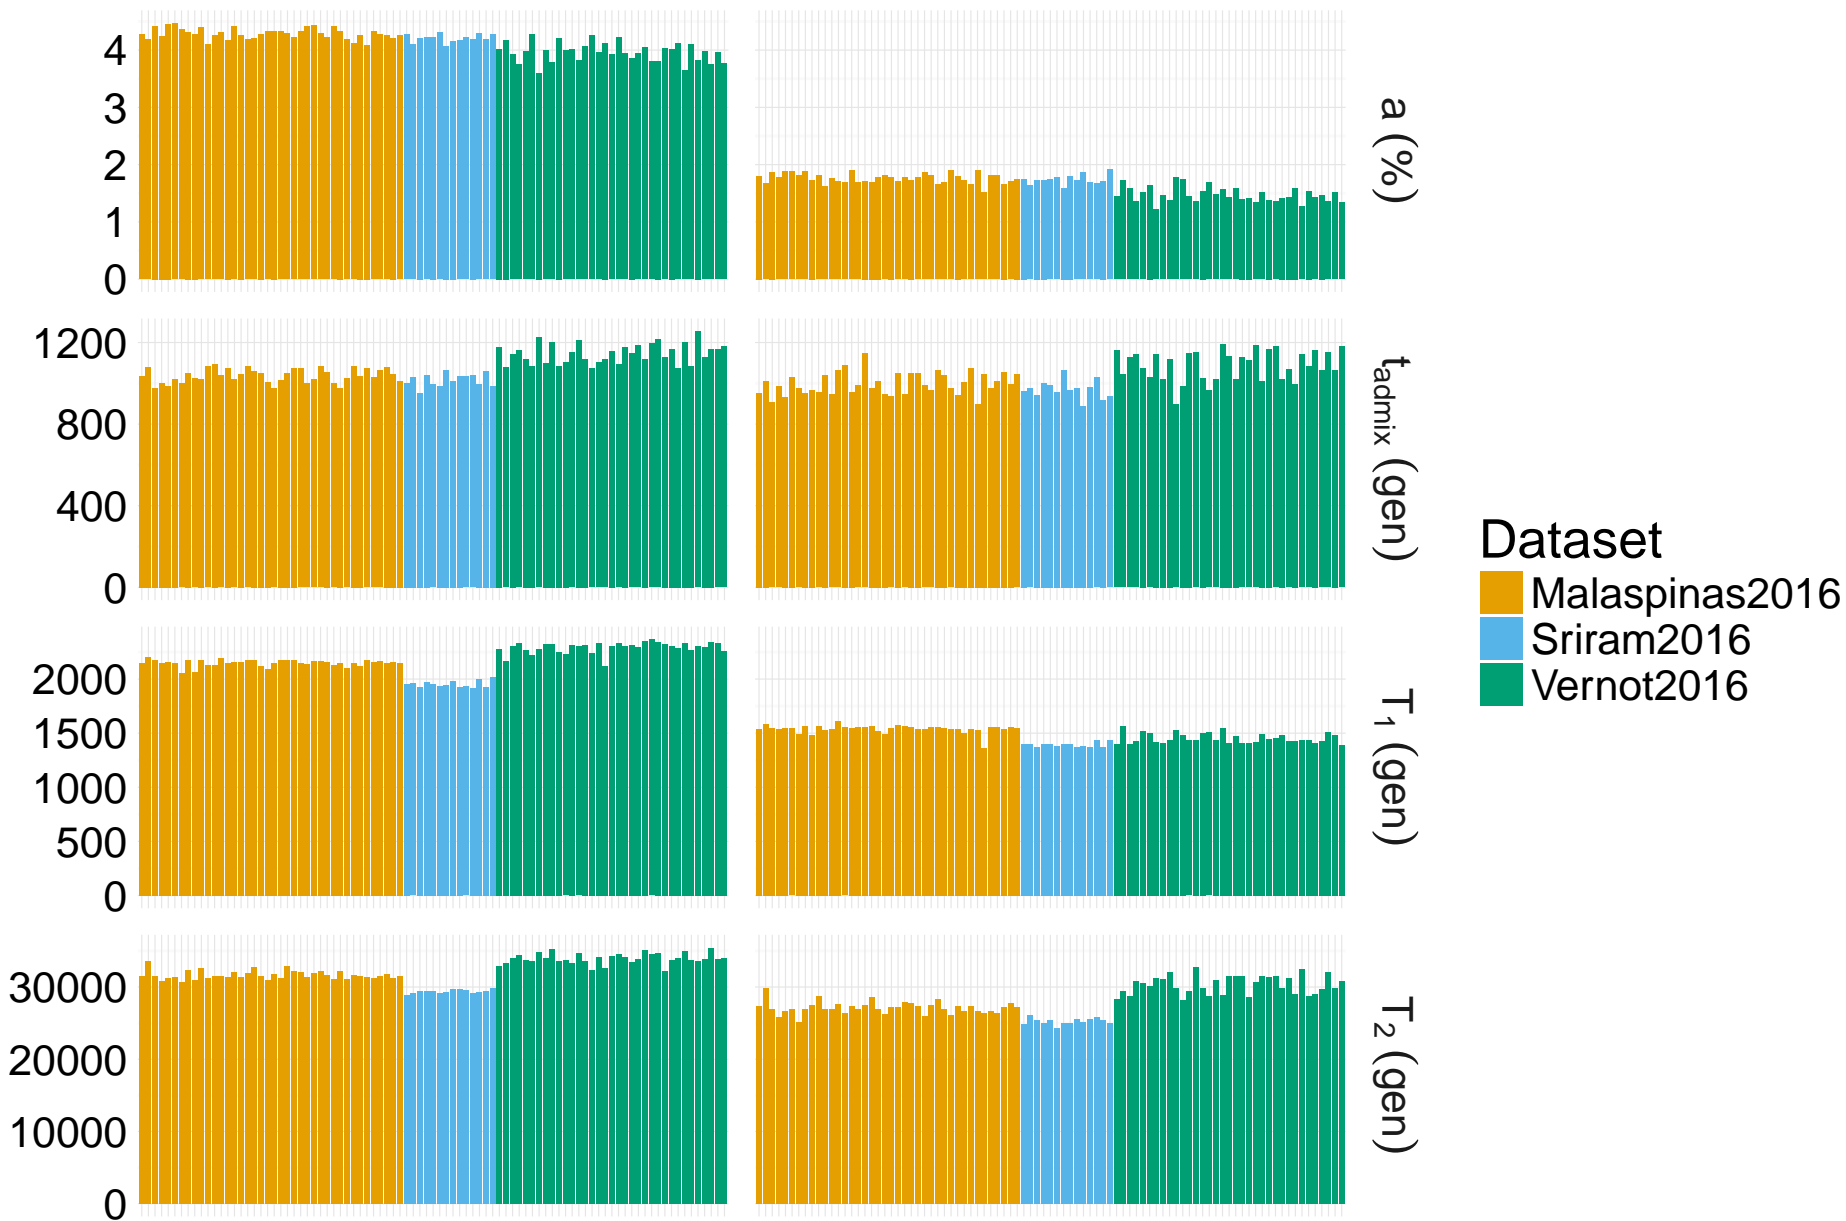

Supplement: Supplementary file [file media-5.pdf]
